# Steroidogenesis in the Fetal Testis and Its Susceptibility to Disruption by Exogenous Compounds

Hayley M. Scott, J. Ian Mason, and Richard M. Sharpe

Medical Research Council Human Reproductive Sciences Unit (H.M.S., R.M.S.), and Division of Reproductive and Developmental Science (J.I.M.), Centre for Reproductive Biology, The Queen's Medical Research Institute, Edinburgh EH16 4TJ, United Kingdom

Masculinization depends on adequate production of testosterone by the fetal testis within a specific "masculinization programming window." Disorders resulting from subtle deficiencies in this process are common in humans, and environmental exposures/lifestyle could contribute causally because common therapeutic and environmental compounds can affect steroidogenesis. This evidence derives mainly from rodent studies, but because there are major species differences in regulation of steroidogenesis in the fetal testis, this may not always be a guide to potential effects in the human. In addition to direct study of the effects of compounds on steroidogenesis, information also derives from study of masculinization disorders that result from mutations in genes in pathways regulating steroidogenesis. This review addresses this issue by critically reviewing the comparative timing of production and regulation of steroidogenesis in the fetal testis of humans and of rodents and its susceptibility to disruption; where there is limited information for the fetus, evidence from effects on steroidogenesis in the adult testis is considered. There are a number of fundamental regulatory differences between the human and rodent fetal testis, most notably in the importance of paracrine vs. endocrine drives during masculinization such that inactivating LH receptor mutations block masculinization in humans but not in rodents. Other large differences involve the steroidogenic response to estrogens and GnRH analogs and possibly phthalates, whereas for other compounds there may be differences in sensitivity to disruption (ketoconazole). This comparison identifies steroidogenic targets that are either vulnerable (mitochondrial cholesterol transport, CYP11A, CYP17) or not (cholesterol uptake) to chemical interference. (*Endocrine Reviews* 30: 883–925, 2009)

- I. Introduction and Background
- II. Scope of This Review
- III. The Steroidogenic Cascade and Its Regulation
  - A. Preferred sources and mobilization of cholesterol
  - B. Cholesterol transport within the Leydig cells
  - C. Steroid biosynthetic pathways in Leydig cells
  - D. Conversion of pregnenolone to testosterone
  - E. Regulation of steroidogenic enzymes
- IV. Steroidogenesis by the Fetal Testis and Species Differences
  - A. Role in masculinization, regulation and timing
  - B. Ontogeny of testosterone secretion by the human fetal testis
  - C. Ontogeny of testosterone secretion by the rat fetal testis
  - D. Relationship between testosterone production by the fetal testis and masculinization
- V. Inferences Regarding Regulation of Fetal Steroidogenesis from Masculinization Defects in Humans and Animals
  - A. Effects of anencephaly (LH deficiency)
  - B. GnRH and kisspeptin/GPR54 mutations
  - C. LH and LH receptor mutations
  - D. P450 oxidoreductase (POR) deficiencies (PORD)
  - E. Masculinization disorders when fetal testis function is normal
- VI. Susceptibility of Fetal Leydig Cell Steroidogenesis to Disruption/Inhibition by Therapeutic Compounds and Environmental Chemicals
  - A. Estrogens
  - B. Glucocorticoids
  - C. Glitazones
  - D. GnRH/GnRH analogs
  - E. Ketoconazole

Abbreviations: AF, Amniotic fluid; AGD, anogenital distance; AR, androgen receptor; CAIS, complete androgen insensitivity syndrome; CG, chorionic gonadotropin; DBP, dibutyl phthalate; DEHP, diethyl hexyl phthalate; DES, diethylstilbestrol; DHEA, dehydroepiandrosterone; DHT, dihydrotestosterone; e, embryonic day/gestational day; ER, estrogen receptor; GPR54, G protein-coupled receptor 54; hCG, human CG; HDL, high-density lipoprotein; HMG-CoA, 3-hydroxy-3-methylglutaryl coenzyme A; HSD, hydroxysteroid dehydrogenase; ITT, intratesticular testosterone; LDL, low-density lipoprotein; LH/CG receptor; MBP, monobutyl phthalate; MEHP, monoethyl hexyl phthalate; MEP, monoethyl phthalate; NADPH, nicotinamide adenine dinucleotide phosphate (reduced); POR, P450 oxidoreductase; PORD, POR disorder; PPAR, peroxisome proliferator-activated receptor; PVC, polyvinyl chloride; SF1, steroidogenic factor-1; SRB1, scavenger receptor class B, member 1 (also known as SCARB1); StAR, steroidogenic acute regulatory protein; TDS, testicular dysgenesis syndrome; TSPO, translocator protein (also known as PBR).

ISSN Print 0021-972X ISSN Online 1945-7197

Printed in U.S.A.

Copyright © 2009 by The Endocrine Society

doi: 10.1210/er.2009-0016 Received April 20, 2009. Accepted August 19, 2009.

First Published Online November 3, 2009

- F. Prochloraz
  - G. Statins
  - H. Phthalate esters (phthalates)
  - I. Linuron
  - J. 2,3,7,8-Tetrachlorodibenzo-p-dioxin (TCDD; dioxin) and related compounds
- VII. Conclusions and Unanswered Questions

## I. Introduction and Background

**S**teroid hormones produced by the adrenals, gonads, and (in pregnancy) placenta play vital roles in day-to-day physiology and reproduction. Arguably, the most profound of all the numerous effects of steroid hormones is the role of androgens in “making a male” during fetal development, because this literally switches that individual from developing as a phenotypic female into developing as a phenotypic male. This is illustrated dramatically in the case of complete androgen insensitivity syndrome (CAIS), when the absence of a functional androgen receptor (AR) means that the fetus will develop into a phenotypic female irrespective of the otherwise normal formation and hormonal function of testes (1). CAIS is rare, as is partial androgen insensitivity syndrome, and both most commonly result from mutations in the AR (1). However, of much greater concern from a numbers perspective are disorders that may occur when the masculinization process fails in more subtle ways, such that the individual appears phenotypically male but may have a disorder, such as hypospadias or cryptorchidism. Such disorders can result from deficient androgen production or action (2), and they are among the commonest congenital disorders in children; the incidence of cryptorchidism and hypospadias at birth ranges from 2–9% (3, 4) and 0.2–0.7% (5) in various countries.

It has been hypothesized that cryptorchidism and hypospadias may represent part of a testicular dysgenesis syndrome (TDS), which also comprises testicular germ cell cancer and some cases of low sperm counts (6) and perhaps other adult-onset disorders such as low testosterone levels (7). This is based on the disorders being risk factors for each other and having shared risk factors, one of which is deficiencies in fetal androgen production or action (6, 7). The latter thus throws the spotlight onto fetal testicular steroidogenesis, especially because recent studies in the rat have established that inhibition of androgen production or action within a discrete fetal time frame will increase the risk of cryptorchidism, hypospadias, and smaller testis size (equates to reduced sperm production) and penis size at puberty or in adulthood (8–10).

TDS disorders may be increasing in incidence. This is certain for testicular germ cell cancer over the past approximately 60 yr (11), and there is some supporting ev-

idence, although more contentious, for the other TDS disorders (6, 12). It is reasoned that any recent increase in TDS disorders is most likely to have environmental and/or lifestyle causes that are, by definition, preventable (7); however, TDS disorders may also arise due to genetic mutations or influences (6). In this context, it has become clear that humans are exposed to a number of widespread environmental chemicals that have the capacity to inhibit testosterone production by the fetal testis in some species (*e.g.*, certain phthalates, certain pesticides). Additionally, a range of widely used therapeutic drugs (*e.g.*, steroid hormones, statins, glitazones) have similar potential. Although these drugs are not usually prescribed to pregnant women, it is possible that a woman taking such drugs may become pregnant and, if unaware of the pregnancy or the risks, continue her medication. In these cases, fetal exposure to such compounds (via the mother) could theoretically inhibit testosterone production by the fetal testis and thus increase risk of downstream TDS disorders. A major obstacle to assessing the risk that such exposures may pose to the developing human male fetus is a fundamental lack of understanding about the regulatory mechanisms for fetal testicular steroidogenesis, their susceptibility to disruption, and their variation between species. The latter is an important issue because, for practical reasons, direct study of steroidogenesis in the human fetal testis is limited, and animal models will therefore be widely used.

These considerations prompted this review, which thus aimed to compare regulation and disruption of steroidogenesis in the human fetal testis with that in rodents (for which most information is available) to establish comparability and/or key differences. The main objective was to provide a guide as to when rodents may, or may not, be good models for the study of fetal testis dysfunction related to masculinization/reproductive development. This should also assist in studies directed at understanding the origins, and possibly the causes, of human TDS disorders.

## II. Scope of This Review

To provide appropriate perspective, the basic cascade of steps in steroidogenesis and their regulation are detailed first, and these form a backdrop to the remainder of the review that considers their susceptibility to perturbation. For the latter, we have chosen therapeutic and environmental compounds to which humans are likely to be exposed and/or for which there is evidence from animal studies that they can disrupt steroidogenesis. In many instances, there is a lack of detailed information available for the fetal testis, and in such instances, use is made of any information that is available for effects on the adult testis; the latter is also described where there is evidence for con-

trasting effects on, or regulation of, testicular steroidogenesis between fetal life and adulthood. Considerable space is devoted to comparison of differences in the basic drive to the fetal testis to stimulate testosterone production because there are fundamental species differences that may have implications regarding relative susceptibility to disruption; comparative analysis of humans and mice deficient in component parts of the hypothalamic-pituitary-testis axis is particularly informative in this regard. Finally, because direct information on modulation of testosterone production in the human fetal testis is extremely limited, wide use is made of fetal masculinization disorders as an index of altered testicular steroidogenesis. This has necessitated provision of background information on how and when such disorders can arise and, in particular, how they may reflect altered androgen action at different fetal ages.

### III. The Steroidogenic Cascade and Its Regulation

#### A. Preferred sources and mobilization of cholesterol

Cholesterol is the precursor of the steroid hormones (13), providing the backbone of the steroid molecule. The biosynthesis of testosterone directly from cholesterol can only occur in the Leydig cells (14) because the adrenal glands are usually only capable of synthesizing the testosterone precursors, dehydroepiandrosterone (DHEA) (sulfate) and androstenedione. Estrogen synthesis in the human fetal placental unit requires fetal adrenal-derived DHEA (sulfate) to be converted to androstenedione [placental steroid sulfatase and type 3 $\beta$ -hydroxysteroid dehydrogenase (3 $\beta$ -HSD) actions], followed by placental aromatase action to produce estrone. Estradiol dehydrogenase [type 1 17 $\beta$ -hydroxysteroid dehydrogenase (HSD17B1)] is the principal reductive 17 $\beta$ -HSD in the placenta and is most efficient at converting estrone to estradiol. Only very limited amounts of testosterone must escape further metabolism (15). Cholesterol can be obtained from within the cell membrane, synthesized *de novo* from acetate, or imported from the circulation in the form of high-density lipoprotein (HDL) or low-density lipoprotein (LDL). HDL, the principal form of circulating cholesterol in rodents, is imported via scavenger receptor class B type 1 (SRB1), which is a cell surface HDL receptor that is expressed in the fetal mouse testis throughout the key period of testosterone production (16, 17). In the human, LDL cholesterol is considered the principal circulating form of cholesterol used by steroidogenic tissues being taken up into these cells via the LDL receptor. The human fetal testis certainly expresses functional

LDL receptors in samples obtained from gestational wk 10 onward, similar to the human fetal adrenal (18). Cholesterol can also be obtained from the conversion of intracellular C2-acetyl units via the activities of 3-hydroxy-3-methylglutaryl coenzyme A (HMG-CoA) synthase and HMG-CoA reductase (19). Testes of 10- to 20-wk fetuses also have the ability to utilize *de novo* synthesized cholesterol for testosterone formation (18); however, similar information on testes before 10 wk is lacking. It is notable that the transcription factor, steroidogenic factor-1 (SF1, NR5A1), a member of the orphan nuclear receptor superfamily that regulates expression of downstream steroidogenic enzymes (see *Section III. E*), also regulates expression of SRB1 (16) and HMG-CoA synthase and HMG-CoA reductase (20).

Because the fetal Leydig cell has various possible routes for obtaining cholesterol, it is perhaps not surprising that blockade/inactivation of any one pathway tends to be without major effect. For example, knockout of SRB1 in mice has no apparent effect on masculinization or male fertility (21). This probably also explains in part why lowering of circulating cholesterol via the therapeutic use of statins has no apparent effect on masculinization (see below). Normal Leydig cells from different species contain vastly different numbers of lipid droplets, with rat Leydig cells containing the fewest. However, because all species are equally efficient at secreting testosterone, this is suggestive that Leydig cells must utilize a number of mechanisms to meet the demand for cholesterol, for example, *de novo* synthesis and possibly immediate utilization of circulating lipoprotein-borne cholesterol (22).

#### B. Cholesterol transport within the Leydig cells

The first step of steroidogenesis requires the transport of free cholesterol from the outer to the inner mitochondrial membrane (23). This is where the first “steroidogenic” enzyme reaction occurs, catalyzed by the CYP11A enzyme (Fig. 1), which is located on the matrix side of the inner mitochondrial membrane (24). Although the outer mitochondrial membrane itself is relatively cholesterol-rich and does not provide a barrier to cholesterol, the space between the outer and inner mitochondrial membranes is filled with an aqueous fluid that only permits the free passage of water-soluble molecules, therefore preventing the passage of lipophilic cholesterol (25). Consequently, the necessary translocation of cholesterol to the inner mitochondrial membrane is facilitated by steroidogenic acute regulatory protein (StAR).

StAR is a short-lived molecule, rapidly synthesized in response to tropic hormones, that actively transports cholesterol from the outer to the inner mitochondrial membrane (26) and allows CYP11A, which is located in the inner membrane, access to cholesterol and as such regu-

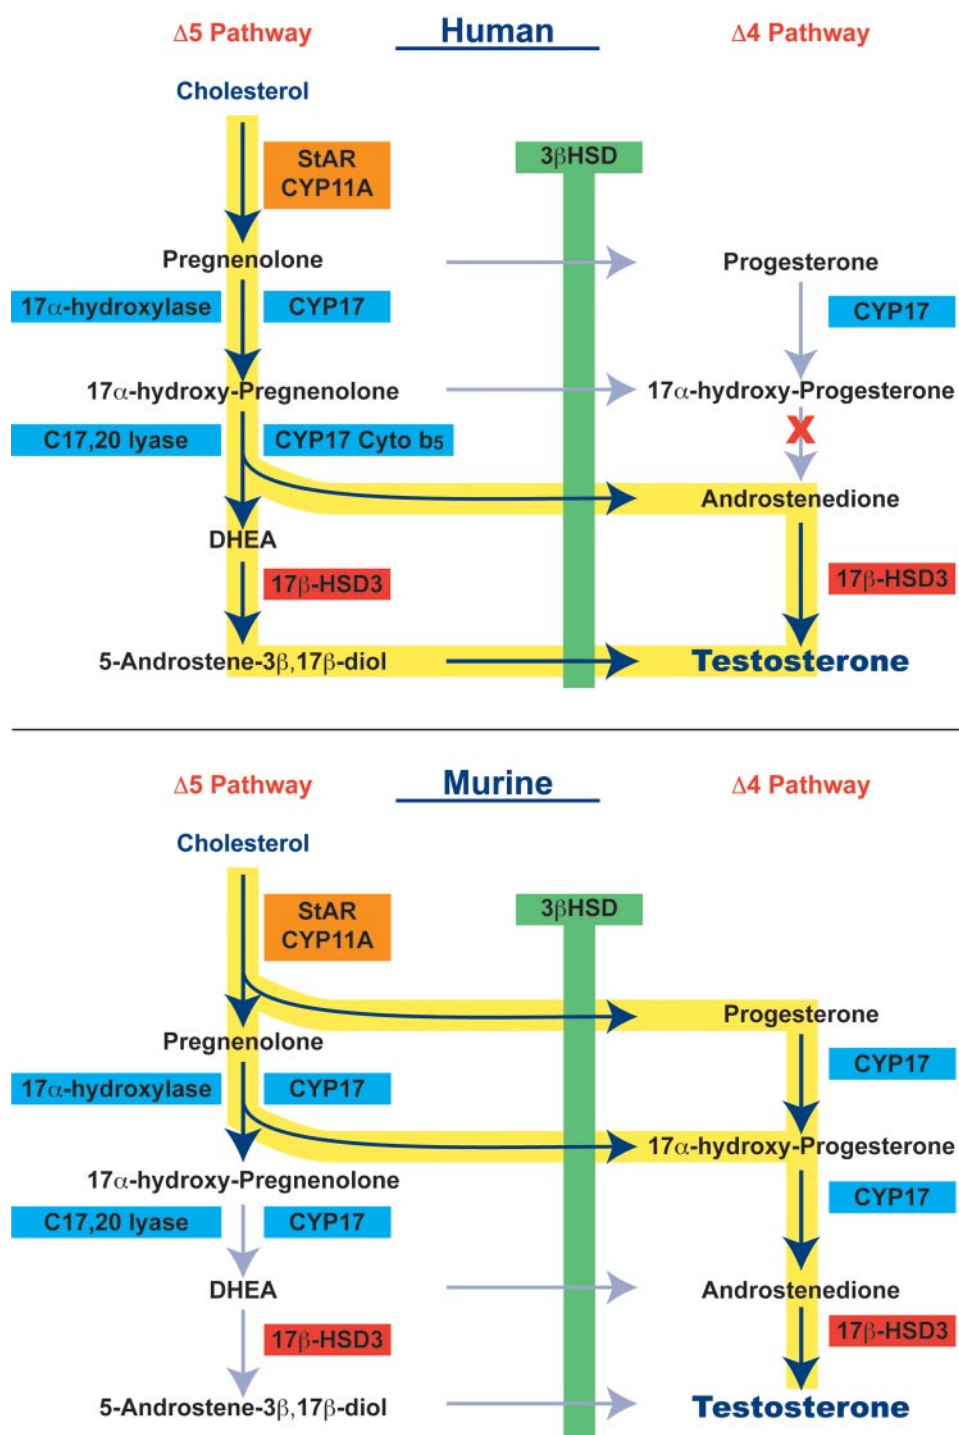

**FIG. 1.** Main components of the steroidogenic pathway in the human (top) and murine (bottom) fetal Leydig cell. The yellow background coloring shows the preferred pathways of steroidogenesis, which differ between human and murine; note that there is still a degree of flexibility in the pathways that can be used. The red X in the top diagram indicates that this reaction does not occur in the human.

lating steroid flux through the pathway (Fig. 1). It has been reported that SF1 and fellow subfamily member liver receptor homolog-1 can regulate StAR by activating the promoters of human StAR, enhancing its expression (27). StAR expression is mainly regulated by LH-mediated activation of cAMP-dependent pathways, which ultimately lead to transcriptional activation (28). StAR protein has

been shown to be a substrate of ERK1/2 (29). Appropriate activation of ERK1/2 in the fetal testis could well be a trigger for fetal testosterone production. Because steroidogenesis is completely dependent on the movement of cholesterol across the intramitochondrial space, it is not surprising that mutations in StAR have dramatic effects on masculinization due to the absence/reduction in testoster-

one production during the masculinization programming window. Thus, absence of StAR protein in 46XY genetic males results in wholly female genitalia as well as congenital lipoid adrenal hyperplasia (30).

The translocator protein TSPO, previously known as peripheral-type benzodiazepine receptor, is a mitochondrial protein also involved in the regulation of cholesterol transport from the outer to the inner mitochondrial membrane. *In situ* and *in vitro* studies have demonstrated that TSPO mediates the StAR-induced cholesterol import into mitochondria. It has also been shown that cell-specific TSPO expression in steroidogenic cells is due, at least in part, to the expression of Sp1/Sp3 transcription factors (31). The role of TSPO in fetal Leydig cell steroidogenesis in early human or rodent gestation remains to be evaluated.

### C. Steroid biosynthetic pathways in Leydig cells

The synthesis of testosterone from cholesterol requires the action of several enzymes (Fig. 1), and these fall into two categories: the cytochrome P450 enzymes, CYP11A and CYP17; and the HSD enzymes, 3 $\beta$ -HSD (HSD3B2 in humans but HSD3B1 in all other species to date) and 17 $\beta$ -HSD [HSD17B3 in the principal sites of testosterone formation, fetal and adult testis, and adult brain, but possibly HSD17B5 (ARK1C3) in other tissues of adults] (32). The P450 enzymes catalyze the hydroxylation and cleavage of the steroid substrate utilizing molecular oxygen and nicotinamide adenine dinucleotide phosphate (reduced) (NADPH) as the source of reductive potential (32). The HSD enzymes catalyze the oxidation and/or reduction of steroid hormones and respectively require nicotinamide adenine dinucleotide (oxidized) and/or NADPH as electron acceptor/donor (32). Whereas each P450 enzyme is the product of a single gene, the HSD enzymes have several isoforms, each the product of a distinct gene (32).

Once cholesterol has been transported to the inner mitochondrial membrane, the first of several enzymatic reactions take place. The initial steroidogenic enzyme, CYP11A, cleaves the side chain of cholesterol (a C27-steroid) generating the C21 steroid, pregnenolone (33) (Fig. 1). This is the first step and the rate-limiting enzymatic step in testosterone biosynthesis (32, 34). Pregnenolone then passes from the mitochondria to the smooth endoplasmic reticulum, where the remaining enzymatic reactions occur (35). There is little, if any, evidence that a specific carrier protein is required for pregnenolone exit from the mitochondria; for example, monkey transformed kidney (non-steroidogenic) COS-1 cells transfected with CYP11A readily allow egress of pregnenolone into the medium (36). It is thought that CYP11A deficiency is incompatible with human pregnancy and consequently 46XY genetic males with haploinsufficiency and/or partial inactivation

of CYP11A are the only cases to have been reported (37, 38), although this can include major deficiencies in masculinization (37). CYP11A deficiency has been observed in rabbits, giving rise to congenital lipoid adrenal hyperplasia (39); however the newborn  $-/-$  homozygotes do not survive.

### D. Conversion of pregnenolone to testosterone

The combined enzymatic actions of 3 $\beta$ -HSD and CYP17 catalyze the overall conversion of pregnenolone to androstenedione, the precursor of testosterone. This conversion can occur down one of two main pathways, either via  $\Delta^5$  steroid pregnenolone and its intermediates, 17 $\alpha$ -hydroxypregnenolone and DHEA, or via  $\Delta^4$  steroid progesterone and its intermediate, 17 $\alpha$ -hydroxyprogesterone (40) (Fig. 1). It is also possible to converge from the  $\Delta^5$  to the  $\Delta^4$  pathway (Fig. 1). Although the steroid biosynthetic pathway in the Leydig cell is the same in humans and rodents, there is a preference for either the  $\Delta^4$  or  $\Delta^5$  pathways, and this may be both species- and age-dependent (41). Species differences in preferred pathway ( $\Delta^4$  or  $\Delta^5$ ) are likely to depend upon relative substrate affinity of the CYP17 enzyme (41). In the human and higher primates, the  $\Delta^5$  pathway predominates in the adult (42–45) and fetal testis (46) because the human CYP17 enzyme readily converts 17 $\alpha$ -hydroxypregnenolone to DHEA but has little 17,20-lyase activity when 17 $\alpha$ -hydroxyprogesterone is the substrate (Fig. 1) (47). In the rat, CYP17 readily cleaves both the  $\Delta^4$  and  $\Delta^5$  C<sub>21</sub> steroids (48), but in contrast to the human, has a preference for the  $\Delta^4$  pathway (Fig. 1) (49–51). All routes of conversion require 3 $\beta$ -HSD and CYP17, and because CYP17 sequentially catalyzes both 17 $\alpha$ -hydroxylase and 17,20 lyase activities (Fig. 1), it is regarded as the qualitative regulator of steroidogenesis (1).

The final step in testosterone synthesis is catalyzed by a reductive 17 $\beta$ -HSD, to reduce androstenedione to testosterone (Fig. 1). There are multiple reductive 17 $\beta$ -HSDs, but the type 3 is vitally involved in adult testis function (52). It also seems likely that this same enzyme has a role in the fetal Leydig cell, although a possible role of the type 5 17 $\beta$ -HSD (AKR1C3) in the fetal Leydig cell cannot be dismissed.

### E. Regulation of steroidogenic enzymes

The majority of what is known about the regulation of steroidogenic enzymes in both the human and rodent derives from studies of postnatal or adult testes. There is little information on the regulation of gonadal steroidogenic enzyme expression during the first trimester of human development (53) or in fetal rodents. It is important to emphasize that fetal and adult Leydig cells arise from distinct lineages, and there are several morphological and func-

tional differences between the two cell types (34). The fetal Leydig cells are responsible for fetal and neonatal masculinization, after which they regress. The adult Leydig cells, which emerge around postnatal d 10 in the rat (54, 55) and at the beginning of puberty in the human (56), are required for pubertal masculinization (34).

Cell-specific expression of the P450 enzymes is dependent on expression of SF1 (57, 58), which binds to the proximal promoter region of all P450 enzymes (59). SF1 is essential for CYP17 expression in gonadal cells (60), but other factors may then determine maximal and cell-specific expression of the P450 enzymes (32). For example, chronic but not acute LH stimulation leads to activation of adenylate cyclase and consequent increase in cAMP, which initiates the increased synthesis of steroidogenic P450 enzymes (61). Expression of CYP17 is unique in that it depends solely on cAMP stimulation in adult Leydig cells (62, 63), and although this might apply to fetal Leydig cells in the later stages of gestation in rodents, it is obvious that other factors must be involved before the ontogeny of LH action (see below).

Species differences in the regulation of CYP11A activity are apparent between postnatal rats and mice based on studies using cultured Leydig cells. In mouse Leydig cells, CYP11A activity is at maximal capacity during short-term LH stimulation but can be inhibited after chronic stimulation. Immature rat Leydig cells, however, are running at only a fraction of their potential CYP11A activity during short-term LH stimulation, and this is unaffected by long-term LH action (64). This could suggest that mouse CYP11A activity is more susceptible to perturbation because it is already running at full capacity. Because CYP11A activity is the rate-limiting step of testosterone biosynthesis (32), any interference at this step could compromise the whole pathway. In neonatal rat Leydig cells, high doses of human chorionic gonadotropin (hCG) stimulate CYP17 mRNA levels, but in the adult Leydig cell, CYP17 mRNA levels are reduced in response to high hCG doses (65). This LH/hCG-induced down-regulation is an established feature difference between adult and fetal type Leydig cells in rodents and in humans (66), and it is thought to be one way in which adequate fetal testosterone synthesis is ensured for masculinization (67).

In addition to the P450 enzymes, Leydig cell expression of  $3\beta$ -HSD also appears to be dependent upon SF1 (32). There is an SF1 response element in the proximal promoter region of the human type 2 (gonadal/adrenal)  $3\beta$ -HSD gene (68), and the mouse type 1 gonadal/adrenal  $3\beta$ -HSD promoter has three potential SF1 consensus binding sites (69). Differences have been shown in the way that cultured rat and mouse Leydig cells respond to cAMP. In mouse Leydig cells, cAMP stimulates testosterone production,

which then suppresses  $3\beta$ -HSD mRNA (70), whereas addition of LH or cAMP to cultured rat Leydig cells increases  $3\beta$ -HSD mRNA, protein, and activity after 24–72 h (71).

It is currently unknown whether gonadal  $17\beta$ -HSD(s) is/are regulated by SF1. Studies using hpg and testicular feminized (*tfm*) mice have shown that in early postnatal development, gonadal  $17\beta$ -HSD expression is independent of gonadotropin stimulation, but after puberty it is dependent upon gonadotropins and androgen action (72). Consequently, it has been suggested that androgens are required transiently to ensure optimal  $17\beta$ -HSD expression during adult Leydig cell development (41). In the fetal mouse, type 3  $17\beta$ -HSD is expressed in the Sertoli cells and not in the fetal Leydig cells, whereas at puberty  $17\beta$ -HSD expression relocates to the adult-type Leydig cells (73). It is unclear whether this cellular switch in  $17\beta$ -HSD expression is peculiar to the mouse or has counterparts in other species.

In view of the critical role that SF1 plays in ensuring expression not only of key genes in the steroidogenic pathway, as discussed above, but also in the development of the adrenal gland and testes in both mice and humans (74–76), it is not surprising that 46XY individuals with mutated SF1 have XY sex reversal (77, 78) or ambiguous genitalia (79), indicative of disrupted fetal testosterone biosynthesis and masculinization.

#### IV. Steroidogenesis by the Fetal Testis and Species Differences

##### A. Role in masculinization, regulation, and timing

The timing and evolution of steroidogenesis by the fetal testis are well described for humans and rodents (see below), but the finer details as to what initiates the onset of steroidogenesis and regulates it in early fetal life are still not definitive, although enough is known to recognize some fundamental differences between the human and rodents. These differences are best appreciated by considering the normal endocrinology of the developing male fetus and how testosterone levels change in relation to potential stimulatory hormones [LH, chorionic gonadotropin (CG)]. In evaluating this information, it should be recognized that absolute and relative hormone levels at different gestational ages depend to a large extent on the compartment in which they are measured, and this is particularly the case for testosterone in the human. For example, it is clear that measurement of testosterone levels in maternal blood in pregnancy is not an accurate guide to fetal levels (80), and although measurements in umbilical cord blood are more accurate, most such measurements are made at birth, at which time testosterone secretion by the human male fetus is relatively low and does not reflect levels ex-

perienced earlier in gestation during the period of masculinization (Fig. 2) (81–83). Amniotic fluid (AF) is presumed to provide a more accurate measure of fetal hormone levels, and, in general, relative changes in testosterone or of LH and hCG in this compartment appear comparable to those in fetal blood (82, 84, 85). Finally,

although the testosterone that circulates in blood is of primary importance for masculinization of the reproductive system in males, measurement of levels within the testis should also capture this on the presumption that the testis is the main source of circulating testosterone. Intra-testicular testosterone (ITT) is commonly reported in the

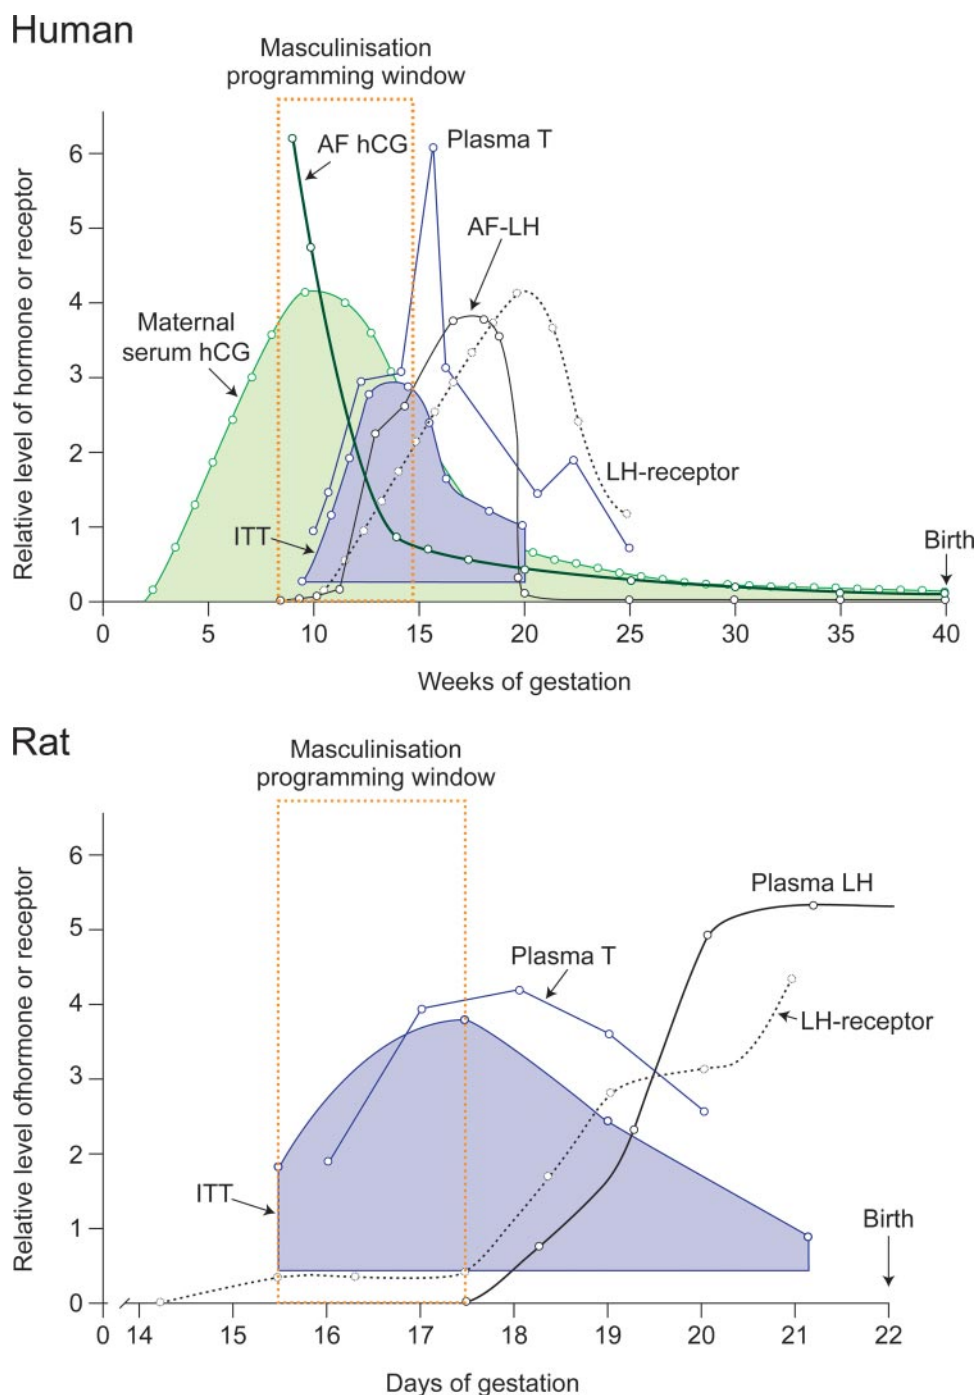

**FIG. 2.** Onset of testosterone production by the fetal testis in the human (top) and rat (bottom) in relation to the ontogeny of LH secretion, LH receptor appearance in the testis, production of hCG (in the human), and the time window in which masculinization of the reproductive tract by androgens occurs (masculinization programming window) (9). Note that both ITT and plasma testosterone levels are illustrated. In the human, hCG levels are shown in both maternal serum and AF to illustrate that hCG passes readily into AF (indicating fetal exposure). Note that in the rat, but not the human, coavailability of LH receptor and a suitable ligand (CG or LH) does not occur during the masculinization programming window, indicative that testosterone production during this time window is LH receptor-independent. For each parameter, each point indicates a data point or average value derived from one or more studies in the literature (8, 9, 80, 82–84, 88, 94, 102–104).

rat in terms of total content per testis (86), whereas the majority of data available for the human has expressed it per unit weight of testis (83). The latter is arguably a better measure anyway because the testis grows more than 8-fold during the period of masculinization in both the rat (H. M. Scott, unpublished data) and human (83), and so the content of testosterone per testis will increase because of this, which could be misleading. Therefore, in the comparison of human and rat in this review, ITT per unit weight of testis has been used as the comparator (Fig. 2), although it is recognized that variation in Leydig cell number/concentration according to species and age will affect this parameter.

### B. Ontogeny of testosterone secretion by the human fetal testis

In the human male, the fetal Leydig cells begin to produce testosterone at around 8 wk gestation (87), and production peaks at around 11 or 12 to 14 wk gestation as determined by measurements in the testis (83, 88) and fetal blood (Fig. 2) (82). Between 12 and 20 wk, serum testosterone levels in the male fetus are between 3- and 8-fold higher than in the female (80, 89). However, at the individual level, there is not always a clear separation between testosterone levels in male and female fetuses, especially when measurements are made in AF (80, 90, 91). One study has shown that blood testosterone levels begin to decrease at 17 wk (92) (Fig. 2), whereas another demonstrated that testosterone levels gradually decrease at around 20 wk (89). Both studies concluded that by term, there are no differences in blood testosterone levels between the male and female fetus (89, 92), although not all studies agree (93).

Production of hCG in human pregnancy peaks between 8 and 12 wk gestation (94, 95), in a similar pattern and concentration in both maternal serum and AF (Fig. 2), indicative of direct hCG diffusion from the placenta (95). Direct measurement of hCG in fetal blood confirms that levels are high (and independent of fetal sex), although they are approximately 3-fold (<12 wk gestation) and approximately 9-fold (12–29 wk) lower than corresponding levels in AF (84). A similar temporal pattern of change in CG has been shown in the chimpanzee during pregnancy (83). The LH receptor is first reported in the human fetal testis at around wk 10, and maximal LH receptor binding capacity is attained between 15 and 20 wk (Fig. 2) (96). At 12 wk, when hCG levels begin to decline, LH secretion is first detected and begins to rise, such that levels in blood and AF (84) peak at around 16 wk (Fig. 2). However, it is important to note that although hCG levels are declining at a time when LH levels are increasing, data from radio-receptor assays (97) and *in vitro* bioassays (98) have

shown that CG is two to six times more potent than LH on a weight basis, so hCG may still be a more important ligand than LH for stimulating steroidogenesis at 15–20 wk.

As will be clear from data discussed below, it is evident that LH receptor-mediated drive is essential for testosterone production by the normal human fetal testis, although it remains unclear whether testosterone production at very early fetal ages (7–10 wk) is partially or completely LH/CG-independent (Fig. 3). Although there are no direct reports of LH receptor protein expression before the time of onset of testosterone production (7–10 wk; Fig. 2), *in vitro* studies with human fetal testis explants have shown LH/hCG-responsiveness of steroidogenesis at 7–12 wk, suggesting that functional LH receptors are already present (99). However, the same authors have also shown that testis explants from fetuses at approximately 7 wk gestation do not require LH/hCG stimulation to maintain *in vitro* testosterone production, although addition of retinoic acid will increase secretion at this age but not at later ages (100). Therefore, from the available data, it is evident that steroidogenesis by the human fetal testis could be regulated by hCG, LH, or paracrine factors, retinoic acid being one such possibility for the latter.

### C. Ontogeny of testosterone secretion by the rat fetal testis

The set-up in the male rat fetus is markedly different from that in the human, primarily because the rat does not produce CG (101). Testicular testosterone production starts at embryonic day (e) 14.5–e15.5 (102, 103), at around the same time that detectable LH receptors first appear (86, 104), although levels of LH receptor at this time may be markedly lower than between e18.5 and e21.5 (Fig. 2). Testosterone concentrations in the testis (Fig. 2) (9) and in blood (105, 106) show a modest peak at around e16.5–e17.5, although in most studies ITT levels have been expressed as content per testis, and this shows a more pronounced peak at a later age (e18.5–e19.5) (9, 102, 107). In studies in which whole body testosterone levels were measured, the fetal testosterone peak also occurred at e18.5–e19.5 (108). It was also reported that whole body testosterone levels were significantly higher in males compared with females, on these 2 d alone, and on e16, e17, e20, and e21, they were described as being the same (108). Despite the earlier presence of LH receptors, LH secretion does not start until e17.5 and reaches its peak at e20.5–e21.5 (Fig. 2) (109). In fact, evidence suggests that hypothalamic control of gonadotropic function is not operative until d 19 of fetal life (110, 111). Consequently, it is clear that neither CG (because it is not present) nor LH can be responsible for initiating the onset or regulating the early phase of testicular steroidogenesis. It is therefore pre-

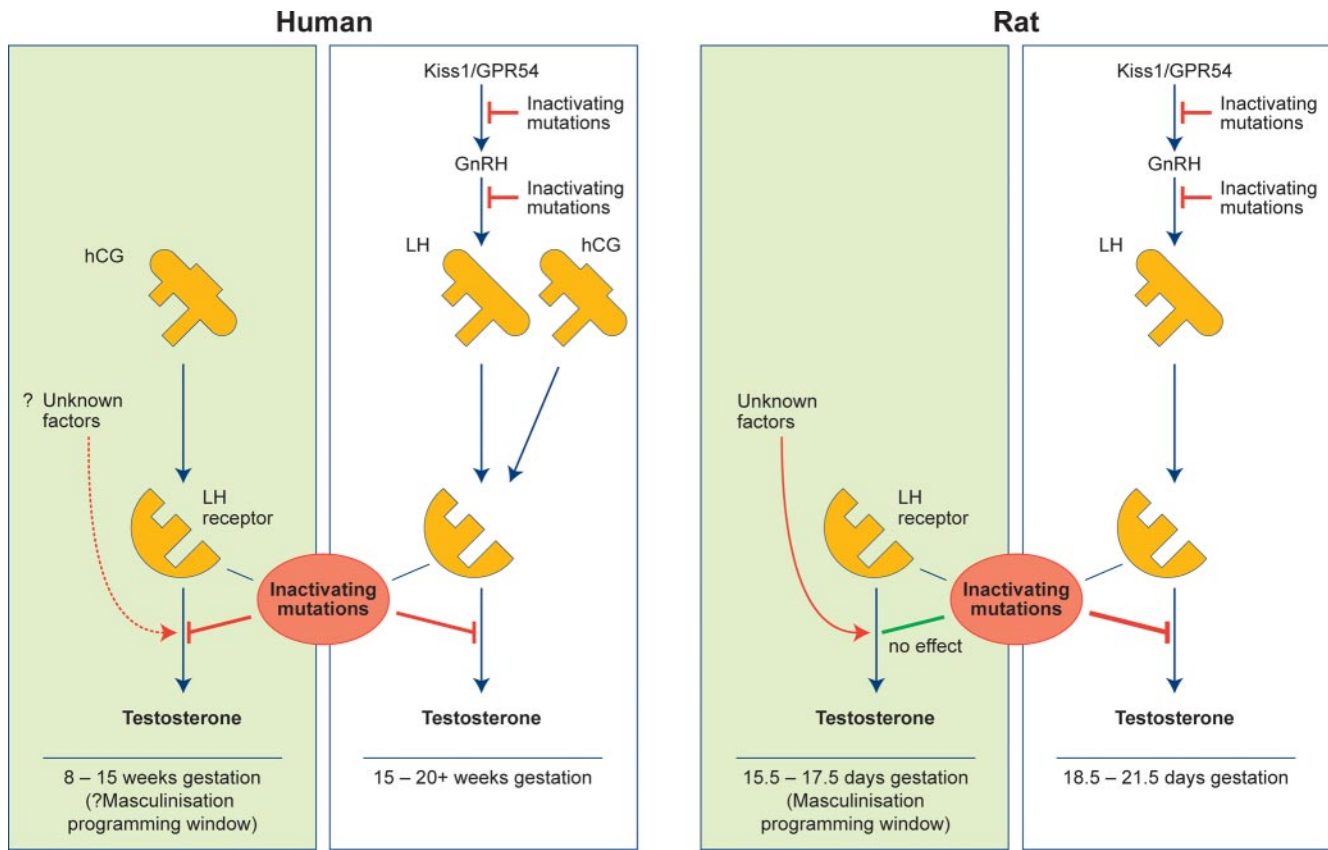

**FIG. 3.** Diagrammatic representation of the regulation of testicular steroidogenesis during the masculinization programming window (in early gestation) and in the period following this (in later gestation) in the human and rat. The impact of inactivating mutations in genes encoding key component parts of the hypothalamic-pituitary-testicular axis and whether this is able to block (red bars) steps in the pathway of regulation is also illustrated. Details are provided in the text. Kiss1, Kisspeptin 1.

sumed that regulation of steroidogenesis by the fetal rat testis is fundamentally different from that in the human and is regulated either autonomously or by paracrine factors (112) before the onset of LH secretion (Fig. 3). This conclusion is reinforced by experimental studies involving absence of LH or LH receptors (see below). Nevertheless, it is established that the LH receptors that are expressed before appearance of LH are functionally coupled because stimulation of fetal rat testis explants at e14.5 with LH/hCG is able to stimulate testosterone secretion (113).

The identity of the putative paracrine stimulators of testosterone production by fetal rodent Leydig cells is unclear, but several factors have been identified that can stimulate testosterone production by the fetal rat testis *in vitro* (Table 1). The role and importance of these factors *in vivo* is not known, and it is possible that a “fail-safe” mechanism operates such that any one of a number of factors can stimulate steroidogenesis so as to ensure masculinization. Whether these factors play a role in the human fetal testis is unknown, but retinoic acid, which stimulates testosterone production by fetal human testes at a comparably early age (100), has only inhibitory effects on steroidogenesis by rat fetal testes (114).

**D. Relationship between testosterone production by the fetal testis and masculinization**

Sexual differentiation and masculinization are terms that are sometimes confused (especially in the older literature) and can lead to ambiguous meaning or interpretation. Formation of a phenotypic normal male involves a cascade of changes initiated genetically by activation of the SRY gene. This leads to testis formation, and subse-

**TABLE 1.** Factors shown to stimulate steroidogenesis by the fetal rat testis *in vitro* and which are therefore potential candidates for paracrine regulation of steroidogenesis during the masculinization programming window (e15.5–e17.5)

| Factor                | Fetal age | Refs.    |
|-----------------------|-----------|----------|
| IGF-I <sup>a</sup>    | e16.5     | 439      |
| PACAP-27 <sup>b</sup> | e18.5     | 440, 441 |
| VIP <sup>b</sup>      | e18.5     | 442      |
| ANP <sup>b</sup>      | e18.5     | 443      |
| BNP <sup>b</sup>      | e18.5     | 443      |
| CNP <sup>b</sup>      | e18.5     | 443      |

<sup>a</sup> IGF-I production detectable within the fetal rat testis from e16.5; IGF-I also increased the numbers of fetal Leydig cells.  
<sup>b</sup> Receptors for these compounds also shown to be present from e15.5.

quent testosterone production by the latter then leads to bodywide masculinization. The term sexual differentiation is generally used to describe the moment when a recognizable testis is first formed because this is the very first point at which a fetus can be morphologically distinguished as being a male (115, 116). Masculinization refers to the process via which the sexually indifferent fetus with a testis is then transformed into a phenotypic male with internal and external male genitalia, which cannot occur until testes have differentiated and begun to secrete hormones (117). Therefore, masculinization follows sexual differentiation but is separate from it. Thus, a genotypic male (XY) fetus can undergo sexual differentiation and form a testis but fail to completely masculinize, as occurs in CAIS, or a genotypic female (XX) fetus without a testis can masculinize if exposed to sufficient androgens (1). Because much of the masculinization process involves androgen action and the main source of androgens is the fetal testis, disorders of androgen-dependent masculinization can provide a “read-out” of fetal testicular steroidogenic function. Regression of the Müllerian duct in the male fetus under the influence of anti-Müllerian hormone will not be considered in this review because this does not involve steroidogenic function of the fetal testis. It should also be noted that masculinization of the fetus is only the first, although most important, step toward formation of a phenotypic male because androgen production/action

postnatally, and especially at puberty, is also essential for this to happen.

Masculinization of the reproductive tract involves the differentiation of the internal (epididymis, vas deferens, seminal vesicles, and prostate) and external (penis, scrotum, and perineum) genitalia (118), but these events do not occur synchronously. The prostate forms from gestational wk 10–13 in the human (83) and e18.5–19.5 in the rat (119). The penis forms through wk 11–13 in the human (83) and beyond e17.5 in the rat (120). The seminal vesicles develop over the period of 14–16 wk in the human (121) and at e19.5 in the rat (120). The androgen-dependent phase of testis descent into the scrotum occurs much later in gestation, during wk 27–35 in the human (122, 123) and during postnatal wk 3 in the rat (124). Once the reproductive tract structures have differentiated as the result of androgen action, their continued growth may also be driven by testicular androgens, as is the case for example for elongation of the penis postnatally (Fig. 4) (10, 125–127). This is an important point because some studies in humans that may involve androgen deficiency at various gestational ages may not have distinguished masculinization of the phallus (*i.e.*, formation of a penis) from its subsequent growth (*e.g.*, micropenis), and this could lead to misleading interpretations. Masculinization of the brain, which will not be discussed in this review, occurs late in gestation in primates (128) and perinatally in rodents (129, 130).

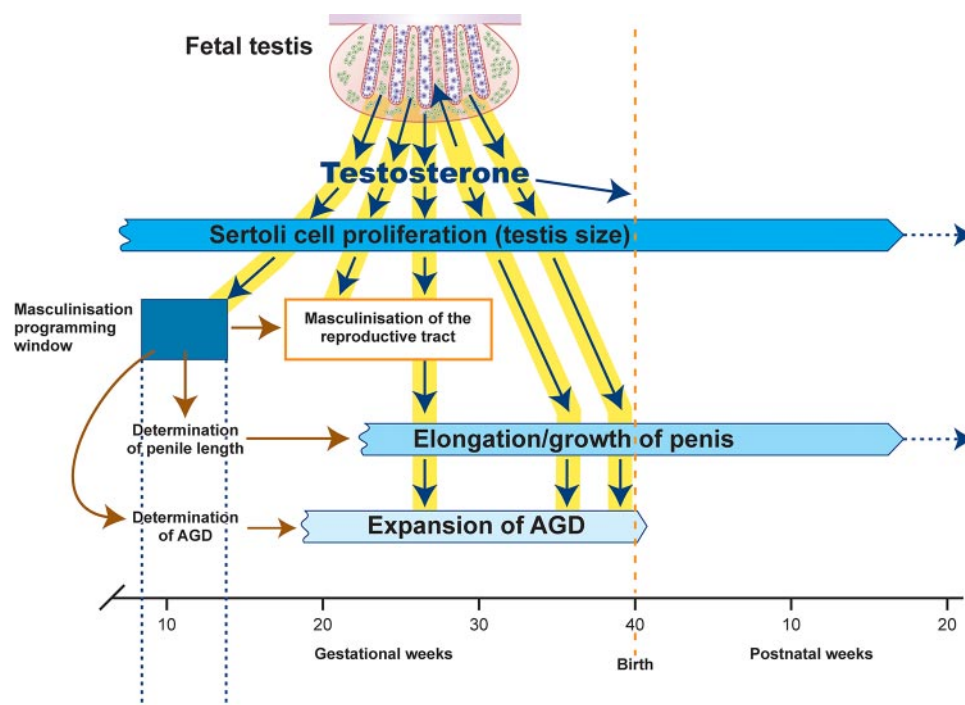

**FIG. 4.** Illustration of the main effects of fetal testicular testosterone (or other androgen metabolites) in relation to the stage of gestation and the masculinization programming window. Note that androgen action within the masculinization programming window is what sets up normal development of the penis and AGD in males (*i.e.*, determines what size they will grow to) but that it is androgen action after this time window, and extending into the postnatal period, that is responsible for realizing this growth (9, 10). In contrast, testosterone-driven proliferation of Sertoli cells is independent of the masculinization programming window and extends also into the postnatal period (8).

It has been widely assumed that androgens induce masculinization of the reproductive tract at around the time that these structures morphologically differentiate and thus appear different from those in the female. One consequence of this assumption was that researchers investigating the mechanisms of androgen-dependent masculinization in rodents have concentrated on the later period of gestation (e.g., e18.5–e21.5 in the rat). However, recent studies in the rat have shown that the critical window for androgen-dependent masculinization (e15.5–e17.5) actually precedes the morphological differentiation of the structures (Fig. 4), and this has been termed the “masculinization programming window” (9). This period therefore coincides with the very start of testosterone production by the fetal rat testis, when LH is not present and the stimulus for testosterone production is presumed to be paracrine (Figs. 2 and 3). It is thought that a similar masculinization programming window occurs in the human and is predicted to be approximately 8–12 wk gestation (9) (Figs. 2–4). It has been shown that if there is insufficient testosterone production/action during the masculinization programming window in the fetal rat, it can result in disorders of masculinization such as lack of formation of the penis or its malformation (hypospadias), cryptorchidism, an underdeveloped prostate and reduced anogenital distance (AGD) and penis length (9, 10). In contrast, blockade of androgen action after the masculinization programming window in the rat, when both LH and the LH receptor are expressed (Fig. 2), does not affect the masculinization process, but may affect elongation of the penis (9, 10) or testis size (due to reduced Sertoli cell number) (Fig. 4) (8, 107). It has therefore become evident that the mechanisms that regulate testicular testosterone production, before regulation by LH, are of paramount importance in the rat (Fig. 2) because it is likely that it is these mechanisms that are disrupted when testosterone production is reduced, resulting in disorders of reproductive tract masculinization. Arguably, AGD provides the simplest and least invasive measure of reduced androgen exposure during the masculinization programming window (9, 10).

It is also important to note that the difference between external genitalia being undermasculinized (*i.e.*, penis formation is abnormal, as in hypospadias) and underdeveloped (*i.e.*, of subnormal length as in micropenis) is likely to be the result of androgen deficiency in two different periods (10, 131): the former, during the masculinization programming window, and the latter, after this window, including after birth (Fig. 4). Therefore, the type of genital abnormality that is present may provide information as to when the deficiency in androgen action occurred. This has relevance when considering evidence from natural mutations, in humans and animals and in transgenic animal

models, that affect LH or the LH receptor, although it should also be remembered that hypospadias may occur for reasons other than deficient androgen production/action (132). Similarly, although cryptorchidism is usually taken to indicate deficient hormone action, this may involve insulin-like factor 3 as well as androgens (133). Because the diagnosis and reporting of cryptorchidism is also problematical (133), it will not be considered in this review as a potential guide to fetal androgen production/action.

## V. Inferences Regarding Regulation of Fetal Steroidogenesis from Masculinization Defects in Humans and Animals

### A. Effects of anencephaly (LH deficiency)

Anencephaly is the consequence of a neural tube defect that results in the absence of a major portion of the brain. As such, it has been equated with the absence of the hypothalamus and pituitary gland and consequent absence of LH. Although there have been suggestions that this is an overinterpretation and that varying amounts of pituitary tissue may be present in anencephalic fetuses (134), it is generally agreed that they are LH deficient (135). Despite having absent or low levels of pituitary LH, human anencephalic male fetuses are still able to undergo normal masculinization of the reproductive tract and external genitalia, indicative of normal testicular function and androgen production, at least during early gestation and encompassing the masculinization programming window (Fig. 3). However, although the penis and scrotum are normally differentiated, they are often small and the testes are often undersized (136–139). This implies that although testosterone synthesis in early gestation is normal (probably driven by hCG; see below), once hCG secretion starts to diminish at 12–15 wk gestation (Fig. 2), levels are no longer sufficient to compensate for the absence of LH, so androgen-dependent growth of the external genitalia is compromised (134). This is consistent with evidence from the rat that penis formation is regulated exclusively by androgen action during the (early fetal) masculinization programming window, whereas its subsequent elongation/growth in size is regulated by androgen action in late gestation as well as after birth (10, 131), and the same appears to apply to the human (118, 131) and nonhuman primate (125) insofar as data are available (Fig. 4). Nevertheless, because anencephalics will also lack pituitary hormones other than LH, it is not possible to draw definitive conclusions based on such examples.

These findings imply that the human fetal testis does not come under control of its hypothalamic-pituitary system until later in gestation (Fig. 3), by which time masculinization has occurred and the high levels of hCG have

declined (134). Some anencephalics are reported to have normal-sized genitalia, but it is likely either that these individuals have a greater portion of undamaged pituitary or that their mothers have higher levels of hCG that are able to compensate for low LH levels later in gestation (140).

The anencephalic state in the human has been recapitulated experimentally in animal models using *in utero* hypophysectomy to investigate the role of gonadotropic hormones in the regulation of fetal testicular testosterone synthesis. In fetal mice, hypophysectomy using x-ray irradiation before reproductive tract differentiation was followed by normal masculinization at birth (141). Additionally, transgenic mice, which are null for the thyroid-specific enhancer-binding protein (*Tlebp* or *Nkx2.1*) gene and which do not develop a pituitary gland, are normally masculinized at birth (142). There have been several studies in which fetal rats have been hypophysectomized *in utero* by decapitation. Rats that were decapitated in early sexual differentiation were described as having slight underdevelopment of the reproductive tract at birth (141). Although this phenotypic description does not elucidate whether the rats were normally masculinized but underdeveloped, other more recent studies have revealed that the fetal decapitation of rats from e16.5 onward does not affect normal masculinization (Wolffian ducts develop normally and AGD is comparable to controls) and that testosterone production is only reduced in animals decapitated after e19.5 (143, 144); this suggests that testosterone synthesis is independent of LH stimulation before e19.5 (Fig. 3). A study of the pituitary-gonadal axis by measuring plasma LH and testosterone in normal fetal rats and those that had been castrated and then exposed to either flutamide or ethylene dimethane sulfonate also demonstrated that testicular feedback regulation of LH is functional from e19.5 onward (145). Although early data using fetal rabbits hypophysectomized by decapitation on gestational d 19 reportedly resulted in absent or minimal virilization of the prostate and external genitalia (146), more recent experimentation has led to the general consensus that the onset of testosterone biosynthesis and resulting differentiation of the reproductive tract in rabbits occurs in the absence of gonadotropins (147–149) as it does in rats and mice.

These data suggest that the steroidogenic function of fetal mouse, rat, and rabbit testes is independent of fetal pituitary hormones, at least during the initial period of testosterone production (Fig. 3). The current evidence suggests that humans and rodents all seem to masculinize normally in the absence of a pituitary or pituitary LH, although there are some remaining uncertainties due to ambiguities in terminology used by earlier authors. These have largely been dispelled by more recent studies that have used naturally

occurring models of LH (and FSH) deficiency or comparable models achieved via transgenesis.

## B. GnRH and kisspeptin/GPR54 mutations

Hypogonadotropic hypogonadism encompasses a number of conditions typified by dysfunction of the hypothalamus and/or pituitary, which leads to an inadequate/absent production of gonadotropins, most importantly LH. Hypogonadotropic hypogonadism is characterized by a delay or absence of pubertal development secondary to gonadotropin deficiency (150). Although the majority of patients with hypogonadotropic hypogonadism have a GnRH deficiency (151), only one male has been identified as having an inactivating GnRH gene mutation, and he presented with normal masculinization at birth but with microphallus and absence of puberty (152). Kallmann syndrome is a disorder resulting from the failed migration of GnRH neurons from the olfactory placode to the hypothalamus; this failure of migration of GnRH neurons results in overt GnRH deficiency. In addition to hypogonadotropic hypogonadism, these patients usually present with anosmia. The phenotype of an individual depends on the gene that is mutated. Mutations in a number of genes have been associated with Kallmann syndrome and hypogonadotropic hypogonadism. Loss of function mutations in the X-linked KAL1 gene have been shown to cause severe hypogonadotropic hypogonadism (153–155), whereas loss of function mutations in the autosomal dominant fibroblast growth factor receptor type 1 (FGFR1) gene (KAL2) produce a far more variable hypogonadotropic phenotype (155–157). Mutations in either of these genes, however, have only been found in approximately 20% of affected individuals (158). More recently, loss of function mutations in the prokineticin 2 (PROK2) gene, which encodes a secreted peptide responsible for regulating the development and migration of the olfactory tract and GnRH neuron progenitors, have been associated with Kallmann syndrome and hypogonadotropic hypogonadism (159). Mutation of the PROK2 gene also results in a variable phenotype, with both nonanosmic and anosmic forms of hypogonadotropic hypogonadism (159). There is also evidence that mutations of the gene encoding the prokineticin receptor-2 may also be involved in Kallmann syndrome (160). As such, these two genes have been grouped together as KAL3.

Other genetic mutations associated with hypogonadotropic hypogonadism include GnRH receptor 1 mutations that are evident in 40% of patients with autosomal recessive, normosmic hypogonadotropic hypogonadism (161, 162) and a spectrum of loss-of-function mutations of the G protein-coupled receptor 54 (GPR54) (163–165). To date, no inactivating mutations of the ligand (Kisspeptin 1) for the GPR54 have been reported (166). Although

hypogonadotropic hypogonadism is characterized by a delay or absence of pubertal development, in many cases it can be diagnosed shortly after birth by the presence of a micropenis and/or cryptorchidism and subnormal levels of LH and FSH (163, 167). GnRH secretion commences in the second trimester of human fetal development (168), which is subsequent to the predicted masculinization programming window (Fig. 2), so masculinization is essentially complete by this time (Fig. 3). Because testosterone production before the start of GnRH secretion must be independent of GnRH stimulation, this explains why there are no reports of incomplete masculinization associated with hypogonadotropic hypogonadism (Fig. 3). However, in fetal males, a functional hypothalamic-pituitary-gonadal axis is necessary for penile growth (Fig. 4), and possibly also for testicular descent. Consequently, any defects in the hypothalamic-pituitary-gonadal axis during the second and/or third trimesters may result in micropenis (131, 169).

In mice, a naturally occurring deletion in the GnRH gene renders them hypogonadotropic (*hpg*), with a near-total deficiency of LH (170). Despite this LH deficiency, *hpg* mice are normally masculinized at birth (171), although there are no reports of whether the size of external genitalia is affected at this stage. ITT levels in *hpg* mice are normal throughout fetal life and on the day of birth (170), implying that LH is unnecessary to maintain testicular steroidogenesis even late in gestation. This does not necessarily mean that fetal testosterone production is LH-unresponsive until birth because LH and full-length LH receptor transcripts are expressed from e16 (170, 172) and LH has been shown to stimulate testicular testosterone production by fetal testes *in vitro* at this age (172, 173). This suggests that testosterone production in late gestation may be under dual control (170), but whether LH action is absolutely necessary for normal testosterone production is doubtful. As outlined above, recent findings have shown that as long as the fetus is exposed to sufficient testosterone during the masculinization programming window, it will masculinize normally (9, 10), and the masculinization programming window spans the fetal period before secretion of LH in rodents (Figs. 2 and 3). This implies that even if testosterone levels were reduced during late gestation in rats or mice due to absent/deficient LH secretion, this should not have any effect on masculinization *per se* (Fig. 3). This has been demonstrated in fetal rats decapitated at either 16.5 or 18.5 d post coitum, which despite having reduced testosterone concentrations (–56% in plasma and –67% in testes), displayed normal Wolffian duct growth and AGD elongation (144). It is likely, however, that a reduction in testosterone levels in late gestation may reduce penile elongation (10, 131) and reduce testicular

size due to reduced Sertoli cell numbers because proliferation of these cells is driven by testosterone primarily during the late phase of gestation (Fig. 4) (8, 107).

Other mouse models of hypogonadotropic hypogonadism include at least four GPR54 transgenic mice lines (165, 166, 174, 175), and two Kiss1 transgenic mice lines (166, 176, 177). These mice are all normally masculinized at birth, although they have small external genitalia when evaluated at 7 wk of age (174). Mice with N-ethyl-N-nitrosurea-induced GnRH receptor mutagenesis are also reported to have micropenis and small testes in adulthood, indicating that although normal masculinization of the external genitalia occurred, due to adequate GnRH/LH-independent testosterone production during the masculinization programming window (Fig. 3) (9), the impairment of GnRH (and thus LH) secretion and subsequent reduction in testosterone secretion in late gestation and postnatal life reduced penile growth and development (178), as would be expected (Fig. 4) (131, 179).

## C. LH and LH receptor mutations

### 1. Common $\alpha$ -subunit (LH, FSH) inactivating mutations

There are currently no humans identified with mutations of the common  $\alpha$ -subunit gene. Because there has been no proven germ line mutation, it has been suggested that the mutation is possibly lethal in humans (180) because it would also affect production of hCG and TSH in addition to gonadotropins (180). Consequently, the human phenotype of a common  $\alpha$ -subunit gene mutation is still unknown. On the other hand, mice with targeted disruption of the common  $\alpha$ -subunit gene have a subsequent loss of LH, FSH, and TSH, which causes hypogonadism and hypothyroidism, and a comparable phenotype to mice with combined GnRH and TSH deficiency. These mice are viable, and masculinization is normal at birth (181), reinforcing the evidence that LH action is not required for the fetal period of masculinization in rodents (Fig. 3). However, because mice do not produce or rely on CG for maintenance of pregnancy, this may not be a suitable model to compare to the human situation.

### 2. LH $\beta$ -subunit inactivating mutations

There are currently four reports of five human males with LH $\beta$  gene mutations (182–185). All of these individuals had normal genitalia and descended testes at birth but then failed to undergo postnatal genital and pubertal development (182–185). Taken together, these five cases suggest that in the absence of pituitary LH, either hCG or paracrine factors are able to stimulate fetal Leydig cells to produce testosterone in the human male fetus (Fig. 3) so that normal intrauterine masculinization occurs; this agrees with other data discussed below. In a mouse model

with targeted inactivation of the LH $\beta$ -subunit gene, the males exhibit normal prenatal masculinization (186).

Therefore, several lines of evidence show unequivocally that, in the absence of LH, rodents masculinize normally, which shows that LH is not required for normal fetal testicular testosterone production during the period when masculinization is induced, now established to be during the masculinization programming window (Fig. 2). Consequently, fetal rodent testosterone production must be driven by unknown local (paracrine) factors because rodents do not produce CG. The evidence just described for one man lacking LH $\beta$  (and thus LH) suggests that masculinization-dependent testosterone production is also LH-independent in humans. However, in contrast to rodents, in the human this LH independence could be due either to the action of local paracrine factors (as in rodents) or to stimulation by hCG produced by the placenta. Evaluation of patients with inactivating mutations of the LH receptor points clearly to the latter as being of primary importance.

### 3. LH receptor-inactivating mutations

Inactivating mutations of the LH/CG receptor (LHCGR) in human males leads to an absence of, or incomplete, masculinization (pseudohermaphroditism) as well as cryptorchidism and Leydig cell hypoplasia (187). Despite displaying female external genitalia, these individuals still have epididymides and vasa deferentia (180, 188, 189), but they do not retain Müllerian duct structures (180). The human phenotype depends on the completeness of the receptor inactivation (187), and partial inactivation of the LHCGR results in micropenis, hypospadias, and cryptorchidism (180, 190), consistent with subnormal, but not absent, testosterone production during the masculinization programming window (Fig. 3) (9). The presence of epididymides and vasa deferentia implies that individuals with LH receptor inactivation must still be able to produce sufficient testicular testosterone to masculinize local Wolffian duct structures, and this has led to suggestions that the testosterone needed for Wolffian duct stabilization may be produced independently of LH/hCG action (189). Others have proposed that this may indicate that testosterone synthesis starts autonomously and then becomes dependent on placental hCG or that some components of steroidogenesis may be constitutively independent of LH/hCG stimulation (67, 191, 192). This scenario is comparable with the phenotype of male rats exposed to flutamide *in utero*. It has been shown that flutamide exposure prevents normal masculinization of the external genitalia but only has minor effects on the Wolffian duct, affecting differentiation but not stabilization (193). It has also been demonstrated that the critical window for Wolffian duct development is during the masculinization pro-

gramming window (194). These data suggest that low (subnormal) levels of testosterone produced during the masculinization programming window could result in the maintenance of Wolffian duct structures, although masculinization of the external genitalia was absent or incomplete. Although this may possibly be explained by the degree of LHCGR inactivation, it seems more likely that the very earliest stages of testosterone production by the fetal human testis may be driven partially or completely by hCG/LH receptor-independent local mechanisms, although it would appear that this is rapidly superseded by hCG-driven control (Figs. 2 and 3). The identity of the paracrine factor(s) that might drive fetal testis steroidogenesis in humans or rodents is unclear but merits further study because of its importance; potential candidates have been identified in rodent studies (Table 1).

In contrast to the human, genetically modified mice in which the LHCGR gene has been inactivated (LuRKO mice) are identical to wild-type mice at birth and display normal masculinization (195, 196). These data are wholly consistent with all of the other transgenic mouse models reviewed in this section and further emphasize that, in the rodent, signaling via the LHCGR is not required for masculinization of the reproductive tract and genitalia (195), whereas in the human a functional LHCGR is essential for normal masculinization (Fig. 3).

### 4. LH receptor-activating mutations

If LH/CG stimulation of steroidogenic cells is critical for the onset of androgen synthesis, it might be expected that LHCGR-activating mutations would initiate androgen production in females and result in masculinization of the female fetus. Human males with LHCGR-activating mutations have been identified and exhibit early-onset, gonadotropin-independent, precocious puberty (testotoxicosis) (197), yet human females with activating LHCGR mutations do not manifest an abnormal phenotype (198, 199). Why this is so is currently unexplained, but the most likely explanation is that a mature LHCGR protein is not expressed at this time in females, and probably not until a time during puberty based on the absence of females with precocious puberty resulting from activating mutations of the LHCGR.

### D. P450 oxidoreductase (POR) deficiencies (PORD)

The enzyme POR is required for the catalytic activity of all of the microsomal P450 enzymes because it acts as the final electron donor to these enzymes (200, 201). Inactivation of the *Por* gene in mice leads to severe developmental defects and embryonic death at e9.5 (202). Consequently, (partially) inactivating mutations of POR in the autosomal recessive human POR disorder (PORD) could

potentially affect the activities of all microsomal P450 enzymes involved in cholesterol biosynthesis, steroidogenesis, and xenobiotic metabolism (201). The modulatory effects of the various POR mutations appear to have different hierarchical impact on the activities of the P450 enzyme families. The C17–20 lyase activity of human CYP17 *in vitro* appears strikingly more affected by POR mutations than is CYP17-associated 17-hydroxylase activity, a probable reflection of CYP17-associated lyase's particular dependence on the abundance of both its redox partners, POR and cytochrome b<sub>5</sub> (203). Because the relative 17-hydroxylase/C17–20 lyase activity and character varies not only across species but also between organs in any given species, the relative sensitivity of C19-steroid biosynthesis to POR mutations may differ between both species and organs. The rat 17-hydroxylase/lyase catalyzes a more concerted two-stage reaction than that of the human or the bovine enzyme (204), whereas remarkable changes also occur in adrenal CYP17-associated activities between the human fetal, preadrenarchal, and adult adrenal stages of development (205). The production of C-19 steroids (androgens) in male and female PORD patients is severely reduced, presumably because the 17,20-lyase activity of the CYP17 enzyme is particularly sensitive to POR impairment (206). As a result, male patients with inactivating mutations of POR can be undermasculinized, although this does not happen as frequently as would be predicted, probably because the degree of impairment of another P450 enzyme, placental aromatase (CYP19), is also dependent on the nature of the particular POR mutation. Defective CYP19 activity (because of the absence of normal POR), may result in the accumulation of testosterone and androstenedione (possibly of fetal adrenal rather than of fetal testis origin), which then enters the fetal (and maternal) circulation and goes part way to compensating for suppressed testicular testosterone production (207–209). This would follow if a differential effect of POR mutations on adrenal *vs.* testis CYP17-activities occurs. Little is presently known concerning the effect of POR mutations on CYP17-dependent activities in specific human and rodent fetal issues including the fetal adrenal and testis.

Although some male PORD patients are undermasculinized, nearly all females with PORD develop virilized external genitalia, despite having low androgen production after birth (206). Although the accumulation of placental testosterone and androstenedione (including maternal sources) also enters the circulation of female fetuses, compromised aromatase activity is not sufficient to explain female virilization because: 1) in classic CYP19 deficiency only females with near-complete loss of placental CYP19 activity are virilized (210); and 2) PORD also

causes a reduction in the supply of DHEA, the precursor for both androstenedione and testosterone (209, 211).

A proposed explanation for this paradox is the production of androgens in PORD females via the “backdoor pathway” (206, 207). This appears to be the main pathway used by the tammar wallaby pouch young (212), neonatal mice (213), and neonatal rats (214) to produce dihydrotestosterone (DHT), but it bypasses the conventional intermediates androstenedione and testosterone (201). Under most circumstances, little 5 $\alpha$ -reductase is expressed in the testis, so the conversion of testosterone to DHT occurs in androgen target tissues from circulating testosterone (206). In rare situations, including in the tammar wallaby pouch young and neonatal rodents, 5 $\alpha$ -reductase is expressed in the testis, and as a consequence, 17 $\alpha$ -hydroxyprogesterone is converted via 5 $\alpha$ -reductase and reductive 3 $\alpha$ -HSD to 5 $\alpha$ -pregnane-3 $\alpha$ ,17 $\alpha$ -diol-20-one (PdIol). PdIol is then converted to androsterone by CYP17, then androstanediol by 17 $\beta$ -HSD3, and is finally converted into DHT by oxidative 3 $\alpha$ -HSD in target tissues (206). Although the specific pathways used in the backdoor pathway are slightly different in the wallaby pouch young and immature mouse testis, androstanediol is synthesized by two pathways in both cases (206).

In PORD, the particular impairment of the lyase aspect of the CYP17 enzyme results in an accumulation of 17 $\alpha$ -hydroxyprogesterone, which may drive the flux of 5 $\alpha$ -reduced 21-carbon steroids to androsterone via the backdoor pathway; this is supported by evidence showing that the 19-carbon steroids in PORD are derived primarily from 5 $\alpha$ -reduced 21-carbon steroids rather than the traditional  $\Delta^4$ -steroid pathway involving androstenedione and testosterone (206). Additionally, although CYP17 is required to convert 5 $\alpha$ -pregnane-3 $\alpha$ ,17 $\alpha$ -diol-20-one into androsterone, 5 $\alpha$ -pregnane-3 $\alpha$ ,17 $\alpha$ -diol-20-one has a much higher affinity for CYP17 than does 17 $\alpha$ -hydroxyprogesterone (215), making the backdoor pathway a far more feasible route of androgen production in PORD, and urinary steroid profile analyses in a number of individuals with PORD concluded that this pathway is indeed operating (201).

#### E. Masculinization disorders when fetal testis function is normal

Failure or incomplete masculinization at birth is not always indicative of impaired testosterone production by the fetal testis. It can occur due to deficiencies in androgen action downstream of the testis, for example because of mutations in the AR (1) or because of 5 $\alpha$ -reductase type 2 deficiency (pseudohermaphroditism) (216). The presenting genital phenotype of such individuals can be similar to those described above in which deficiency in testicular secretion of testosterone (for various reasons) is the root

cause. Therefore, although masculinization disorders are extremely informative of fetal testis function, correct interpretation requires assurance that deficiencies in androgen action are not the cause. Furthermore, human/rodent differences also need to be taken into consideration in such comparisons, especially those involving  $5\alpha$ -reductase type 2 deficiency because knockout of this gene in mice, with or without concomitant knockout of  $5\alpha$ -reductase type 1, does not affect masculinization (217). In contrast, blockade of  $5\alpha$ -reductase type 2 using the specific inhibitor finasteride in rats does impair masculinization (218). There are also numerous environmental chemicals that are effective AR antagonists at appropriately high levels of exposure in animal studies, and their resulting effects on masculinization can therefore also be misinterpreted as reflecting impaired testis steroidogenic function (219).

## VI. Susceptibility of Fetal Leydig Cell Steroidogenesis to Disruption/Inhibition by Therapeutic Compounds and Environmental Chemicals

There is currently considerable concern about the potential for some environmental chemicals (endocrine disruptors) to impact on human male reproductive health, and this is centered around inhibition of fetal androgen production or action (117). Most of this concern stems from studies in laboratory animals, and comparison of the susceptibility of fetal Leydig cell steroidogenesis to disruption by such compounds may help to assess risk to the fetus as well as identifying (common) mechanisms of action. One criticism of these studies is that adverse effects on the fetal testis, or on masculinization, have only usually been shown at levels of exposure to individual chemicals that are probably far in excess of human exposure levels (7). However, this criticism has been effectively undermined by demonstration that there are additive effects of mixtures of individual chemicals when they target a similar process (220). For compounds that affect fetal testis steroidogenesis, such as certain phthalates (see below), the presumption is that effects in rodents are likely to predict effects in humans because of the near-identity of the steroidogenic process, as detailed above. Nevertheless, this presupposes that there are identical pathways of effect in human and rodent fetal testes, and testing of this presumption was a primary motivation for this review.

Additionally, in the human there is the potential that fetal exposure to certain therapeutic drugs, administered to the mother, may inhibit fetal Leydig cell steroidogenesis and thus potentially affect masculinization in the male. Comparison of such findings with those from experimental studies in rodents with the same compounds affords a

further means of comparing human and rodent testis susceptibility. Finally, altered exposure to endogenous hormones (other than androgens), due to altered fetal growth (221), maternal disease (222), stress (223), or multiple pregnancy (224) could also potentially affect the fetal testis directly or indirectly in humans, and such effects may mimic those seen after therapeutic exposure to the same hormone (e.g., estrogens, glucocorticoids). Because there is also abundant evidence from rodent studies for effects of some of these hormones, this provides a further point of comparison.

### A. Estrogens

It is generally perceived that estrogens are inhibitory in the male or at least that they antagonize androgen action. The mechanism for such antagonism is not clear, but at its simplest could involve estrogen inhibition of Leydig cell testosterone secretion, for which there is some evidence (see below). Other studies suggest that it is the balance between androgen and estrogen action, rather than absolute levels of either hormone, that is critical in determining effects (225). The mechanisms via which the androgen-estrogen balance could induce effects is unclear, but it could involve interactions of androgen and estrogen receptors with Src (226–228) and bypassing of transcriptional regulation. Nothing is known about whether such mechanisms might operate in the fetus.

Pregnancy is a time of high estrogen production, especially in the human (229), which has raised doubts as to how additional exposure of the fetus to exogenous estrogens could add effectively to the already high exposure to placental estrogens. This raises complex issues regarding the bioavailability of pregnancy estrogens, which are mainly bound to SHBG in the human (but not in rodents), whereas for example, synthetic estrogens such as diethylstilbestrol (DES) and ethinyl estradiol do not bind to SHBG and will therefore be more freely bioavailable (12). Additionally, even in humans, fetal exposure to pregnancy estrogens (as indicated by maternal estriol levels) may be much lower early in pregnancy during the period of the masculinization programming window (229, 230), so that exposure to exogenous estrogens at this time could potentially increase fetal estrogen exposure. This could be detrimental if this exposure resulted in antagonism of androgen action. The mechanism of action of estrogens in this situation may be complex and involve more than inhibition of steroidogenesis.

The evidence for adverse effects of estrogens on steroidogenesis in the fetal human testis and/or it having downstream consequences is rather weak, and the limited available evidence indicates no estrogen inhibition of steroidogenesis by the fetal human testis (231). It is commonly reported that fetal DES exposure in humans results

in increased occurrence of hypospadias in sons (232, 233), as is clearly the case in rodents (see below). However, this is not the case (12), and the cited studies in fact relate to the mother's exposure as a fetus to DES, which then increases the incidence of hypospadias in her sons, probably via effects related to DES-induced uterine maldevelopment in the mother (232, 233). However, hypospadias or other genital abnormalities have been reported in boys whose mothers were exposed to ethinyl estradiol or progestogens in pregnancy (234, 235), especially when this exposure occurred early in gestation (before 11 wk gestation) (236, 237). Recent epidemiological evidence shows approximately 2-fold increased risk of hypospadias in sons associated with maternal progestin exposure during the first trimester (238). Whether such an effect is due to alteration in steroidogenesis or to direct effects on the penis is presently unknown. Direct effects on the developing penis may provide a more logical explanation for both progestins and estrogens (see below). Microphallus and reduced testis size are associated with fetal estrogen exposure (12, 239), both of which might reflect reduced testosterone levels or androgen action in the second and third trimesters of pregnancy (Fig. 4).

Estrogen (estriol) levels in women having twins have been shown to be 1.8 to three times higher than in singleton pregnancies (224), and geometric mean estradiol levels have been reported to be 59% higher in women carrying twins (240). It has also been shown that there is a higher frequency of hypospadias in boys who have a twin (221). As fetal growth is often compromised in twins and this is a known risk factor for hypospadias (221), this may provide a more logical explanation for this association. In this regard, meta-analyses of epidemiological studies that investigated the relationship between *in utero* exposure to estrogens, including endogenous estrogens, the contraceptive pill, or environmental estrogens, have shown no association with increased risk of reproductive tract disorders, including hypospadias in humans (241–243). Therefore, in comparison with rodent studies (see below), the lack of evidence (direct or indirect) for estrogen inhibition of fetal testicular steroidogenesis in the human is reasonably consistent and fits with the reported absence of estrogen receptor (ER)- $\alpha$  in fetal human Leydig cells (indeed, its complete absence from the fetal testis) (244, 245) because all such effects in rodents appear to be mediated via ER $\alpha$  (see below). It still remains possible that effects could occur via ER $\beta$ , which is expressed in fetal human Leydig cells (245).

Experimental studies in both rats and mice demonstrate that estrogens can directly inhibit testicular steroidogenesis in the fetus. For example, administration of DES or estradiol to pregnant dams (e10.5–e17.5 in mice; e13.5–

e17.5 in rats) results in major reductions in fetal ITT levels at e18.5 in mice (246) and at e19.5 in rats (247). Although it is uncertain from these studies whether suppression of testosterone levels would have occurred during the masculinization programming window (Fig. 2), studies using explant cultures of e14.5 fetal rat testes suggest that this is likely (248). Consistent with this, studies in male offspring of pregnant mice exposed *in utero* (e12–e17) to DES or a range of doses of ethinyl estradiol reported a 40–57% incidence of hypospadias (249), although these authors attributed this to direct effects of estrogen on the developing penis because other lines of evidence point to such a possibility (132, 250). Nevertheless, inhibition of fetal Leydig cell steroidogenesis by high estrogen exposure is proven unequivocally for rodents (251) and is associated with reduced expression of SF1, StAR, and CYP17 (246, 252, 253). Estrogen exposure in these situations *in vivo* in rodents does not appear to involve any change in LH secretion (247, 254). Moreover, it is clear that these effects occur via ER $\alpha$  because DES does not inhibit testosterone production *in vitro* by fetal testes from ER $\alpha$  knockout mice, nor does any suppression of CYP17 occur as in wild-type mice (252). These findings are also consistent with the strong expression of ER $\alpha$  in fetal Leydig cells in rodents (255, 256). The importance of timing of estrogen exposure was shown by a study in which rats were exposed to DES from e17 to e19 (257), which is after the masculinization programming window (Fig. 2). Although these animals had reduced Sertoli cell number and testis weight, as would be predicted because androgen-driven Sertoli cell proliferation occurs mainly late in gestation (8), AGD was unaffected, and there was no mention of any reproductive tract anomalies (257).

There is also another potential mechanism via which estrogens may interfere with androgen-dependent masculinization, based on studies in neonatal rats exposed to DES. These studies have shown that as well as suppressing testosterone production by the testis, a more profound effect involves almost complete loss of AR protein expression, and this is associated with impaired development of the reproductive tract (225, 258). It is unknown whether this mechanism can also be triggered by estrogen exposure during pregnancy, but if so, it could provide a mechanism via which estrogens could affect development of AR-dependent organs such as the penis, irrespective of any effect on testosterone production by the fetal testis, and this could apply to the human as well as to the rat.

The inhibitory effects of high fetal estrogen exposure on steroidogenesis in rodents may reflect a physiological role because ER $\alpha$  knockout mice show increased steroidogenic activity per Leydig cell and increased mRNA levels for StAR, CYP17, and CYP11 (254). Studies *in vitro* with

fetal rat testis explants cultured with ER antagonists point to a similar possibility (251). However, low-dose (oral) exposure of pregnant mice to  $17\beta$ -estradiol levels more compatible with pregnancy levels failed to induce hypospadias in the male offspring (259).

In conclusion, high fetal exposure to estrogens can cause male reproductive tract anomalies in rodents, and it seems likely that this is due (at least in part) to the perturbation of androgen production by the fetal testis. The majority of evidence suggests that this effect does not happen in the human fetal testis, pointing to a fundamental difference between rodents and humans with regard to regulation/disruption of fetal testicular steroidogenesis.

## B. Glucocorticoids

In the human, the main glucocorticoid is cortisol, and in the rat it is corticosterone. Glucocorticoids have been selected for discussion in this review because it is well recognized that elevated levels of glucocorticoids, in response to psychological or physical stress or disease, can result in suppression of testosterone levels in adult males (260), and there is tenuous evidence for a link between maternal therapeutic use of glucocorticoids and occurrence of hypospadias in the male offspring (261). Glucocorticoids are also used widely in the treatment of a range of disorders, including during pregnancy. The majority of data describing the effects of elevated levels of glucocorticoids on testosterone production and possible mechanisms come from studies in adults, and there are only limited data for fetal effects. Although the human fetal adrenal is not as active in glucocorticoid production as is the adult adrenal, it does produce cortisol at the start of the masculinization programming window, before becoming a principal producer of  $\Delta^5$ - $3\beta$ -hydroxysteroids (262). Cortisol production by the adrenal at this age may be important in the human female because it is thought to lead to suppression of adrenal androgen production via negative feedback on ACTH, which minimizes the potential for masculinization via adrenal androgen production (262).

The human fetus may be exposed to elevated levels of glucocorticoids via several possible routes. It may be exposed to elevated levels of maternal cortisol, resulting from maternal stress (263). Additionally, synthetic glucocorticoids such as dexamethasone are often administered to pregnant mothers for various reasons, but especially if they are at risk of preterm labor, to prevent respiratory distress syndrome (264). After fetal exposure to dexamethasone for this reason, no differences in cord blood or postnatal infant testosterone levels were reported between dexamethasone-exposed and control fetuses (264). However, in such cases the fetal glucocorticoid exposure is usually much later in gestation than the pre-

sumptive masculinization programming window and is at a time when the fetal testis is not especially steroidogenically active (Fig. 2). Two studies have investigated possible correlations between fetal levels of cortisol and testosterone, one in fetal plasma (265) and one in AF (266), and both reported a positive, as opposed to a negative, correlation between levels of the two hormones. The results therefore contrast with the inverse relationship seen between cortisol and testosterone levels in adult men (see below) (267). Although it can be difficult to interpret associations and determine what is cause and effect, these results may suggest that the mechanism of interrelated control of the hypothalamic-pituitary-adrenal axis and testosterone production is different in the human fetus compared with the adult (265). What is unclear is whether the potential positive effect of elevated glucocorticoids on testosterone concentrations in the human fetus is mediated by LH or by intratesticular effects; studies from adults do not indicate important changes to LH secretion in situations where glucocorticoids reduce testosterone levels (267). Studies using fetal adrenal tissue *in vitro* indicate that dexamethasone does not stimulate androgen secretion, at least during the first trimester (262).

There are numerous studies in adult men on the effects of increased exposure to cortisol or dexamethasone, all of which show reduced testosterone levels with no preceding change in LH levels. A study in which 60 mg cortisol was administered at 1000 h and then 30 mg every 3 h, or 6 mg dexamethasone was administered at 1000 h and 3 mg every 6 h over a 24-h period, showed that testosterone was not suppressed until night time and that a rise in LH and FSH did not occur until after testosterone levels had fallen (268). A study in which 8 mg dexamethasone per day was administered for 3 d reported a significant reduction in testosterone and no change in LH levels (269). Chronic glucocorticoid therapy in older men (average age 60 yr) with chronic pulmonary disease suppressed serum testosterone levels with no change in basal gonadotropin levels (270). Finally, elevated levels of circulating cortisol as a result of insulin-induced hypoglycemia or administration of cortisol resulted in a rapid reduction in serum testosterone levels with no change in LH levels (267). This is also the case in men with Cushing's syndrome, who have high levels of cortisol and low levels of testosterone with no alteration in LH levels (271–273). All of these studies point to direct inhibition of Leydig cell steroidogenesis by glucocorticoids in the adult human testis.

Studies investigating fetal rat exposure to the synthetic glucocorticoid dexamethasone all demonstrate a concurrent reduction in testosterone. When pregnant rats were treated with 100  $\mu$ g/kg dexamethasone during the last week of gestation, the male offspring exhibited signifi-

cantly reduced levels of ITT and modest, but significant, reductions in AGD on e21.5 (274) or on the day of birth (275), indicative of slightly reduced testosterone levels during the masculinization programming window (Fig. 2); these rats showed no change in plasma LH concentrations (275). In contrast, a study exposing pregnant rats to dexamethasone via their drinking water (10  $\mu\text{g}/\text{ml}$ , therefore exposed to no more than 200  $\mu\text{g}/\text{d}$ ) from e15–e21 demonstrated that plasma testosterone levels were significantly reduced on e19 and e20, but not e18 (276). Acute treatment with dexamethasone on gestational d 18 resulted in fetuses (killed on e19) with significantly reduced plasma testosterone and LH (276). A single injection of dexamethasone (10  $\mu\text{g}$ ) after cesarean section on e21 suppressed plasma LH and the testosterone surge normally seen after birth when examined 30, 60, and 90 min after administration (276). Fetal rats exposed to maternal stress from e14 to e21 were investigated on e17, e18, e19, or e21 to determine levels of corticosterone, progesterone, and testosterone. Levels of corticosterone were at their highest between e17 and e20. Testosterone levels were higher in the stressed male fetal rats at e17, but then decreased so that the normal testosterone surge that occurred in the control males between e17 and e19 was absent. Although LH levels were not measured in this study, the authors suggested that the suppression of LH in the fetus by stress could explain the loss of an LH-dependent testosterone surge (105).

The foregoing results strongly indicate that dexamethasone alters direct or GnRH-mediated LH secretion to suppress testosterone production in fetal rats (276), which contrasts in several ways with both the fetal and adult data for humans. It is also possible that glucocorticoid exposure of the fetal rodent reduces Leydig cell steroidogenesis by inhibiting ACTH secretion (via negative feedback) because the fetal (but not adult) Leydig cells in the mouse contain active ACTH receptors and ACTH stimulates their testosterone secretion (277). However, it seems unlikely that ACTH is an important regulator of fetal Leydig cell steroidogenesis because mice lacking ACTH have normal fetal testosterone levels (277). Because the main mechanism for glucocorticoid suppression of fetal testosterone in the rat appears to involve suppression of LH, this means that glucocorticoids are unlikely to have major effects within the masculinization programming window (Figs. 2 and 3), and this fits with the modest reported reduction in AGD in dexamethasone-exposed fetal male rats (274, 275).

Several studies have investigated the effects of glucocorticoids on testosterone production in postnatal and adult rodents or in cell lines/cultures, and the majority of these data show, as in adult humans, that elevated glucocorti-

coid exposure inhibits testosterone production via a direct effect on Leydig cell steroidogenesis. For example, studies in immature (278, 279) or adult (280) rats showed that dexamethasone or corticosterone reduced testicular testosterone production, and similar effects can be induced in either adult mice (281) or rats (282) via immobilization stress, which increases endogenous corticosterone levels. The latter study in rats showed that the likely mechanism for this effect is reduced CYP17 enzyme activity (282), and this has been confirmed using primary cultures of rat Leydig cells isolated from hypophysectomized rats (283). Other studies using adult rat Leydig cell cultures have shown inhibition of  $3\beta$ -HSD activity (284) or  $3\beta$ -HSD and  $17\beta$ -HSD mRNA expression and activity (285), and data in mice support this also (70). Additionally, two studies using MA-10 mouse tumor Leydig cells have shown that StAR expression is suppressed by glucocorticoids (286, 287), in a glucocorticoid receptor dependent manner (286). The adult rat Leydig cell is known to contain high levels of  $11\beta$ -HSD type 1 (288), whereas it is widely accepted that it is  $11\beta$ -HSD type 2 that inactivates glucocorticoids (289). Therefore, although it has been postulated that  $11\beta$ -HSD expression may protect Leydig cell steroidogenesis from inhibition by glucocorticoids (290), this does not fit straightforwardly with the low expression of  $11\beta$ -HSD type 2. Although fetal rat Leydig cells lack type 2  $11\beta$ -HSD immunoreactivity, it is thought that fetal androgen production is probably protected from glucocorticoid-mediated inhibition by the high levels of  $11\beta$ -HSD type 2 in the placenta (289). Presumably, dexamethasone reduces fetal testosterone levels not only because it is a poor substrate for rat  $11\beta$ -HSD type 2, and consequently is not inactivated during passage across the placenta (291), but also because any 11-dehydrodexamethasone formed remains an active glucocorticoid.

Although the data in the fetal human is limited in comparison to rodents and is mainly indirect, it is apparent that elevated glucocorticoid levels may have opposing effects on human and rat fetal Leydig cells. Human fetal exposure to increased glucocorticoid concentrations appears to have no effect on testosterone production or may even increase it, whereas in fetal rats it suppresses testosterone production, perhaps via effects on LH; such a mechanism would only be able to operate later in gestation, after the masculinization programming window, because LH is the driver of steroidogenesis before this in the rat (Fig. 2).

### C. Glitazones

The glitazones (also known as the thiazolidinediones) include rosiglitazone, pioglitazone, and troglitazone (the latter was withdrawn from the market in 2000 due to high risk of hepatotoxicity) (292). Through the activation of

peroxisome proliferator-activated receptors (PPARs), specifically PPAR $\gamma$  (293), the glitazones act to reduce insulin resistance and as such are used to treat type 2 diabetes (293). Glitazones are of interest in the context of this review because they can inhibit the steroidogenic enzymes CYP17 and 3 $\beta$ -HSD and reduce testosterone production in certain circumstances (294–296). An additional feature of interest is that interaction of glitazones with PPARs (297) is a feature that they share with phthalates (discussed below) (298), and some phthalates also interfere with testicular steroidogenesis. It has been shown that rosiglitazone transfers across the human placenta in the first trimester (299). Glitazones are also used to treat insulin resistance in women with polycystic ovarian syndrome (300), and in addition they reduce hyperandrogenemia (301–303). The potential mechanisms via which the glitazones exert their effects are most clearly established for the adult testis, so these are also considered as they may apply to the fetus.

A number of studies have reported human fetal exposure to rosiglitazone during pregnancy. The most recent study examined eight women with polycystic ovarian syndrome who used rosiglitazone before and during the first 12 wk gestation. All eight women gave birth to healthy babies at term, none of whom had congenital abnormalities (304). There have been two other cases of human fetal exposure to rosiglitazone during the first trimester, both taking rosiglitazone to control type 2 diabetes. Both women became pregnant and continued with rosiglitazone unaware of their pregnancy until 5 (305) or 7 (306) wk gestation. Both individuals discontinued the use of rosiglitazone upon discovering their pregnancies, and both gave birth to normal, healthy babies, one of whom was a male (305). Another case has been reported in which the individual knowingly took rosiglitazone during the second trimester of pregnancy. This woman had a history of type 2 diabetes that was controlled by diet and exercise until the 13th week of gestation, when she began treatment with rosiglitazone. This continued until the 17th week of gestation. The woman gave birth to a healthy male, with no major or minor malformations (307).

The aforementioned evidence suggests (indirectly) that human fetal steroidogenesis is not disrupted by exposure to rosiglitazone administered at the therapeutic dose of 4 mg/d (on average) because no reproductive abnormalities associated with suppressed androgen production were reported. However, this is based on small numbers of subjects (and male offspring), and not all male offspring were exposed during the relevant stage of gestation in which adverse (indirect) effects on testicular steroidogenesis might become evident. Evidence from studies in adult men or using *in vitro*

systems suggests that glitazones can inhibit testicular steroidogenesis under certain circumstances.

Two studies have assessed the effect of rosiglitazone on testosterone levels in adult men, but the results are conflicting. Thus, both plasma testosterone and DHT levels were significantly reduced in 10 healthy men administered 8 mg/d (clinically relevant dose) of rosiglitazone for 7 d (296). In contrast, chronic treatment of 20 hypogonadal men with type 2 diabetes for 6 months with the same dose of rosiglitazone increased levels of total testosterone, free testosterone, and bioavailable testosterone, as well as increasing levels of SHBG (308). These apparently contradictory results are probably explained by the other effects of rosiglitazone on adiposity, insulin, and leptin levels after chronic treatment in the diabetic men. It is generally considered that the low levels of total testosterone observed in diabetic men (309) are a consequence of low levels of SHBG, which result from negative regulation by insulin (310). As well as increasing levels of SHBG in diabetic men, presumably by increasing insulin sensitivity, rosiglitazone may also increase levels of total testosterone by reducing visceral fat and thus lowering breakdown of testosterone by aromatase in adipose tissue (308). Obese men frequently exhibit higher levels of circulating leptin (311), and evidence from *in vitro* studies with cultured adult rat testicular tissue indicate that leptin inhibits basal and hCG-stimulated testosterone production through the inhibition of StAR and CYP11A (312).

In humanized yeast cells that express steroidogenic enzymes in a microsomal environment, it was shown that troglitazone, rosiglitazone, and pioglitazone all competitively inhibited CYP17 and noncompetitively inhibited 3 $\beta$ -HSD (294), and similar results were obtained with pioglitazone and rosiglitazone using human adrenal NCI-H295R cells (295). It was thought that the glitazones may inhibit testosterone production via PPAR $\gamma$ , as they exert their effect on insulin sensitivity via this receptor, because PPAR $\gamma$  is expressed in the human testis (313) but also because PPAR $\gamma$  has been shown to be activated by phthalates, which also act to reduce testosterone production (314). However, inhibition of PPAR $\gamma$  using small interfering RNA did not prevent the inhibition of CYP17 and 3 $\beta$ -HSD by pioglitazone (295), indicating lack of involvement of PPAR $\gamma$  in steroidogenic inhibition by glitazones. This is also supported by evidence that the ability of each of the glitazones to inhibit CYP17 and 3 $\beta$ -HSD does not correlate with their ability to increase insulin sensitivity (which is mediated via PPAR $\gamma$ ), implying that they reduce testosterone and increase insulin sensitivity via two separate mechanisms (294). Evidence indicates that the MAPK kinase/ERK signaling pathways may be involved in the suppression of androgen biosynthesis by pioglitazone (295).

Exposure of pregnant rats to rosiglitazone (up to 600 mg/kg/d) from e7–e21 had no effect on testicular testosterone production or testosterone levels in male fetuses or on AGD, although plasma leptin and insulin levels were both reduced (315). Therefore, this finding is consistent with the human studies discussed above, but contrasts with the evidence pointing to inhibition of steroidogenesis by glitazones in adulthood in humans via inhibition of the steroidogenic enzymes CYP17 and  $3\beta$ -HSD. There are, however, confounding factors involved in many adults using glitazones for the treatment of insulin resistance (obesity, increased leptin, and increased aromatase), and these may also affect steroidogenesis. The current data regarding rodent exposure to glitazones is limited and does not provide conclusive evidence that these compounds affect steroidogenesis.

#### D. GnRH/GnRH analogs

There has been considerable interest in the potential direct effects of GnRH and its agonists on Leydig cell steroidogenesis, largely because of the therapeutic use of these compounds for suppression of testicular steroidogenesis in adult men with prostate cancer (316). The latter suppression is thought to result from down-regulation of pituitary gonadotropin secretion due to overstimulation by GnRH agonists, but the possibility of direct Leydig cell effects emerged because studies in rats (see below) had clearly shown both stimulatory and inhibitory effects of GnRH agonists on fetal and adult Leydig cell function. There have been no studies of expression of GnRH receptors or GnRH agonist action on human fetal Leydig cells/testes, and initial studies in adult testes pointed to absence of GnRH receptors (317). However, more recent studies indicate that at least the mRNA for GnRH receptors is expressed in the adult human testis (318, 319). Despite this, the majority of the available data, based on various *in vivo* (320) and *in vitro* (321) approaches, suggest that there are no significant effects, either stimulatory or inhibitory, of GnRH agonists on Leydig cell steroidogenesis in adult humans (316). Similar conclusions were reached from studies in nonhuman primates (322, 323). Those studies that have suggested the possibility of direct effects of GnRH agonists on human testicular steroidogenesis have provided only tentative evidence and only for positive, not negative, effects (316, 324).

In contrast to the human, it is clear that, in the rat, fetal (325), neonatal (326), and adult (326, 327) Leydig cells all express GnRH receptors and that GnRH agonists can modulate steroidogenesis via interaction with these receptors in either stimulatory or inhibitory directions depending on age, the duration of exposure to GnRH agonist, and whether or not there is concomitant LH/hCG exposure. Of particular interest is that the stimulatory effect of

GnRH agonists on Leydig cell testosterone secretion does not emerge until near the end of gestation (328) and becomes much more obvious for adult Leydig cells (329). Instead, the initial effect (e16.5–e18.5) of GnRH agonists on fetal testicular steroidogenesis in rats is uniformly negative (86, 328). Although potential stimulatory effects on basal testosterone secretion then emerge by e20.5 (328), in the presence of LH stimulation (*i.e.*, the normal physiological situation at this age; Fig. 2), the effect of GnRH agonist continues to be inhibitory in fetal (328, 330, 331) life through to adulthood (332) and results primarily from inhibition of CYP17 (330, 332). Although most of these data were obtained from studies *in vitro*, studies *in vivo* in hypophysectomized fetal (333), immature (334), and adult (334, 335) rats show similar effects to those *in vitro*. In contrast to these findings in rats, purified fetal (336) and adult (329) mouse Leydig cells are unaffected by GnRH agonists *in vitro*, including absence of attenuation of LH/hCG-stimulated testosterone secretion, a finding consistent with the reported absence of GnRH receptors on Leydig cells in this species (335). However, *in vivo* studies in adult hypophysectomized mice are conflicting with one study showing absence of effect of GnRH agonist on testosterone levels (335) and one showing a negative effect (337) after chronic exposure; it is difficult to reconcile the latter finding with the aforementioned *in vitro* studies, and it is possible that the effects observed were due to incompleteness of the hypophysectomy. Otherwise, it seems likely that mouse Leydig cells, including fetal Leydig cells, are resistant to inhibitory effects of GnRH agonists, in marked contrast to rats, a contrast that echoes that noted later for the effect of certain phthalates on fetal Leydig cell steroidogenesis.

#### E. Ketoconazole

Ketoconazole is an orally active broad-spectrum antifungal agent used in the treatment of skin and fungal infections. Ketoconazole inhibits the cytochrome P450-dependent 14-demethylase, which catalyzes the conversion of lanosterol to ergosterol in yeast and fungi (338). In addition to its antifungal activity, ketoconazole also inhibits several mammalian cytochrome P450-dependent enzymes, interfering with steroidogenesis in the testes, adrenals, and placenta (339–341). Because fungal infections are not uncommon in pregnant women (some infections such as candida vaginitis are more prevalent in pregnant women) (342), it is important to consider the risk of inhibiting steroidogenesis in the pregnant woman and fetus.

In mammalian systems, the P450 enzyme particularly sensitive to ketoconazole is CYP17. This enzyme catalyzes two reactions in testicular steroidogenesis,  $17\alpha$ -hydroxylation and the  $17,20$ -lyase reaction (Fig. 1) (343, 344).

Both of these reactions are key steps in the  $\Delta^4$  and  $\Delta^5$  pathways (345), and it has been reported that the 17,20-lyase reaction is preferentially blocked by ketoconazole (346). Investigations into the effects of ketoconazole on fetal testicular testosterone biosynthesis have been undertaken in both humans and rats, and the difference in response highlights an intriguing difference in the susceptibility to inhibition between these two species.

Ketoconazole has been used in the treatment of Cushing's syndrome, an endocrine disorder caused by elevated blood levels of cortisol. Cushing's syndrome can have a variety of causes, including pituitary adenoma (known as Cushing's disease) and adrenal hyperplasia or neoplasia. Ketoconazole predominantly inhibits the 17,20-lyase reaction and inhibits 17 $\alpha$ -hydroxylase and 11 $\beta$ -hydroxylase to a lesser extent, so although ketoconazole mainly blocks androgen synthesis, it also inhibits cortisol production (346). There have been at least two reports of ketoconazole being administered to pregnant women with Cushing's syndrome (347, 348), situations that cause high risk for both the mother and fetus. In the first case, ketoconazole was administered from the 32nd to the 35th week of gestation, and the infant was born by elective cesarean section at 37 wk. The infant was female and was normally developed at birth (347). This is not surprising because ketoconazole was administered during the third trimester, after organogenesis and, had the infant been male, after the predicted masculinization programming window (9). In the second case, however, ketoconazole was administered throughout pregnancy, apart from between wk 3 and 7, and the male infant was born normally, with no congenital abnormalities and with normal masculinization (348). Because the fetus was exposed to ketoconazole during the presumptive masculinization programming window (Fig. 2), this implies that perhaps the dose of ketoconazole used (600–1000 mg/d) was not high enough to inhibit testosterone production sufficient to perturb masculinization. There has also been a population-based study of fetal exposure to ketoconazole during the second and third trimesters (349). It was concluded that the data did not demonstrate a higher rate of congenital abnormalities after *in utero* exposure to ketoconazole (349), although in this instance exposure was later in gestation than the presumptive masculinization programming window.

In contrast to the *in vivo* studies above, *in vitro* studies involving exposure of human (14–20 wk gestation) or rat (e19.5) fetal testis explants to 100  $\mu$ M ketoconazole demonstrated that, whereas human testicular testosterone production was significantly reduced, ketoconazole appeared to have no or highly variable effects on the fetal rat testis (350). Another *in vitro* study also demonstrated that

human fetal testes (7–12 wk gestation) exposed to 4  $\mu$ M ketoconazole for 4 d caused significantly reduced testicular testosterone production from d 2 onward (99). The latter finding suggests that sufficient exposure of the human fetus to ketoconazole during the masculinization programming window would be likely to impair steroidogenesis and potentially affect masculinization. The absence of any such effects in human males exposed *in utero* to ketoconazole is presumably because in such cases exposure did not coincide with the presumptive masculinization programming window (Fig. 2) or that exposure was too low to cause significant steroidogenic effects.

Other studies have administered ketoconazole to pregnant rats; however, the reported outcomes are contradictory. Two separate studies exposed pregnant rats to up to 50 mg/kg/d ketoconazole, one study from e14 to lactational d 3 (351), and the other from e7 to e21 (352), and both reported a high rate of litter loss. However, only one of the studies reported a significant reduction in testicular testosterone production and an effect on masculinization, namely a reduction in male AGD (352). It is possible that the difference in response to ketoconazole in these two studies reflects the use of different rat strains (Wistar *vs.* Sprague Dawley). It has been reported that ketoconazole crosses the rat placental barrier and that elimination is very slow from fetal membranes ([www.apotex.com/ca/en/products/downloads/di/0105\\_PIL.pdf](http://www.apotex.com/ca/en/products/downloads/di/0105_PIL.pdf)). However, it is equally likely that the particularly high rates of fetal death and growth seen in these rat studies have confounded the results. Either way, the available evidence indicates that human fetal testicular steroidogenesis is more susceptible to perturbation by ketoconazole than that of the fetal rat. Why this is the case remains to be answered, but a logical explanation could be that ketoconazole has a preference for inhibiting the human CYP17 activities involved in the  $\Delta^5$  pathway, which is the preferred steroidogenic pathway in the human fetal testis but not in the rat (Fig. 1), making human testicular steroidogenesis more vulnerable to inhibition by ketoconazole.

As just noted for the fetus, it is also apparent that adult human testicular steroidogenesis is more sensitive than rodent steroidogenesis to inhibition by ketoconazole. A study comparing the sensitivity of adult human, rat (Wistar), and dog testicular cells to ketoconazole reported that human cells were more sensitive to ketoconazole than rat and dog cells (343). This was confirmed by *in vivo* studies that showed that the dose of ketoconazole required to reduce plasma testosterone levels in humans was only 5 mg/kg (339), compared with 10–15 mg/kg in the dog (353, 354) and 24 mg/kg in the rat (355). It has also been stated that the affinity of ketoconazole for testicular P450 enzymes is higher in humans than in rats (356). As for fetal

steroidogenesis, it seems plausible that the species differences in susceptibility to inhibition by ketoconazole in the adult testis reflect the differences in preferred pathways via which testosterone is produced in the human ( $\Delta^4$  pathway) *vs.* the rat ( $\Delta^5$  pathway) (46), with the former being more susceptible to inhibition (Fig. 1).

#### F. Prochloraz

Prochloraz, like ketoconazole, is an imidazole fungicide. Prochloraz is used for crop protection because it inhibits CYP51 and thus weakens the fungal cell membrane (357, 358). Consequently, prochloraz was chosen for consideration in this review due to the high probability that it will work through similar mechanisms to ketoconazole, plus existing evidence that prochloraz can affect steroidogenesis in the rat and that human exposure is highly likely because it is registered for use in Europe and Australasia ([http://pesticideinfo.org/Detail\\_Chemical.jsp?Rec\\_Id=PC36352](http://pesticideinfo.org/Detail_Chemical.jsp?Rec_Id=PC36352)).

There are no available data for human exposure to prochloraz during pregnancy, but two *in vitro* studies have exposed H295R cells (human adrenocortical carcinoma cells) to prochloraz (359, 360). The results from both of these studies match the results after exposure of H295R cells to ketoconazole (see Section VI. E), namely progesterone levels were significantly increased, and testosterone levels were significantly reduced (359, 360). Evidence from fetal studies with ketoconazole and prochloraz in rats (see below) suggests that this occurs via inhibition of CYP17 activity.

There have been several studies on the effects of prochloraz on fetal rodent steroidogenesis. Pregnant Wistar rats exposed to 30, 50, or 150 mg/kg/d prochloraz from e7–e21 all exhibited a significant reduction in plasma and testicular testosterone production and an increase in progesterone at e21 (360, 361). Prenatal exposure of Sprague Dawley rats to 62.5, 125, or 250 mg/kg/d prochloraz from e14–e18 also resulted in a significant reduction in *ex vivo* testosterone production (362–364) and increased progesterone (362, 363). Exposed male pups also presented with reduced AGD, nipple retention, and severe hypospadias (363), resulting not only from prochloraz-induced suppression of androgen production, but because prochloraz is also an AR antagonist and competes with testosterone and DHT for binding to the AR (360, 363, 365).

The reduction of testosterone and increase in progesterone indicate that prochloraz impairs steroidogenesis by inhibiting CYP17 conversion of progesterone to testosterone (362). However, analysis of gene expression after *in utero* exposure to prochloraz has suggested that there are no effects on SRB1, StAR, CYP11a, or CYP17 expression in testicular tissue (360, 362). However, microsomal CYP17 hydroxylase activity was significantly reduced, indicating that although prochloraz does not down-regulate

expression of any of the genes involved in steroidogenesis, it does directly inhibit CYP17 enzyme activity (362). The increase in  $17\alpha$ -hydroxyprogesterone indicates that in addition to inhibition of CYP17 hydroxylase activity, CYP17 lyase activity is also inhibited by prochloraz, although at high doses (125 mg/kg/d) evidence suggests that the inhibition of hydroxylase activity is more pronounced than is inhibition of lyase activity (366); this might indicate that the human will be less susceptible than the rat to inhibition of steroidogenesis (Fig. 1). The rodent data on postnatal prochloraz exposure points in a similar direction. A study exposing rats from postnatal d 23–42 or 23–51 showed that both serum and *ex vivo* testicular testosterone levels were significantly reduced and that serum levels of progesterone and  $17\alpha$ -hydroxyprogesterone were increased (366), consistent with inhibition of CYP17 activity. Prochloraz reduces testosterone production at a lower dose in the postnatal rat (15.6 mg/kg/d) (366) than in the fetal rat (31.3 mg/kg/d) (362). It remains a matter for speculation as to whether prochloraz is capable of inhibiting testicular steroidogenesis in the human fetus, especially because it is evident that the CYP17 enzyme in humans and rodents may exhibit somewhat different catalytic preferences, as described earlier.

On the whole, the data indicate that prochloraz can suppress testosterone production in the postnatal human and in the fetal and postnatal rat by inhibiting CYP17 enzyme activity. The rodent data suggest that adult steroidogenesis is more susceptible to prochloraz than is fetal steroidogenesis.

#### G. Statins

Statins are used not only for the treatment of hypercholesterolemia (367), but also for their ability to decrease cardiovascular risk (368). They reduce plasma cholesterol levels by interfering with cholesterol synthesis, inhibiting the HMG-CoA reductase enzyme that catalyzes the rate-limiting step in the biosynthesis of cholesterol, the conversion of HMG-CoA to mevalonate (369). They also reduce circulating LDL cholesterol by increasing the expression of LDL receptors in hepatocytes (370). Because cholesterol is the precursor of all steroid hormones, it is recognized that HMG-CoA reductase inhibitors (statins), which act to reduce intracellular free cholesterol levels, could have a negative effect on steroidogenesis (371, 372).

The data available for humans regarding inadvertent exposure to statins during pregnancy is limited (373). A handful of studies have investigated the effects of *in utero* exposure to statins and, although teratogenic effects have been reported, most notably affecting the central nervous system and limbs (374), there is no conclusive evidence that exposure to statins increases the risk of congenital abnormalities. One study reported that the rate of con-

genital abnormalities in children exposed to statins (simvastatin or lovastatin) *in utero* (3.8%) was comparable to that in the general population (3%) (375). More importantly regarding this review, it was also reported that in this study of 477 individuals exposed to statins during fetal life, only one was reported to have hypospadias (375), an incidence similar to that in the normal population (5).

Data from animal studies on the effect of exposure to statins during pregnancy is equally lacking in evidence for inhibition of fetal testicular steroidogenesis. Studies in rats and rabbits exposed to atorvastatin during gestation only showed developmental toxicity at doses high enough to induce maternal toxicity (376). Although pups and litter sizes were smaller (maternal body weight and food consumption were also reduced), there were no incidences of fetal malformations, which would presumably include disorders of the reproductive tract. A more recent study investigated exposure of rats to statins from e6 to lactation d 20. Despite being exposed to statins throughout the masculinization programming window, there were no reports of genital abnormalities or effects on fertility of the offspring (369).

Whether statins interfere with human gonadal steroidogenesis during adult life has also been investigated in a number of studies. Although two studies have described a decline in free testosterone (although levels were still in the normal range) (377) or in total and bioavailable testosterone (378), a greater number of studies have concluded that therapeutic doses of statins do not affect testicular steroidogenesis. Individuals have been exposed to pravastatin, simvastatin, lovastatin, or atorvastatin from 3–36 months, and all have reported no change in plasma total, free or hCG-stimulated testosterone, or plasma LH and FSH (379–386). Similarly, in adult rats exposed to simvastatin for 12 wk, no effects on basal plasma testosterone, LH, or FSH were reported (387), and *in vitro* no alterations in testosterone production by mouse Leydig cells were found after culture with lovastatin for 12 h (388). Therefore, based on analysis of studies involving fetal or adult exposure to statins, it appears that they do not significantly impair steroidogenesis in either humans or rodents, at least at therapeutic levels.

#### H. Phthalate esters (phthalates)

Phthalates, or phthalate esters, are a group of chemicals used principally as plasticizers and in the manufacture of a variety of products, including cosmetics and perfumes, medical equipment, pharmaceuticals, and building materials, although their use in other products (*e.g.*, toys) is now restricted in many countries (*e.g.*, the European Union). Indirect human exposure to phthalates is widespread because they are the most ubiquitous of all envi-

ronmental contaminants, and additionally there may be direct exposure via personal care products, certain medicines, and polyvinyl chloride (PVC)-containing devices (389). The effects of phthalate exposure on perinatal testosterone production (assessed as AGD) in humans has been investigated in several studies, the results of which are conflicting.

The first cross-sectional study (in the United States) examined 85 boys at 2–36 months of age and found a negative correlation between AGD (corrected for body weight) and the level of certain phthalate metabolites, including monobutyl phthalate (MBP) and monoethyl phthalate (MEP), found in maternal urine during pregnancy (390). A recent expansion of this study to include a total of 106 boys has confirmed the negative correlation between AGD and maternal (urinary) levels of phthalates, including MEP, MBP, monoethyl hexyl phthalate (MEHP) and the further MEHP metabolites, monoethyl hydroxyhexyl phthalate and monoethyl oxohexyl phthalate (391). Both of these studies also demonstrated that AGD correlated to penile volume/length (390, 391) and the incidence of cryptorchidism (390), similar to rat studies (9). Another study of 73 pregnant Mexican women in a hospital-based cohort investigated the association between exposure to MEHP, monobenzyl phthalate, MEP, and MBP during pregnancy and AGD in male newborns (392). This study found a statistically significant association between MEP exposure and reduced AGD and also between monobenzyl phthalate exposure and reduced penis length and width. These studies are consistent with the possibility that perinatal phthalate exposure can inhibit testosterone production in the male fetus (during the masculinization programming window), resulting in reduced AGD and penile volume/length, as well as inhibiting normal testis descent; such effects are in broad, but not total, agreement with studies in rats detailed below. However, one point of disagreement is with regard to diethyl phthalate and its metabolite MEP. In the cited human studies, MEP was negatively associated with AGD in boys, whereas rats exposed *in utero* to MEP, at even very high doses, show no effect on either fetal testosterone levels or AGD (393, 394).

In contrast to the above-mentioned studies, a smaller (prospective) study in Taiwan, involving 33 boys, found no relationship between levels of MBP or MEHP, measured in AF or maternal urine, during pregnancy, and AGD of the male offspring (395). This finding fits with two *in vitro* studies that have investigated the effects of MBP or MEHP on human fetal testis testosterone production. In the first study, second-trimester human fetal testis explants were cultured with MBP in short-term culture, but there was no effect on basal or hCG-stimulated tes-

tosterone production (350). In the second study, exposure of first-trimester human fetal testis explants to MEHP in the presence or absence of LH/hCG found no effect on testosterone production or on steroidogenic enzyme expression (99). The latter study did, however, demonstrate that MEHP has negative effects on germ cells, as it did in fetal rat testis explants, which makes the lack of effect on testosterone production more convincing. There is, however, always concern with the reliability of *in vitro* systems, especially given that e19.5 fetal rat testis explants cultured with MBP exhibited no effect on testosterone production, in sharp contrast to the inhibition demonstrated *in vivo*, at this age (350). Therefore, at present, it is unclear whether or not phthalates exert inhibitory effects on steroidogenesis by the human fetal testis because the available data are conflicting, and the only supporting evidence is indirect (AGD). However, a recent study that involved administration of high doses of MBP [the active metabolite of dibutyl phthalate (DBP)] to pregnant marmosets for a 7-wk period, which included the presumptive masculinization programming window, found no evidence for masculinization disorders or altered reproductive organ size at birth or in adulthood (396). This finding is consistent with the absence of effect of MBP on steroidogenesis *in vitro* by fetal human testis explants (350).

Testosterone levels are elevated also in the first 3–5 months after birth in boys, with the source being fetal-type Leydig cells (169, 397). One study investigated whether neonatal exposure to phthalate metabolites in breast milk was associated with any change in blood hormone levels in corresponding sons at 1–3 months of age (398). Breast milk levels of MBP were found to be negatively correlated with free (biologically active) testosterone, and a positive relationship was also found between breast milk levels of monomethyl phthalate, MEP, and MBP and the LH:free testosterone ratio. This could indicate that testosterone production is impaired but has been compensated for by increased LH. Although this would be in general agreement with the findings described above for gestational phthalate exposure and AGD in sons, there is another potential explanation because a positive association was found between breast milk phthalate levels and SHBG levels in this study (398). An increase in SHBG would result in less free testosterone because more would be able to bind to SHBG, and this would result in an increase in LH because of reduced negative feedback, thus explaining the increased LH:free testosterone ratio observed without the need to invoke direct inhibition of steroidogenesis by the phthalates. Phthalates are known to act on the liver, which is also the source of SHBG, but it is unknown whether phthalate exposure affects SHBG production. Only one other study has previously investigated phtha-

late exposure and SHBG levels (in adult men), and it found no effect (399).

Perhaps the best data to support the view that phthalates can directly inhibit steroidogenesis by the neonatal (human) testis come from a study in which neonatal male marmosets were administered a high dose (500 mg/kg/d) of MBP (350). This resulted in an initial approximately 50% reduction in testosterone levels 5 h later, followed by compensation, presumably by increased LH secretion, because increased Leydig cell numbers/volume were found in all MBP-exposed infants after 14 d of MBP treatment (350). The marmoset produces SHBG (400), but there have been no investigations into the effects of phthalates on SHBG levels in this species, so it is not possible to exclude an effect of MBP on SHBG levels in this study. However, it seems intuitively unlikely that an approximately 50% decrease in testosterone levels 5 h after MBP exposure could be explained by an effect on SHBG because changes in SHBG tend to be sluggish, not rapid. Studies utilizing rodent models of neonatal phthalate exposure cannot be used to clarify this issue because rodents do not produce SHBG. Demonstration of a (transient) inhibitory effect of MBP on testosterone production in neonatal male marmosets may appear at odds with the absence of any evidence for masculinization defects after similar exposure *in utero* (396). However, these findings would be reconciled if, in both situations, high exposure to either CG (pregnancy) or LH (neonatal-compensatory increase) was able to overcome any MBP-induced inhibition of steroidogenesis. If so, the same would be likely in the human, although none of the limited human *in vivo* or *in vitro* studies described above support this interpretation.

Studies that have investigated exposure of adult men to phthalates also show conflicting results with regard to possible effects on steroidogenesis. A study of men working in a PVC factory, and thus occupationally exposed to phthalates, showed a modest and significant reduction in serum free testosterone in workers with high levels of urinary MBP and MEHP, compared with unexposed workers (401). However, a cross-sectional study of 295 men attending an andrology clinic in Massachusetts found no association between phthalate levels in urine and serum levels of testosterone (399), although in this instance phthalate exposure would have been notably lower than for the PVC workers. Moreover, if the rat is any guide, then adult human Leydig cells may be relatively insensitive to the effect of phthalates. Thus, treatment of prepubertal rats with 200 mg/kg/d diethyl hexyl phthalate (DEHP) from postnatal d 21–35 caused a 50% reduction in serum testosterone levels (402), whereas the same or higher doses administered to adult rats had little or no effect (402, 403). Although one study has shown a massive inhibitory effect

(>90%) of MEHP on LH-stimulated testosterone production by adult rat primary Leydig cells over 2 h of culture, this was found only after exposure to 1 mM MEHP, and no effect was found with a 10-fold lower dose (404).

In contrast to the data in humans, there is unequivocal evidence that certain phthalates can profoundly inhibit testosterone production by the fetal rat testis. Thus, administration of phthalates to pregnant rats during the last week or so of gestation results in reduced AGD and reproductive malformations, including hypospadias, in the Long Evans (351), Sprague-Dawley (405), and Wistar (406) strains of rat. These changes are consistent with reduced fetal androgen exposure, and this has been demonstrated directly after *in utero* exposure to a number of phthalates, including DEHP (364, 393, 407), DBP (364, 408–410), butyl benzyl phthalate (364), diisobutyl phthalate (315), diisononyl phthalate (393), and diisooheptyl phthalate (411). Several of these compounds have been shown to cause dose-dependent suppression of fetal testicular testosterone production, and for the most potent (DEHP and DBP), this occurs at doses above 100–250 mg/kg/d. Other phthalates, such as diethyl phthalate, dimethyl phthalate, dioctyl phthalate, and diisodecyl phthalate, do not affect fetal rat testicular testosterone production or AGD (393, 394). Molecular analyses in fetal rat testes after *in utero* exposure to phthalates has shed light on the potential mechanisms via which phthalates suppress testicular testosterone production. Several of the key genes involved in steroidogenesis (Fig. 1) are down-regulated after *in utero* exposure to DBP or MEHP. These genes are StAR, HMG-CoA synthase, and SRB1 (all involved in cholesterol uptake/transport), and the steroidogenic enzymes *Cyp11a*,  $\beta$ -Hsd, and *Cyp17* (410, 412–414). Suppression of these various enzymes provides a convincing explanation for the phthalate-induced reduction in fetal testicular testosterone production.

Based on present evidence, it appears that all of the phthalates that affect testosterone production by the fetal testis do so by similar mechanisms, although the dose-response characteristics may differ; in this regard, DBP and DEHP are the most potent and are approximately equipotent, based on the above cited studies.

In contrast to the consistent effects of DBP and DEHP on fetal testicular testosterone production in the rat, data for exposure of fetal mice to DBP or DEHP have produced equivocal results. A detailed study showed that administration of single or multiple doses of DBP (up to 1500 mg/kg/d) or MEHP (up to 1000 mg/kg/d) to pregnant mice did not reduce testicular testosterone levels or affect the expression of the steroidogenic enzyme genes, as seen in the rat (415); this was shown in two strains of mice (C57Bl6, G3H/HeJ). In contrast, a recent study in C57Bl6

mice treated with 100, 200, or 500 mg/kg/d DEHP from e12–e17 reported that this dose-dependently induced hypospadias on e19, with males from the top dose group exhibiting a 75.7% incidence of hypospadias and a 13% reduction in AGD (416). In addition to conflicting with the study by Gaido *et al.* (415), this study also conflicts with data for the rat exposed to similar levels of DBP or DEHP because effects on AGD (measured postnatally) are of similar magnitude to those reported for the mice, but the rates of hypospadias reported are considerably less in the rats, ranging from 12–37% (393, 408, 417), an observation that is explained by the relatively poor suppression of testosterone levels by DBP in rats during the masculinization programming window (8). No other toxicological studies involving fetal exposure of mice to phthalates that cause fetal testis effects in rats have reported hypospadias (418, 419), although it is uncertain whether or not this was specifically sought. Another study has reported that DEHP can reduce insulin-like factor 3 mRNA expression by fetal mouse Leydig cells *in vivo* and *in vitro*, but effects on steroidogenesis were not studied (420). The conflict over fetal testis effects of phthalates in mice is not clarified by studies on isolated Leydig cells from postnatal mice because positive effects on steroidogenesis have been reported (421), whereas negative effects of MEHP have been reported on MA-10 tumor Leydig cells (422). However, a very recent study (423) perhaps reconciles these disparate findings for phthalate effects in mice. It shows that whether MEHP has inhibitory or stimulatory effects on steroidogenesis in fetal mouse testes cultured over 1–3 d depends on fetal age, culture duration, and the presence/absence of LH. Notably, no inhibition of basal testosterone production was observed at any age, but in particular at e13.5 (corresponding to part of the masculinization programming window), and this is in marked contrast to the studies in rats.

### I. Linuron

Linuron is a urea-based herbicide that acts as an anti-androgen via dual mechanistic actions. Linuron was first acknowledged to competitively antagonize rat and human AR and inhibit androgen-induced gene expression (365, 424, 425). However, more recent studies have shown that linuron also reduces fetal testosterone levels in the rat (364, 426), although there are no relevant data on human fetal exposure to linuron. In rats exposed *in utero* to doses ranging from 12.5–100 mg/kg/d linuron from e13–e18 or e14–e18, significant reductions in whole body testosterone levels (426), testicular testosterone concentrations, and testicular testosterone production (426) were reported at e18. Furthermore, one of the studies showed that linuron could similarly inhibit testosterone production by fetal rat testes *in vitro* (427). Unlike phthalates, this sup-

pression of steroidogenesis did not involve altered mRNA expression of StAR, Cyp11a, or Cyp17a expression (427). Unlike fetal exposure to prochloraz (364), however, progesterone levels are not increased after fetal exposure to linuron, indicating that inhibition of steroidogenesis must occur before CYP17 activity (364) and, indeed before StAR, based on the mRNA expression profile (427). Therefore, the mechanism via which linuron interferes with fetal testosterone production remains unknown, but it could involve effects on LH receptor expression or activation. As was the case with human fetal exposure, there are currently no data on human adults after exposure to linuron. There are, however, a small number of studies that have exposed postnatal rats to linuron, although the results from these studies are not in full agreement with each other. One study exposed immature and mature rats to 200 mg/kg linuron for 2 wk and reported increased LH and estradiol levels but no change in testosterone levels (424). However, another study in which 150 mg/kg linuron was administered to adult male rats for 15 d reported reduced serum levels of testosterone, DHT, and LH and increased estradiol (428). Linuron has also been administered chronically to rats postnatally at doses of 10, 20, and 40 mg/kg, and in these animals, mean serum testosterone was reduced by 44%, but this was not statistically significant (351).

#### J. 2,3,7,8-Tetrachlorodibenzo-p-dioxin (TCDD; dioxin) and related compounds

Dioxin is a highly toxic by-product of many combustion processes (e.g., by industrial incinerators) to which humans are exposed, and it has been shown in animal studies to affect development and function of the male reproductive system (see below). Two major accidents (Seveso, Italy, 1976; and Yucheng, Taiwan, 1979) have occurred that resulted in especially high exposure to polychlorinated dibenzofurans or polychlorinated dibenzo-*p*-dioxins (dioxin) in humans, and both included pregnant women. Subsequent evaluations of males exposed *in utero* in these situations have not reported any masculinization disorders, although one male showed reduced sperm motility/morphology (429) and another showed significantly reduced sperm counts (430). The latter could reflect reduced Sertoli cell number as a result of reduced androgen action perinatally (Fig. 4), but presumably this did not include any major inhibition of testosterone production during the masculinization programming window because of the absence of genital disorders.

Several studies in rats have used a single (maternal) administration of a range of doses of dioxin on e15.5 (i.e., at the start of the masculinization programming window) and variously reported small decreases in adult testis size/sperm counts and reductions in size of the penis, prostate,

seminal vesicles, and AGD (431–434). The latter effects are all consistent with suppression of androgen production/action during the masculinization programming window (9), although this has not been demonstrated directly. One study (433) has shown dioxin-induced suppression of fetal plasma testosterone, and others have shown suppression of StAR (435) or CYP17 (436) mRNA expression later in gestation (e18.5 or e20.5), but these later gestation changes may be secondary to dioxin-induced suppression of LH secretion (437) and can be prevented by *in utero* administration of equine CG (435, 436). Although the dioxin effects appear repeatable, there are notable strain differences in the response of rats that may explain why one study reported that dioxin exposure increased fetal plasma testosterone levels (247). Moreover, in contrast to rats, mice appear largely unaffected by fetal dioxin exposure (438).

The much milder phenotypic consequences of fetal dioxin exposure in humans compared with rats could reflect species differences or could be because the human studies did not segregate men according to the gestational age at which their dioxin exposure occurred (most were exposed too late for any effect in the masculinization programming window). Alternatively, even the accidentally high dioxin exposure in the human studies may have been below that necessary to trigger any effects. Irrespective of the explanation, the animal experimental studies illustrate that both species and gestational age are important determinants of effects on steroidogenesis by the fetal testis and the mechanisms of effect.

## VII. Conclusions and Unanswered Questions

The masculinization process in humans and rodents is remarkably similar, and, insofar as we understand them, the mechanisms involved and their complete dependence on androgen production/action are more or less the same (9). Despite this, there are notable differences in the stimulatory mechanisms for testicular steroidogenesis between humans (CG/LH-dependent) and rodents (CG/LH-independent) during the period when masculinization of the reproductive tract is being programmed, and this is reflected in differing consequences when LH receptor function is abnormal. Such contrasts highlight the crucial dependence of steroidogenesis by the fetal rodent testis on paracrine factors, whereas such factors are either unnecessary or of minor or transient importance in the human. It is remarkable that the identity of the “physiological” paracrine regulators of fetal testis steroidogenesis in rodents remains so poorly understood, and this is an important issue to resolve. Identification of these factors would make it easier to identify what factors can disrupt their

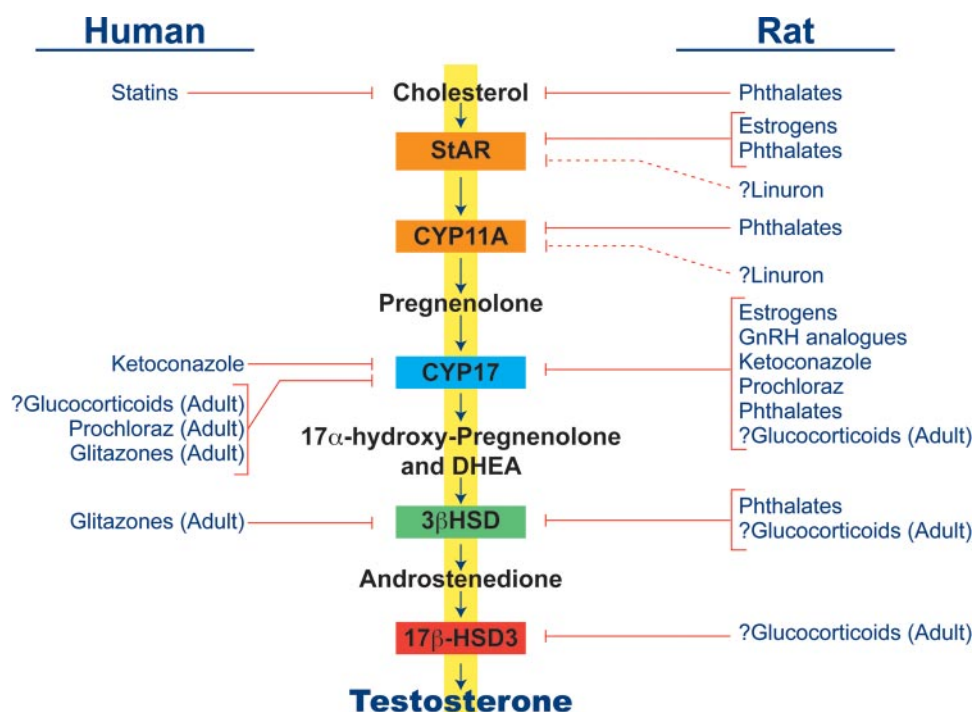

**FIG. 5.** Summary diagram that compares the known points in the steroidogenic cascade at which therapeutic and environmental compounds can impact negatively on testosterone production by the fetal testis in the human and rat. Where the only information available derives from study of the adult testis, this is indicated in *parentheses*. A site of action for dioxins in rats is not shown because its inhibition of StAR and CYP17 may be secondary to LH suppression. Note that  $\Delta^4$  and  $\Delta^5$  pathways are not shown in this diagram for the sake of clarity but are illustrated in Fig. 1 for the human and rats/mice. Note that this summary diagram does not apply in every instance to mice because GnRH agonists, phthalates (and dioxins) are largely without effect in this species (see Sections VI. D, VI. H, and VI. J).

function as well as paving the way for evaluating their importance in the human, and if so, when they occur in fetal life.

The process of steroidogenesis in humans and rodents is not identical with, for example, the  $\Delta^5$  pathway being preferred in the human and the  $\Delta^4$  pathway in rodents (Fig. 1), and this can affect sensitivity to inhibition by compounds such as ketoconazole and prochloraz (Fig. 5). Much starker differences are evident in the susceptibility of testicular steroidogenesis to inhibition by other factors, such as estrogens and GnRH analogs, both of which markedly inhibit in the rat but appear to be devoid of effect on the fetal human testis (Fig. 5), although this is based on rather few studies for the human. Nevertheless, the coincidence of absence of effect with absence of demonstrable receptors for GnRH and for ER $\alpha$  in fetal human Leydig cells is consistent and suggests that, for example, susceptibility of masculinization to disruption by environmental estrogenic chemicals may not be a concern, at least via suppression of steroidogenesis.

Arguably the most important unresolved issue is whether phthalates or their metabolites can inhibit testicular steroidogenesis by the fetal human testis as occurs in rats. Present conclusions based on (indirect) associations between maternal phthalate exposure and lower AGD in resulting sons, indicating potential effects at environmen-

tal phthalate levels in humans (and by a wider range of phthalates than in rats), contrasts with the absence of effect of MBP/MEHP on steroidogenesis *in vitro* by human fetal testis explants. Straightforward interpretation of these conflicting results is not currently possible, but because of the substantial human health implications, it is vital that further studies are able to resolve which of the findings is correct. However, this uncertainty over phthalate effects also illustrates the practical difficulties inherent in assessing whether compounds affect the human fetal testis because this has to depend either on indirect assessment (association of maternal exposures with masculinization disorders, such as reduced AGD, in resulting sons) or on studies using fetal testis cultures, both of which present interpretation problems. In the case of indirect associations with AGD, account has to be taken of the fact that humans are exposed simultaneously to many environmental chemicals, including multiple compounds that may interfere additively with androgen action/masculinization according to animal studies (394). Therefore, separating phthalate effects from those of these other compounds poses difficulties. Conversely, although fetal human testis cultures have the merit that direct effects of phthalates and their metabolites can be studied, confidence in negative data derived from such cultures is only complete if the *in vitro* system can be shown to accurately

reflect what occurs *in vivo*. Studies using grafts of fetal testis tissue into nude mice that are then treated with phthalates may represent a compromise approach for future studies but may still leave room for uncertainty.

Perhaps one of the most surprising outcomes of the present comparison is the fundamentally different response of rat and mouse fetal Leydig cells to certain compounds. Thus, in rats, GnRH agonists, certain phthalates, and dioxins all impair steroidogenesis by fetal Leydig cells, whereas these same factors have minimal or no effects on mouse fetal Leydig cells. In other respects, for example their response to estrogens, Leydig cells from both species show a similar response. Considering also the fundamental differences in response of rat and human fetal Leydig cells to some of the evaluated compounds, it is evident that considerable care should be exercised in extrapolating effects from one species to another if no direct data are available.

It is apparent from the lack of effect of statins (at therapeutic doses) on fetal testicular steroidogenesis in either rodents or humans that compounds that target cholesterol supply are probably benign in their steroidogenic effects because alternative sources of cholesterol can be used. However, once the supply route narrows down to just one pathway, as with the transport of cholesterol to the inner mitochondrial membrane via StAR, any disruption has marked effects, as illustrated by mutations in the StAR gene. A similar remark probably applies also to the enzyme cascade downstream from StAR because there are no alternative pathways. More compounds target CYP17 and impair its expression/function than any other step in testicular steroidogenesis, although it is unclear why this is so, apart from the fact that, physiologically, it is also a highly regulated step.

## Acknowledgments

We are grateful to Professor Ilpo Huhtaniemi for advice on LH receptor mutations.

Address all correspondence and requests for reprints to: Richard M. Sharpe, MRC Human Reproductive Sciences Unit, Centre for Reproductive Biology, The Queen's Medical Research Institute, 47 Little France Crescent, Edinburgh, EH16 4TJ, UK. E-mail: r.sharpe@hru.s.mrc.ac.uk.

This review was funded, in part, by Grant LRI-EMSG-MRC-0808 from the Long Range Research Initiative of the International Council of Chemical Associations, which includes the European Chemical Industry Council, the Japanese Chemical Industry Council, and the American Chemistry Council. The funders did not contribute in any material way to the design, content, and interpretations/conclusions voiced in the review but did provide minor comments on a penultimate draft.

Disclosure Summary: H.M.S., J.I.M., and R.M.S. received funding from the Long Range Research Initiative of the International Council of Chemical Associations, which includes the European Chemical Industry Council, the Japanese Chemical Industry Council, and the American

Chemistry Council. J.I.M. is a consultant for Viamet Pharmaceuticals and R.M.S. has consulted for Johnson & Johnson. R.M.S. has shares in GlaxoSmithKline.

## References

1. Hughes IA 2001 Minireview: sex differentiation. *Endocrinology* 142:3281–3287
2. Baskin LS, Himes K, Colborn T 2001 Hypospadias and endocrine disruption: is there a connection? *Environ Health Perspect* 109:1175–1183
3. Boisen KA, Kaleva M, Main KM, Virtanen HE, Haavisto AM, Schmidt IM, Chellakooty M, Damgaard IN, Mau C, Reunanen M, Skakkebaek NE, Toppari J 2004 Difference in prevalence of congenital cryptorchidism in infants between two Nordic countries. *Lancet* 363:1264–1269
4. Virtanen HE, Bjerknes R, Cortes D, Jørgensen N, Rajpert-De Meyts E, Thorsson AV, Thorup J, Main KM 2007 Cryptorchidism: classification, prevalence and long-term consequences. *Acta Paediatr* 96:611–616
5. Paulozzi LJ 1999 International trends in rates of hypospadias and cryptorchidism. *Environ Health Perspect* 107:297–302
6. Skakkebaek NE, Rajpert-De Meyts E, Main KM 2001 Testicular dysgenesis syndrome: an increasingly common developmental disorder with environmental aspects. *Hum Reprod* 16:972–978
7. Sharpe RM, Skakkebaek NE 2008 Testicular dysgenesis syndrome: mechanistic insights and potential new downstream effects. *Fertil Steril* 89:e33–e38
8. Scott HM, Hutchison GR, Jobling MS, McKinnell C, Drake AJ, Sharpe RM 2008 Relationship between androgen action in the “male programming window,” fetal Sertoli cell number, and adult testis size in the rat. *Endocrinology* 149:5280–5287
9. Welsh M, Saunders PT, Fisker M, Scott HM, Hutchison GR, Smith LB, Sharpe RM 2008 Identification in rats of a programming window for reproductive tract masculinization, disruption of which leads to hypospadias and cryptorchidism. *J Clin Invest* 118:1479–1490
10. Welsh M, Macleod DJ, Walker M, Smith LB, Sharpe RM 28 July 2009 Critical androgen-sensitive periods of rat penis and clitoris development. *Int J Androl* 10.1111/j.1365-2605.2009.00978.x
11. Bray F, Richiardi L, Ekblom A, Pukkala E, Cuninkova M, Møller H 2006 Trends in testicular cancer incidence and mortality in 22 European countries: continuing increases in incidence and declines in mortality. *Int J Cancer* 118:3099–3111
12. Toppari J, Larsen JC, Christiansen P, Giwercman A, Grandjean P, Guillelte Jr LJ, Jegou B, Jensen TK, Jouannet P, Keiding N, Leffers H, McLachlan JA, Meyer O, Muller J, Rajpert-De Meyts E, Scheike T, Sharpe R, Sumpter J, Skakkebaek NE 1996 Male reproductive health and environmental xenoestrogens. *Environ Health Perspect* 104(Suppl 4):741–803
13. Kraemer FB, Shen WJ, Harada K, Patel S, Osuga J, Ishibashi S, Azhar S 2004 Hormone-sensitive lipase is required for high-density lipoprotein cholesterol ester-supported adrenal steroidogenesis. *Mol Endocrinol* 18:549–557
14. Payne AH, Youngblood GL 1995 Regulation of expression

- of steroidogenic enzymes in Leydig cells. *Biol Reprod* 52: 217–225
15. Rainey WE 2005 Implantation, embryogenesis and placental development. 22nd ed. New York: McGraw-Hill
  16. Cao G, Zhao L, Stangl H, Hasegawa T, Richardson JA, Parker KL, Hobbs HH 1999 Developmental and hormonal regulation of murine scavenger receptor, class B, type 1. *Mol Endocrinol* 13:1460–1473
  17. Landschulz KT, Pathak RK, Rigotti A, Krieger M, Hobbs HH 1996 Regulation of scavenger receptor, class B, type I, a high density lipoprotein receptor, in liver and steroidogenic tissues of the rat. *J Clin Invest* 98:984–995
  18. Carr BR, Parker Jr CR, Ohashi M, MacDonald PC, Simpson ER 1983 Regulation of human fetal testicular secretion of testosterone: low-density lipoprotein-cholesterol and cholesterol synthesized de novo as steroid precursor. *Am J Obstet Gynecol* 146:241–247
  19. Sato R, Takano T 1995 Regulation of intracellular cholesterol metabolism. *Cell Struct Funct* 20:421–427
  20. Mascaró C, Nadal A, Hegardt FG, Marrero PF, Haro D 2000 Contribution of steroidogenic factor 1 to the regulation of cholesterol synthesis. *Biochem J* 350:785–790
  21. Rigotti A, Trigatti BL, Penman M, Rayburn H, Herz J, Krieger M 1997 A targeted mutation in the murine gene encoding the high density lipoprotein (HDL) receptor scavenger receptor class B type I reveals its key role in HDL metabolism. *Proc Natl Acad Sci USA* 94:12610–12615
  22. Azhar S, Reaven E 2007 Regulation of Leydig cell cholesterol metabolism. Totowa, NJ: Humana Press
  23. Thompson CJ, Ross SM, Gaido KW 2004 Di(n-butyl) phthalate impairs cholesterol transport and steroidogenesis in the fetal rat testis through a rapid and reversible mechanism. *Endocrinology* 145:1227–1237
  24. Farkash Y, Timberg R, Orly J 1986 Preparation of antiserum to rat cytochrome P-450 cholesterol side chain cleavage, and its use for ultrastructural localization of the immunoreactive enzyme by protein A-gold technique. *Endocrinology* 118:1353–1365
  25. Stocco DM 2001 Tracking the role of a star in the sky of the new millennium. *Mol Endocrinol* 15:1245–1254
  26. Arakane F, Kallen CB, Watari H, Foster JA, Sepuri NB, Pain D, Stayrook SE, Lewis M, Gerton GL, Strauss 3rd JF 1998 The mechanism of action of steroidogenic acute regulatory protein (StAR). StAR acts on the outside of mitochondria to stimulate steroidogenesis. *J Biol Chem* 273: 16339–16345
  27. Dubé C, Bergeron F, Vaillant MJ, Robert NM, Brousseau C, Tremblay JJ 2009 The nuclear receptors SF1 and LRH1 are expressed in endometrial cancer cells and regulate steroidogenic gene transcription by cooperating with AP-1 factors. *Cancer Lett* 275:127–138
  28. Ascoli M, Fanelli F, Segaloff DL 2002 The lutropin/choriogonadotropin receptor, a 2002 perspective. *Endocr Rev* 23:141–174
  29. Poderoso C, Maloberti P, Duarte A, Neuman I, Paz C, Maciel FC, Podesta EJ 2009 Hormonal activation of a kinase cascade localized at the mitochondria is required for StAR protein activity. *Mol Cell Endocrinol* 300:37–42
  30. Miller WL 2005 Disorders of androgen synthesis—from cholesterol to dehydroepiandrosterone. *Med Princ Pract* 14(Suppl 1):58–68
  31. Rone MB, Fan J, Papadopoulos V 2009 Cholesterol transport in steroid biosynthesis: role of protein-protein interactions and implications in disease states. *Biochim Biophys Acta* 1791:646–658
  32. Payne AH, Hales DB 2004 Overview of steroidogenic enzymes in the pathway from cholesterol to active steroid hormones. *Endocr Rev* 25:947–970
  33. Hume R, Kelly RW, Taylor PL, Boyd GS 1984 The catalytic cycle of cytochrome P-450<sub>scc</sub> and intermediates in the conversion of cholesterol to pregnenolone. *Eur J Biochem* 140:583–591
  34. Saez JM 1994 Leydig cells: endocrine, paracrine, and autocrine regulation. *Endocr Rev* 15:574–626
  35. Zirkin BR, Chen H 2000 Regulation of Leydig cell steroidogenic function during aging. *Biol Reprod* 63:977–981
  36. Zuber MX, Mason JI, Simpson ER, Waterman MR 1988 Simultaneous transfection of COS-1 cells with mitochondrial and microsomal steroid hydroxylases: incorporation of a steroidogenic pathway into nonsteroidogenic cells. *Proc Natl Acad Sci USA* 85:699–703
  37. Kim CJ, Lin L, Huang N, Quigley CA, AvRuskin TW, Achermann JC, Miller WL 2008 Severe combined adrenal and gonadal deficiency caused by novel mutations in the cholesterol side chain cleavage enzyme, P450<sub>scc</sub>. *J Clin Endocrinol Metab* 93:696–702
  38. Tajima T, Fujieda K, Kouda N, Nakae J, Miller WL 2001 Heterozygous mutation in the cholesterol side chain cleavage enzyme (p450<sub>scc</sub>) gene in a patient with 46,XY sex reversal and adrenal insufficiency. *J Clin Endocrinol Metab* 86:3820–3825
  39. Pang S, Yang X, Wang M, Tissot R, Nino M, Manaligod J, Bullock LP, Mason JI 1992 Inherited congenital adrenal hyperplasia in the rabbit: absent cholesterol side-chain cleavage cytochrome P450 gene expression. *Endocrinology* 131:181–186
  40. Coffey JC, Aronin PA, French FS, Nayfeh SN 1972 Steroid metabolism by testicular homogenates of the Stanley-Gumbreck pseudohermaphrodite male rat. I. Increased formation of androsterone and androstanediol. *Steroids* 19:433–454
  41. Payne AH, O'Shaughnessy P 1996 Structure, function and regulation of steroidogenic enzymes in the Leydig cell. In: Payne AH, Hardy MP, Russell LD, eds. *The Leydig cell*. 1st ed. Vienna, IL: Cache River Press; 259–286
  42. Hammar M, Petersson F 1986 Testosterone production in vitro in human testicular tissue. *Andrologia* 18:196–200
  43. Preslock JP, Steinberger E 1977 Testicular steroidogenesis in the common marmoset, *Callithrix jacchus*. *Biol Reprod* 17:289–293
  44. Rajfer J, Sikka SC, Swerdloff RS 1987 Lack of a direct effect of gonadotropin hormone-releasing hormone agonist on human testicular steroidogenesis. *J Clin Endocrinol Metab* 64:62–67
  45. Rey R, Campo S, Ayuso S, Nagle C, Chemes H 1995 Testicular steroidogenesis in the Cebus monkey throughout postnatal development. *Biol Reprod* 52:997–1002
  46. Flück CE, Miller WL, Auchus RJ 2003 The 17, 20-lyase activity of cytochrome p450<sub>c17</sub> from human fetal testis favors the  $\Delta 5$  steroidogenic pathway. *J Clin Endocrinol Metab* 88:3762–3766
  47. Swart P, Swart AC, Waterman MR, Estabrook RW, Mason JI 1993 Progesterone 16  $\alpha$ -hydroxylase activity is catalyzed

- by human cytochrome P450 17  $\alpha$ -hydroxylase. *J Clin Endocrinol Metab* 77:98–102
48. Tremblay Y, Fleury A, Beaudoin C, Vallée M, Bélanger A 1994 Molecular cloning and expression of guinea pig cytochrome P450c17 cDNA (steroid 17  $\alpha$ -hydroxylase/17,20 lyase): tissue distribution, regulation, and substrate specificity of the expressed enzyme. *DNA Cell Biol* 13:1199–1212
  49. Bell JB, Vinson GP, Hopkin DJ, Lacy D 1968 Pathways for androgen biosynthesis from [7  $\alpha$ -3H] pregnenolone and [4-14C]progesterone by rat testis interstitium in vitro. *Biochim Biophys Acta* 164:412–420
  50. Kwan TK, Pertiwi AK, Taylor NF, Gower DB 1988 Steroid profiling in the study of rat testicular steroidogenesis. *Biochim Biophys Acta* 962:214–219
  51. Samuels LT, Busmann L, Matsumoto K, Huseby RA 1975 Organization of androgen biosynthesis in the testis. *J Steroid Biochem* 6:291–296
  52. Andersson S, Moghrabi N 1997 Physiology and molecular genetics of 17  $\beta$ -hydroxysteroid dehydrogenases. *Steroids* 62:143–147
  53. Krone N, Hanley NA, Arlt W 2007 Age-specific changes in sex steroid biosynthesis and sex development. *Best Pract Res Clin Endocrinol Metab* 21:393–401
  54. Hardy MP, Zirkin BR, Ewing LL 1989 Kinetic studies on the development of the adult population of Leydig cells in testes of the pubertal rat. *Endocrinology* 124:762–770
  55. Tapanainen J, Kuopio T, Pelliniemi LJ, Huhtaniemi I 1984 Rat testicular endogenous steroids and number of Leydig cells between the fetal period and sexual maturity. *Biol Reprod* 31:1027–1035
  56. Mancini RE, Vilar O, Lavieri JC, Andrada JA, Heinrich JJ 1963 Development of Leydig cells in the normal human testis. A cytological, cytochemical and quantitative study. *Am J Anat* 112:203–214
  57. Lala DS, Rice DA, Parker KL 1992 Steroidogenic factor I, a key regulator of steroidogenic enzyme expression, is the mouse homolog of fushi tarazu-factor I. *Mol Endocrinol* 6:1249–1258
  58. Morohashi K, Honda S, Inomata Y, Handa H, Omura T 1992 A common trans-acting factor, Ad4-binding protein, to the promoters of steroidogenic P-450s. *J Biol Chem* 267:17913–17919
  59. Parker KL, Schimmer BP 1995 Transcriptional regulation of the genes encoding the cytochrome P-450 steroid hydroxylases. *Vitam Horm* 51:339–370
  60. Ramayya MS, Zhou J, Kino T, Segars JH, Bondy CA, Chrousos GP 1997 Steroidogenic factor 1 messenger ribonucleic acid expression in steroidogenic and nonsteroidogenic human tissues: Northern blot and in situ hybridization studies. *J Clin Endocrinol Metab* 82:1799–1806
  61. Waterman MR, Keeney DS 1996 Signal transduction pathways combining peptide hormones and steroidogenesis. *Vitam Horm* 52:129–148
  62. Anakwe OO, Payne AH 1987 Noncoordinate regulation of de novo synthesis of cytochrome P-450 cholesterol side-chain cleavage and cytochrome P-450 17  $\alpha$ -hydroxylase/C17–20 lyase in mouse Leydig cell cultures: relation to steroid production. *Mol Endocrinol* 1:595–603
  63. Waterman MR 1994 Biochemical diversity of cAMP-dependent transcription of steroid hydroxylase genes in the adrenal cortex. *J Biol Chem* 269:27783–27786
  64. Brinkmann AO, Leemborg FG, Rommerts FF, van der Molen HJ 1984 Differences between the regulation of cholesterol side-chain cleavage in Leydig cells from mice and rats. *J Steroid Biochem* 21:259–264
  65. Lu Y, McDonough A, Farley RA, Warren DW 1991 Regulation of testicular P-450 cholesterol side-chain cleavage and P-450 C17–20 lyase/C17 hydroxylase enzymes in the neonatal and adult rat. *Acta Endocrinol* 124:449–454
  66. Leinonen PJ, Jaffe RB 1985 Leydig cell desensitization by human chorionic gonadotropin does not occur in the human fetal testis. *J Clin Endocrinol Metab* 61:234–238
  67. Huhtaniemi I 1994 Fetal testis—a very special endocrine organ. *Eur J Endocrinol* 130:25–31
  68. Leers-Sucheta S, Morohashi K, Mason JI, Melner MH 1997 Synergistic activation of the human type II 3 $\beta$ -hydroxysteroid dehydrogenase/ $\Delta$ 5- $\Delta$ 4 isomerase promoter by the transcription factor steroidogenic factor-1/adrenal 4-binding protein and phorbol ester. *J Biol Chem* 272:7960–7967
  69. Clarke TR, Bain PA, Burmeister M, Payne AH 1996 Isolation and characterization of several members of the murine Hsd3b gene family. *DNA Cell Biol* 15:387–399
  70. Payne AH, Sha LL 1991 Multiple mechanisms for regulation of 3 $\beta$ -hydroxysteroid dehydrogenase/ $\Delta$ 5- $\Delta$ 4-isomerase, 17  $\alpha$ -hydroxylase/C17–20 lyase cytochrome P450, and cholesterol side-chain cleavage cytochrome P450 messenger ribonucleic acid levels in primary cultures of mouse Leydig cells. *Endocrinology* 129:1429–1435
  71. Keeney DS, Mason JI 1992 Expression of testicular 3 $\beta$ -hydroxysteroid dehydrogenase/ $\Delta$ 5- $\Delta$ 4-isomerase: regulation by luteinizing hormone and forskolin in Leydig cells of adult rats. *Endocrinology* 130:2007–2015
  72. Baker PJ, Sha JH, O'Shaughnessy PJ 1997 Localisation and regulation of 17 $\beta$ -hydroxysteroid dehydrogenase type 3 mRNA during development in the mouse testis. *Mol Cell Endocrinol* 133:127–133
  73. O'Shaughnessy PJ, Baker PJ, Heikkilä M, Vainio S, McMahon AP 2000 Localization of 17 $\beta$ -hydroxysteroid dehydrogenase/17-ketosteroid reductase isoform expression in the developing mouse testis—androstenedione is the major androgen secreted by fetal/neonatal Leydig cells. *Endocrinology* 141:2631–2637
  74. Jameson JL 2004 Of mice and men: the tale of steroidogenic factor-1. *J Clin Endocrinol Metab* 89:5927–5929
  75. Köhler B, Lin L, Ferraz-de-Souza B, Wieacker P, Heidemann P, Schröder V, Biebermann H, Schnabel D, Grüters A, Achermann JC 2008 Five novel mutations in steroidogenic factor 1 (SF1, NR5A1) in 46,XY patients with severe underandrogenization but without adrenal insufficiency. *Hum Mutat* 29:59–64
  76. Parker KL, Rice DA, Lala DS, Ikeda Y, Luo X, Wong M, Bakke M, Zhao L, Frigeri C, Hanley NA, Stallings N, Schimmer BP 2002 Steroidogenic factor 1: an essential mediator of endocrine development. *Recent Prog Horm Res* 57:19–36
  77. Achermann JC, Ito M, Ito M, Hindmarsh PC, Jameson JL 1999 A mutation in the gene encoding steroidogenic factor-1 causes XY sex reversal and adrenal failure in humans. *Nat Genet* 22:125–126
  78. Achermann JC, Ozisik G, Ito M, Orun UA, Harmanci K, Gurakan B, Jameson JL 2002 Gonadal determination and adrenal development are regulated by the orphan nuclear

- receptor steroidogenic factor-1, in a dose-dependent manner. *J Clin Endocrinol Metab* 87:1829–1833
79. Coutant R, Mallet D, Lahlou N, Bouhours-Nouet N, Guichet A, Coupris L, Croué A, Morel Y 2007 Heterozygous mutation of steroidogenic factor-1 in 46,XY subjects may mimic partial androgen insensitivity syndrome. *J Clin Endocrinol Metab* 92:2868–2873
  80. Rodeck CH, Gill D, Rosenberg DA, Collins WP 1985 Testosterone levels in midtrimester maternal and fetal plasma and amniotic fluid. *Prenat Diagn* 5:175–181
  81. Abramovich DR, Rowe P 1973 Foetal plasma testosterone levels at mid-pregnancy and at term: relationship to foetal sex. *J Endocrinol* 56:621–622
  82. Reyes FI, Boroditsky RS, Winter JS, Faiman C 1974 Studies on human sexual development. II. Fetal and maternal serum gonadotropin and sex steroid concentrations. *J Clin Endocrinol Metab* 38:612–617
  83. Reyes FI, Winter JS, Faiman C 1973 Studies on human sexual development. I. Fetal gonadal and adrenal sex steroids. *J Clin Endocrinol Metab* 37:74–78
  84. Clements JA, Reyes FI, Winter JS, Faiman C 1976 Studies on human sexual development. III. Fetal pituitary and serum, and amniotic fluid concentrations of LH, CG, and FSH. *J Clin Endocrinol Metab* 42:9–19
  85. Grumbach MM, Kaplan SL 1973 Ontogenesis of growth hormone, insulin, prolactin and gonadotrophin secretion in the human foetus. In: Comline KS, Cross KW, Dawes GS, Nathanielsz PW, eds. *Foetal and neonatal physiology*. Cambridge, UK: Cambridge University Press; 462–487
  86. Habert R, Rouiller-Fabre V, Lecerf L, Levacher C, Saez JM 1992 Developmental changes in testosterone production by the rat testis *in vitro* during late fetal life. *Arch Androl* 29:191–197
  87. Pelliniemi LJ, Niemi M 1969 Fine structure of the human foetal testis. I. The interstitial tissue. *Z Zellforsch Mikrosk Anat* 99:507–522
  88. Tapanainen J, Kellokumpu-Lehtinen P, Pelliniemi L, Huhtaniemi I 1981 Age-related changes in endogenous steroids of human fetal testis during early and midpregnancy. *J Clin Endocrinol Metab* 52:98–102
  89. Takagi S, Yoshida T, Tsubata K, Ozaki H, Fujii TK, Nomura Y, Sawada M 1977 Sex differences in fetal gonadotropins and androgens. *J Steroid Biochem* 8:609–620
  90. Judd HL, Robinson JD, Young PE, Jones OW 1976 Amniotic fluid testosterone levels in midpregnancy. *Obstet Gynecol* 48:690–692
  91. Zondek T, Mansfield MD, Zondek LH 1977 Amniotic fluid testosterone and fetal sex determination in the first half of pregnancy. *Br J Obstet Gynaecol* 84:714–716
  92. Forest MG, Cathiard AM 1975 Pattern of plasma testosterone and  $\Delta^4$ -androstenedione in normal newborns: evidence for testicular activity at birth. *J Clin Endocrinol Metab* 41:977–980
  93. Simmons D, France JT, Keelan JA, Song L, Knox BS 1994 Sex differences in umbilical cord serum levels of inhibin, testosterone, oestradiol, dehydroepiandrosterone sulphate, and sex hormone-binding globulin in human term neonates. *Biol Neonate* 65:287–294
  94. Braunstein GD, Rasor J, Danzer H, Adler D, Wade ME 1976 Serum human chorionic gonadotropin levels throughout normal pregnancy. *Am J Obstet Gynecol* 126:678–681
  95. Kletzky OA, Rossman F, Bertolli SI, Platt LD, Mishell Jr DR 1985 Dynamics of human chorionic gonadotropin, prolactin, and growth hormone in serum and amniotic fluid throughout normal human pregnancy. *Am J Obstet Gynecol* 151:878–884
  96. Molsberry RL, Carr BR, Mendelson CR, Simpson ER 1982 Human chorionic gonadotropin binding to human fetal testes as a function of gestational age. *J Clin Endocrinol Metab* 55:791–794
  97. Lee CY, Ryan RJ 1973 Interaction of ovarian receptors with human luteinizing hormone and human chorionic gonadotropin. *Biochemistry* 12:4609–4615
  98. Dufau ML, Catt KJ, Tsuruhara T 1972 A sensitive gonadotropin responsive system: radioimmunoassay of testosterone production by the rat testis *in vitro*. *Endocrinology* 90:1032–1040
  99. Lambrot R, Muczynski V, Lécureuil C, Angenard G, Coffigny H, Pairault C, Moison D, Frydman R, Habert R, Rouiller-Fabre V 2009 Phthalates impair germ cell development in the human fetal testis *in vitro* without change in testosterone production. *Environ Health Perspect* 117:32–37
  100. Lambrot R, Coffigny H, Pairault C, Donnadiou AC, Frydman R, Habert R, Rouiller-Fabre V 2006 Use of organ culture to study the human fetal testis development: effect of retinoic acid. *J Clin Endocrinol Metab* 91:2696–2703
  101. Carr FE, Chin WW 1985 Absence of detectable chorionic gonadotropin subunit messenger ribonucleic acids in the rat placenta throughout gestation. *Endocrinology* 116:1151–1157
  102. Habert R, Picon R 1984 Testosterone, dihydrotestosterone and estradiol-17 $\beta$  levels in maternal and fetal plasma and in fetal testes in the rat. *J Steroid Biochem* 21:193–198
  103. Warren DW, Haltmeyer GC, Eik-Nes KB 1972 Synthesis and metabolism of testosterone in the fetal rat testis. *Biol Reprod* 7:94–99
  104. Warren DW, Huhtaniemi IT, Tapanainen J, Dufau ML, Catt KJ 1984 Ontogeny of gonadotropin receptors in the fetal and neonatal rat testis. *Endocrinology* 114:470–476
  105. Ward IL, Weisz J 1984 Differential effects of maternal stress on circulating levels of corticosterone, progesterone, and testosterone in male and female rat fetuses and their mothers. *Endocrinology* 114:1635–1644
  106. Weisz J, Ward IL 1980 Plasma testosterone and progesterone titers of pregnant rats, their male and female fetuses, and neonatal offspring. *Endocrinology* 106:306–316
  107. Scott HM, Hutchison GR, Mahood IK, Hallmark N, Welsh M, De Gendt K, Verhoeven G, O'Shaughnessy P, Sharpe RM 2007 Role of androgens in fetal testis development and dysgenesis. *Endocrinology* 148:2027–2036
  108. Baum MJ, Woutersen PJ, Slob AK 1991 Sex difference in whole-body androgen content in rats on fetal days 18 and 19 without evidence that androgen passes from males to females. *Biol Reprod* 44:747–751
  109. Aubert ML, Begeot M, Winiger BP, Morel G, Sizonenko PC, Dubois PM 1985 Ontogeny of hypothalamic luteinizing hormone-releasing hormone (GnRH) and pituitary GnRH receptors in fetal and neonatal rats. *Endocrinology* 116:1565–1576
  110. Eguchi Y, Sakamoto Y, Arishima K, Morikawa Y, Hashimoto Y 1975 Hypothalamic control of the pituitary-testicular re-

- lation in fetal rats: measurement of collective volume of Leydig cells. *Endocrinology* 96:504–507
111. Lalau JD, Aubert ML, Carmignac DF, Grégoire I, Dupouy JP 1990 Reduction in testicular function in rats. I. Reduction by a specific gonadotropin-releasing hormone antagonist in fetal rats. *Neuroendocrinology* 51:284–288
  112. Livera G, Delbes G, Pairault C, Rouiller-Fabre V, Habert R 2006 Organotypic culture, a powerful model for studying rat and mouse fetal testis development. *Cell Tissue Res* 324:507–521
  113. Chauvigné F, Menuet A, Lesné L, Chagnon MC, Chevrier C, Regnier JF, Angerer J, Jégou B 2009 Time- and dose-related effects of di-(2-ethylhexyl) phthalate and its main metabolites on the function of the rat fetal testis in vitro. *Environ Health Perspect* 117:515–521
  114. Livera G, Rouiller-Fabre V, Durand P, Habert R 2000 Multiple effects of retinoids on the development of Sertoli, germ, and Leydig cells of fetal and neonatal rat testis in culture. *Biol Reprod* 62:1303–1314
  115. Brennan J, Capel B 2004 One tissue, two fates: molecular genetic events that underlie testis versus ovary development. *Nat Rev Genet* 5:509–521
  116. Polanco JC, Koopman P 2007 Sry and the hesitant beginnings of male development. *Dev Biol* 302:13–24
  117. Sharpe RM 2006 Pathways of endocrine disruption during male sexual differentiation and masculinization. *Best Pract Res Clin Endocrinol Metab* 20:91–110
  118. George FW, Wilson JD 1994 Sex determination and differentiation. In: Knobil E, Neill JD, eds. *The physiology of reproduction*. 2nd ed. New York: Raven Press; 3–28
  119. Price D 1936 Normal development of the prostate and seminal vesicles of the rat, with a study of experimental post-natal modifications. *Am J Anat* 60:79–125
  120. Inomata T, Eguchi Y, Nakamura T 1985 Development of the external genitalia in rat fetuses. *Jikken Dobutsu* 34:439–444
  121. Jirasek JE 1977 Morphogenesis of the genital system in the human. *Birth Defects Orig Artic Ser* 13:13–39
  122. Wilhelm D, Koopman P 2006 The makings of maleness: towards an integrated view of male sexual development. *Nat Rev Genet* 7:620–631
  123. Wyndham NR 1943 A morphological study of testicular descent. *J Anat* 77:179–188.3
  124. Amann RP, Veeramachaneni DN 2007 Cryptorchidism in common eutherian mammals. *Reproduction* 133:541–561
  125. Brown GR, Nevison CM, Fraser HM, Dixson AF 1999 Manipulation of postnatal testosterone levels affects phallic and clitoral development in infant rhesus monkeys. *Int J Androl* 22:119–128
  126. Liu L, Cristiano AM, Southers JL, Reynolds JC, Bacher J, Brown G, Gilley RM, Tice TR, Banks SM, Loriaux LD, Cassorla F 1991 Effects of pituitary-testicular axis suppression in utero and during the early neonatal period with a long-acting luteinizing hormone-releasing hormone analog on genital development, somatic growth, and bone density in male cynomolgus monkeys in the first 6 months of life. *J Clin Endocrinol Metab* 73:1038–1043
  127. Wallen K, Maestripieri D, Mann DR 1995 Effects of neonatal testicular suppression with a GnRH antagonist on social behavior in group-living juvenile rhesus monkeys. *Horm Behav* 29:322–337
  128. Goy RW, Bercovitch FB, McBair MC 1988 Behavioral masculinization is independent of genital masculinization in prenatally androgenized female rhesus macaques. *Horm Behav* 22:552–571
  129. Arnold AP, Gorski RA 1984 Gonadal steroid induction of structural sex differences in the central nervous system. *Annu Rev Neurosci* 7:413–442
  130. McCarthy MM, Konkle AT 2005 When is a sex difference not a sex difference? *Front Neuroendocrinol* 26:85–102
  131. Husmann DA 2002 Micropenis: an animal model and its human correlates. *Adv Exp Med Biol* 511:41–54; discussion 54–56
  132. Wang MH, Baskin LS 2008 Endocrine disruptors, genital development, and hypospadias. *J Androl* 29:499–505
  133. Foresta C, Zuccarello D, Garolla A, Ferlin A 2008 Role of hormones, genes, and environment in human cryptorchidism. *Endocr Rev* 29:560–580
  134. Bearn JG 1968 Anencephaly and the development of the male genital tract. *Acta Paediatr Acad Sci Hung* 9:159–180
  135. Cavallo L, Altomare M, Palmieri P, Licci D, Carnimeo F, Mastro F 1981 Endocrine function in four anencephalic infants. *Horm Res* 15:159–166
  136. Blizzard RM, Alberts M 1956 Hypopituitarism, hypoadrenalism, and hypogonadism in the newborn infant. *J Pediatr* 48:782–792
  137. Perrin EV, Benirschke K 1958 Somatic sex of anencephalic infants. *J Clin Endocrinol Metab* 18:327–328
  138. Reid JD 1960 Congenital absence of the pituitary gland. *J Pediatr* 56:658–664
  139. Steiner MM, Boggs JD 1965 Absence of pituitary gland, hypothyroidism, hypoadrenalism and hypogonadism in a 17-year-old dwarf. *J Clin Endocrinol Metab* 25:1591–1598
  140. Brody S, Carlstroem G 1965 Human chorionic gonadotropin pattern in serum and its relation to the sex of the fetus. *J Clin Endocrinol Metab* 25:792–797
  141. Burns RK 1961 Role of hormones in the differentiation of sex. In: Young WC, ed. *Sex and internal secretions*. Baltimore: Williams, Wilkins; 76–158
  142. Pakarinen P, Kimura S, El-Ghani F, Pelliniemi LJ, Huhtaniemi I 2002 Pituitary hormones are not required for sexual differentiation of male mice: phenotype of the T/ebp/Nkx2.1 null mutant mice. *Endocrinology* 143:4477–4482
  143. Habert R, Picon R 1982 Control of testicular steroidogenesis in foetal rat: effect of decapitation on testosterone and plasma luteinizing hormone-like activity. *Acta Endocrinol (Copenh)* 99:466–473
  144. Migrenne S, Pairault C, Racine C, Livera G, Gélosio A, Habert R 2001 Luteinizing hormone-dependent activity and luteinizing hormone-independent differentiation of rat fetal Leydig cells. *Mol Cell Endocrinol* 172:193–202
  145. Pakarinen P, Proshlyakova E, Huhtaniemi I 1994 Pituitary-gonadal interactions in perinatal rats: relationships of plasma luteinizing hormone and testosterone concentrations, and pituitary levels of LH subunit mRNAs. *Neuroendocrinology* 60:42–49
  146. Jost A 1966 Problems of fetal endocrinology: the adrenal glands. *Recent Prog Horm Res* 22:541–574
  147. George FW, Catt KJ, Neaves WB, Wilson JD 1978 Studies on the regulation of testosterone synthesis in the fetal rabbit testis. *Endocrinology* 102:665–673
  148. George FW, Simpson ER, Milewich L, Wilson JD 1979

- Studies on the regulation of the onset of steroid hormone biosynthesis in fetal rabbit gonads. *Endocrinology* 105: 1100–1106
149. Wilson JD, Griffin JE, George FW 1980 Sexual differentiation: early hormone synthesis and action. *Biol Reprod* 22:9–17
  150. Cadman SM, Kim SH, Hu Y, González-Martínez D, Bouloux PM 2007 Molecular pathogenesis of Kallmann's syndrome. *Horm Res* 67:231–242
  151. Weiss J, Adams E, Whitcomb RW, Crowley Jr WF, Jameson JL 1991 Normal sequence of the gonadotropin-releasing hormone gene in patients with idiopathic hypogonadotropic hypogonadism. *Biol Reprod* 45:743–747
  152. Bouligand J, Ghervan C, Tello JA, Brailly-Tabard S, Salenave S, Chanson P, Lombès M, Millar RP, Guiochon-Mantel A, Young J 2009 Isolated familial hypogonadotropic hypogonadism and a GNRH1 mutation. *N Engl J Med* 360:2742–2748
  153. Franco B, Guioli S, Pragliola A, Incerti B, Bardoni B, Tonlorenzi R, Carrozzo R, Maestrini E, Pieretti M, Taillon-Miller P, Brown CJ, Willard HF, Lawrence C, Persico MG, Camerino G, Ballabio A 1991 A gene deleted in Kallmann's syndrome shares homology with neural cell adhesion and axonal path-finding molecules. *Nature* 353:529–536
  154. Legouis R, Hardelin JP, Levilliers J, Claverie JM, Compain S, Wunderle V, Millasseau P, Le Paslier D, Cohen D, Caterina D, Bougueleret L, Delemarre-Van de Waal H, Lutfalla G, Weissenbach J, Petit C 1991 The candidate gene for the X-linked Kallmann syndrome encodes a protein related to adhesion molecules. *Cell* 67:423–435
  155. Salenave S, Chanson P, Bry H, Pugeat M, Cabrol S, Carel JC, Murat A, Lecomte P, Brailly S, Hardelin JP, Dodé C, Young J 2008 Kallmann's syndrome: a comparison of the reproductive phenotypes in men carrying KAL1 and FGFR1/KAL2 mutations. *J Clin Endocrinol Metab* 93: 758–763
  156. Dodé C, Levilliers J, Dupont JM, De Paepe A, Le Dû N, Soussi-Yanicostas N, Coimbra RS, Delmaghani S, Compain-Nouaille S, Baverel F, Pêcheux C, Le Tessier D, Cruaud C, Delpech M, Speleman F, Vermeulen S, Amalfitano A, Bachelot Y, Bouchard P, Cabrol S, Carel JC, Delemarre-van de Waal H, Goulet-Salmon B, Kottler ML, Richard O, Sanchez-Franco F, Saura R, Young J, Petit C, Hardelin JP 2003 Loss-of-function mutations in FGFR1 cause autosomal dominant Kallmann syndrome. *Nat Genet* 33:463–465
  157. Pitteloud N, Meysing A, Quinton R, Acierno Jr JS, Dwyer AA, Plummer L, Fliers E, Boepple P, Hayes F, Seminara S, Hughes VA, Ma J, Bouloux P, Mohammadi M, Crowley Jr WF 2006 Mutations in fibroblast growth factor receptor 1 cause Kallmann syndrome with a wide spectrum of reproductive phenotypes. *Mol Cell Endocrinol* 254–255:60–69
  158. Tsai PS, Gill JC 2006 Mechanisms of disease: insights into X-linked and autosomal-dominant Kallmann syndrome. *Nat Clin Pract Endocrinol Metab* 2:160–171
  159. Pitteloud N, Zhang C, Pignatelli D, Li JD, Raivio T, Cole LW, Plummer L, Jacobson-Dickman EE, Mellon PL, Zhou QY, Crowley Jr WF 2007 Loss-of-function mutation in the prokineticin 2 gene causes Kallmann syndrome and normosmic idiopathic hypogonadotropic hypogonadism. *Proc Natl Acad Sci USA* 104:17447–17452
  160. Dodé C, Teixeira L, Levilliers J, Fouveaut C, Bouchard P, Kottler ML, Lespinasse J, Lienhardt-Roussie A, Mathieu M, Moerman A, Morgan G, Murat A, Toubanc JE, Wolczynski S, Delpech M, Petit C, Young J, Hardelin JP 2006 Kallmann syndrome: mutations in the genes encoding prokineticin-2 and prokineticin receptor-2. *PLoS Genet* 2:e175
  161. Beranova M, Oliveira LM, Bédécarrats GY, Schipani E, Vallejo M, Ammini AC, Quintos JB, Hall JE, Martin KA, Hayes FJ, Pitteloud N, Kaiser UB, Crowley Jr WF, Seminara SB 2001 Prevalence, phenotypic spectrum, and modes of inheritance of gonadotropin-releasing hormone receptor mutations in idiopathic hypogonadotropic hypogonadism. *J Clin Endocrinol Metab* 86:1580–1588
  162. de Roux N, Young J, Misrahi M, Schaison G, Milgrom E 1999 Loss of function mutations of the GnRH receptor: a new cause of hypogonadotropic hypogonadism. *J Pediatr Endocrinol Metab* 12(Suppl 1):267–275
  163. Chan YM, Broder-Fingert S, Seminara SB 2009 Reproductive functions of kisspeptin and Gpr54 across the life cycle of mice and men. *Peptides* 30:42–48
  164. de Roux N, Genin E, Carel JC, Matsuda F, Chaussain JL, Milgrom E 2003 Hypogonadotropic hypogonadism due to loss of function of the KiSS1-derived peptide receptor GPR54. *Proc Natl Acad Sci USA* 100:10972–10976
  165. Seminara SB, Messenger S, Chatzidaki EE, Thresher RR, Acierno Jr JS, Shagoury JK, Bo-Abbas Y, Kuohung W, Schwinof KM, Hendrick AG, Zahn D, Dixon J, Kaiser UB, Slaugenhaupt SA, Gusella JF, O'Rahilly S, Carlton MB, Crowley Jr WF, Aparicio SA, Colledge WH 2003 The GPR54 gene as a regulator of puberty. *N Engl J Med* 349: 1614–1627
  166. Lapatto R, Pallais JC, Zhang D, Chan YM, Mahan A, Cerrato F, Le WW, Hoffman GE, Seminara SB 2007 Kiss1<sup>-/-</sup> mice exhibit more variable hypogonadism than Gpr54<sup>-/-</sup> mice. *Endocrinology* 148:4927–4936
  167. Main KM, Schmidt IM, Toppari J, Skakkebaek NE 2002 Early postnatal treatment of hypogonadotropic hypogonadism with recombinant human FSH and LH. *Eur J Endocrinol* 146:75–79
  168. Kaplan SL, Grumbach MM, Aubert ML 1976 The ontogenesis of pituitary hormones and hypothalamic factors in the human fetus: maturation of central nervous system regulation of anterior pituitary function. *Recent Prog Horm Res* 32:161–243
  169. Grumbach MM 2005 A window of opportunity: the diagnosis of gonadotropin deficiency in the male infant. *J Clin Endocrinol Metab* 90:3122–3127
  170. O'Shaughnessy PJ, Baker P, Sohnius U, Haavisto AM, Charlton HM, Huhtaniemi I 1998 Fetal development of Leydig cell activity in the mouse is independent of pituitary gonadotroph function. *Endocrinology* 139:1141–1146
  171. Cattanaach BM, Iddon CA, Charlton HM, Chiappa SA, Fink G 1977 Gonadotrophin-releasing hormone deficiency in a mutant mouse with hypogonadism. *Nature* 269: 338–340
  172. Pointis G, Latreille MT, Cedard L 1980 Gonado-pituitary relationships in the fetal mouse at various times during sexual differentiation. *J Endocrinol* 86:483–488
  173. Anakwe OO, Moger WH 1984 Ontogeny of rodent testicular androgen production in response to isoproterenol and luteinizing hormone in vitro. *Biol Reprod* 30:1142–1152

174. Funes S, Hedrick JA, Vassileva G, Markowitz L, Abbondanzo S, Golovko A, Yang S, Monsma FJ, Gustafson EL 2003 The KiSS-1 receptor GPR54 is essential for the development of the murine reproductive system. *Biochem Biophys Res Commun* 312:1357–1363
175. Kauffman AS, Park JH, McPhie-Lalmansingh AA, Gottsch ML, Bodo C, Hohmann JG, Pavlova MN, Rohde AD, Clifton DK, Steiner RA, Rissman EF 2007 The kisspeptin receptor GPR54 is required for sexual differentiation of the brain and behavior. *J Neurosci* 27:8826–8835
176. d'Anglemont de Tassigny X, Fagg LA, Dixon JP, Day K, Leitch HG, Hendrick AG, Zahn D, Franceschini I, Caraty A, Carlton MB, Aparicio SA, Colledge WH 2007 Hypogonadotropic hypogonadism in mice lacking a functional Kiss1 gene. *Proc Natl Acad Sci USA* 104:10714–10719
177. Lanfranco F, Gromoll J, von Eckardstein S, Herding EM, Nieschlag E, Simoni M 2005 Role of sequence variations of the GnRH receptor and G protein-coupled receptor 54 gene in male idiopathic hypogonadotropic hypogonadism. *Eur J Endocrinol* 153:845–852
178. Pask AJ, Kanasaki H, Kaiser UB, Conn PM, Janovick JA, Stockton DW, Hess DL, Justice MJ, Behringer RR 2005 A novel mouse model of hypogonadotropic hypogonadism: N-ethyl-N-nitrosourea-induced gonadotropin-releasing hormone receptor gene mutation. *Mol Endocrinol* 19:972–981
179. Welsh M, Sharpe RM, Walker M, Smith LB, Saunders PT 2009 New insights into the role of androgens in wolffian duct stabilization in male and female rodents. *Endocrinology* 150:2472–2480
180. Themmen APN, Huhtaniemi IT 2000 Mutations of gonadotropins and gonadotropin receptors: elucidating the physiology and pathophysiology of pituitary-gonadal function. *Endocr Rev* 21:551–583
181. Kendall SK, Samuelson LC, Saunders TL, Wood RI, Camper SA 1995 Targeted disruption of the pituitary glycoprotein hormone  $\alpha$ -subunit produces hypogonadal and hypothyroid mice. *Genes Dev* 9:2007–2019
182. Daly AF, Salvi R, Menage J, Thiry A, Pralong F, Gaillard R, Beckers A, Identification of a family harboring a novel LH  $\beta$ -subunit mutation associated with hypogonadism. Program of the 88th Annual Meeting of The Endocrine Society, Boston, June 24–27, 2006 (Abstract)
183. Lofrano-Porto A, Barra GB, Giacomini LA, Nascimento PP, Latronico AC, Casulari LA, da Rocha Neves Fde A 2007 Luteinizing hormone  $\beta$  mutation and hypogonadism in men and women. *N Engl J Med* 357:897–904
184. Valdes-Socin H, Salvi R, Daly AF, Gaillard RC, Quatresooz P, Tebeu PM, Pralong FP, Beckers A 2004 Hypogonadism in a patient with a mutation in the luteinizing hormone  $\beta$ -subunit gene. *N Engl J Med* 351:2619–2625
185. Weiss J, Axelrod L, Whitcomb RW, Harris PE, Crowley WF, Jameson JL 1992 Hypogonadism caused by a single amino acid substitution in the  $\beta$  subunit of luteinizing hormone. *N Engl J Med* 326:179–183
186. Ma X, Dong Y, Matzuk MM, Kumar TR 2004 Targeted disruption of luteinizing hormone  $\beta$ -subunit leads to hypogonadism, defects in gonadal steroidogenesis, and infertility. *Proc Natl Acad Sci USA* 101:17294–17299
187. Wu SM, Chan WY 1999 Male pseudohermaphroditism due to inactivating luteinizing hormone receptor mutations. *Arch Med Res* 30:495–500
188. el-Awady MK, Temtamy SA, Salam MA, Gad YZ 1987 Familial Leydig cell hypoplasia as a cause of male pseudohermaphroditism. *Hum Hered* 37:36–40
189. Kremer H, Kraaij R, Toledo SP, Post M, Fridman JB, Hayashida CY, van Reen M, Milgrom E, Ropers HH, Mariman E, Themmen AP, Brunner HG 1995 Male pseudohermaphroditism due to a homozygous missense mutation of the luteinizing hormone receptor gene. *Nat Genet* 9:160–164
190. Latronico AC 2000 Naturally occurring mutations of the luteinizing hormone receptor gene affecting reproduction. *Semin Reprod Med* 18:17–20
191. Huhtaniemi IT, Korenbrot CC, Jaffe RB 1977 HCG binding and stimulation of testosterone biosynthesis in the human fetal testis. *J Clin Endocrinol Metab* 44:963–967
192. Laue LL, Wu SM, Kudo M, Bourdony CJ, Cutler Jr GB, Hsueh AJ, Chan WY 1996 Compound heterozygous mutations of the luteinizing hormone receptor gene in Leydig cell hypoplasia. *Mol Endocrinol* 10:987–997
193. Welsh M, Saunders PT, Marchetti NI, Sharpe RM 2006 Androgen-dependent mechanisms of Wolffian duct development and their perturbation by flutamide. *Endocrinology* 147:4820–4830
194. Welsh M, Saunders PT, Sharpe RM 2007 The critical time window for androgen-dependent development of the Wolffian duct in the rat. *Endocrinology* 148:3185–3195
195. Lei ZM, Mishra S, Zou W, Xu B, Foltz M, Li X, Rao CV 2001 Targeted disruption of luteinizing hormone/human chorionic gonadotropin receptor gene. *Mol Endocrinol* 15:184–200
196. Zhang FP, Poutanen M, Wilbertz J, Huhtaniemi I 2001 Normal prenatal but arrested postnatal sexual development of luteinizing hormone receptor knockout (LuRKO) mice. *Mol Endocrinol* 15:172–183
197. Huhtaniemi I, Zhang FP, Kero J, Hämäläinen T, Poutanen M 2002 Transgenic and knockout mouse models for the study of luteinizing hormone and luteinizing hormone receptor function. *Mol Cell Endocrinol* 187:49–56
198. Gromoll J, Schulz A, Borta H, Gudermann T, Teerds KJ, Greschniok A, Nieschlag E, Seif FJ 2002 Homozygous mutation within the conserved Ala-Phe-Asn-Glu-Thr motif of exon 7 of the LH receptor causes male pseudohermaphroditism. *Eur J Endocrinol* 147:597–608
199. Meehan TP, Narayan P 2007 Constitutively active luteinizing hormone receptors: consequences of in vivo expression. *Mol Cell Endocrinol* 260–262:294–300
200. Flück CE, Pandey AV, Huang N, Agrawal V, Miller WL 2008 P450 oxidoreductase deficiency - a new form of congenital adrenal hyperplasia. *Endocr Dev* 13:67–81
201. Homma K, Hasegawa T, Nagai T, Adachi M, Horikawa R, Fujiwara I, Tajima T, Takeda R, Fukami M, Ogata T 2006 Urine steroid hormone profile analysis in cytochrome P450 oxidoreductase deficiency: implication for the backdoor pathway to dihydrotestosterone. *J Clin Endocrinol Metab* 91:2643–2649
202. Shen AL, O'Leary KA, Kasper CB 2002 Association of multiple developmental defects and embryonic lethality with loss of microsomal NADPH-cytochrome P450 oxidoreductase. *J Biol Chem* 277:6536–6541
203. Hall PF 1991 Cytochrome P-450 C21sc: one enzyme with two actions: hydroxylase and lyase. *J Steroid Biochem Mol Biol* 40:527–532
204. Fevold HR, Lorence MC, McCarthy JL, Trant JM,

- Kagimoto M, Waterman MR, Mason JI 1989 Rat P450(17 $\alpha$ ) from testis: characterization of a full-length cDNA encoding a unique steroid hydroxylase capable of catalyzing both  $\Delta$  4- and  $\Delta$  5-steroid-17,20-lyase reactions. *Mol Endocrinol* 3:968–975
205. Rainey WE, Carr BR, Sasano H, Suzuki T, Mason JI 2002 Dissecting human adrenal androgen production. *Trends Endocrinol Metab* 13:234–239
206. Auchus RJ 2004 The backdoor pathway to dihydrotestosterone. *Trends Endocrinol Metab* 15:432–438
207. Arlt W, Walker EA, Draper N, Ivison HE, Ride JP, Hammer F, Chalder SM, Borucka-Mankiewicz M, Hauffa BP, Malunowicz EM, Stewart PM, Shackleton CH 2004 Congenital adrenal hyperplasia caused by mutant P450 oxidoreductase and human androgen synthesis: analytical study. *Lancet* 363:2128–2135
208. Flück CE, Tajima T, Pandey AV, Arlt W, Okuhara K, Verge CF, Jabs EW, Mendonça BB, Fujieda K, Miller WL 2004 Mutant P450 oxidoreductase causes disordered steroidogenesis with and without Antley-Bixler syndrome. *Nat Genet* 36:228–230
209. Fukami M, Horikawa R, Nagai T, Tanaka T, Naiki Y, Sato N, Okuyama T, Nakai H, Soneda S, Tachibana K, Matsuo N, Sato S, Homma K, Nishimura G, Hasegawa T, Ogata T 2005 Cytochrome P450 oxidoreductase gene mutations and Antley-Bixler syndrome with abnormal genitalia and/or impaired steroidogenesis: molecular and clinical studies in 10 patients. *J Clin Endocrinol Metab* 90:414–426
210. Grumbach MM, Auchus RJ 1999 Estrogen: consequences and implications of human mutations in synthesis and action. *J Clin Endocrinol Metab* 84:4677–4694
211. Shackleton C, Marcos J, Arlt W, Hauffa BP 2004 Prenatal diagnosis of P450 oxidoreductase deficiency (ORD): a disorder causing low pregnancy estriol, maternal and fetal virilization, and the Antley-Bixler syndrome phenotype. *Am J Med Genet A* 129A:105–112
212. Wilson JD, Auchus RJ, Leihy MW, Guryev OL, Estabrook RW, Osborn SM, Shaw G, Renfree MB 2003 5 $\alpha$ -Androstane-3 $\alpha$ ,17 $\beta$ -diol is formed in tammar wallaby pouch young testes by a pathway involving 5 $\alpha$ -pregnane-3 $\alpha$ ,17 $\alpha$ -diol-20-one as a key intermediate. *Endocrinology* 144:575–580
213. Mahendroo M, Wilson JD, Richardson JA, Auchus RJ 2004 Steroid 5 $\alpha$ -reductase 1 promotes 5 $\alpha$ -androstane-3 $\alpha$ ,17 $\beta$ -diol synthesis in immature mouse testes by two pathways. *Mol Cell Endocrinol* 222:113–120
214. Ge RS, Hardy DO, Catterall JF, Hardy MP 1999 Opposing changes in 3 $\alpha$ -hydroxysteroid dehydrogenase oxidative and reductive activities in rat leydig cells during pubertal development. *Biol Reprod* 60:855–860
215. Gupta MK, Guryev OL, Auchus RJ 2003 5 $\alpha$ -Reduced C21 steroids are substrates for human cytochrome P450c17. *Arch Biochem Biophys* 418:151–160
216. Imperato-McGinley J, Zhu YS 2002 Androgens and male physiology: the syndrome of 5 $\alpha$ -reductase-2 deficiency. *Mol Cell Endocrinol* 198:51–59
217. Mahendroo MS, Cala KM, Hess DL, Russell DW 2001 Unexpected virilization in male mice lacking steroid 5 $\alpha$ -reductase enzymes. *Endocrinology* 142:4652–4662
218. Imperato-McGinley J, Sanchez RS, Spencer JR, Yee B, Vaughan ED 1992 Comparison of the effects of the 5 $\alpha$ -reductase inhibitor finasteride and the antiandrogen flutamide on prostate and genital differentiation: dose-response studies. *Endocrinology* 131:1149–1156
219. Wilson VS, Blystone CR, Hotchkiss AK, Rider CV, Gray Jr LE 2008 Diverse mechanisms of anti-androgen action: impact on male rat reproductive tract development. *Int J Androl* 31:178–187
220. Sharpe RM 2008 “Additional” effects of phthalate mixtures on fetal testosterone production. *Toxicol Sci* 105:1–4
221. Main KM, Jensen RB, Asklund C, Hoi-Hansen CE, Skakkebaek NE 2006 Low birth weight and male reproductive function. *Horm Res* 65(Suppl 3):116–122
222. Plagemann A, Harder T, Dudenhausen JW 2008 The diabetic pregnancy, macrosomia, and perinatal nutritional programming. *Nestle Nutr Workshop Ser Pediatr Program* 61:91–102
223. Seckl JR, Holmes MC 2007 Mechanisms of disease: glucocorticoids, their placental metabolism and fetal ‘programming’ of adult pathophysiology. *Nat Clin Pract Endocrinol Metab* 3:479–488
224. Ikeno N, Takahashi K 1985 [Studies on changes in serum estrone, estradiol, estriol, DHA-S, and cortisol and urinary estriol excretion]. *Nippon Sanka Fujinka Gakkai Zasshi* 37:99–106
225. Rivas A, Fisher JS, McKinnell C, Atanassova N, Sharpe RM 2002 Induction of reproductive tract developmental abnormalities in the male rat by lowering androgen production or action in combination with a low dose of diethylstilbestrol: evidence for importance of the androgen-estrogen balance. *Endocrinology* 143:4797–4808
226. Auricchio F, Migliaccio A, Castoria G 2008 Sex-steroid hormones and EGF signalling in breast and prostate cancer cells: targeting the association of Src with steroid receptors. *Steroids* 73:880–884
227. Kousteni S, Bellido T, Plotkin LI, O’Brien CA, Bodenner DL, Han L, Han K, DiGregorio GB, Katzenellenbogen JA, Katzenellenbogen BS, Roberson PK, Weinstein RS, Jilka RL, Manolagas SC 2001 Nongenotropic, sex-nonspecific signaling through the estrogen or androgen receptors: dissociation from transcriptional activity. *Cell* 104:719–730
228. Migliaccio A, Castoria G, Di Domenico M, de Falco A, Bilancio A, Lombardi M, Barone MV, Ametrano D, Zannini MS, Abbondanza C, Auricchio F 2000 Steroid-induced androgen receptor-oestradiol receptor  $\beta$ -Src complex triggers prostate cancer cell proliferation. *EMBO J* 19:5406–5417
229. Tulchinsky D, Hobel CJ, Yeager E, Marshall JR 1972 Plasma estrone, estradiol, estriol, progesterone, and 17-hydroxyprogesterone in human pregnancy. I. Normal pregnancy. *Am J Obstet Gynecol* 112:1095–1100
230. Tulchinsky D, Hobel CJ 1973 Plasma human chorionic gonadotropin, estrone, estradiol, estriol, progesterone, and 17  $\alpha$ -hydroxyprogesterone in human pregnancy. 3. Early normal pregnancy. *Am J Obstet Gynecol* 117:884–893
231. Kellokumpu-Lehtinen P, Pelliniemi LJ, Pulkkinen MO, Schweikert HU 1991 Androgen synthesis in human fetal testis exposed in utero to a combination of norethindrone acetate and ethinyl estradiol. *Horm Res* 35:242–245
232. Klip H, Verloop J, van Gool JD, Koster ME, Burger CW, van Leeuwen FE 2002 Hypospadias in sons of women ex-

- posed to diethylstilbestrol in utero: a cohort study. *Lancet* 359:1102–1107
233. Palmer JR, Wise LA, Robboy SJ, Titus-Ernstoff L, Noller KL, Herbst AL, Troisi R, Hoover RN 2005 Hypospadias in sons of women exposed to diethylstilbestrol in utero. *Epidemiology* 16:583–586
  234. Veurink M, Koster M, Berg LT 2005 The history of DES, lessons to be learned. *Pharm World Sci* 27:139–143
  235. Whitehead ED, Leiter E 1981 Genital abnormalities and abnormal semen analyses in male patients exposed to diethylstilbestrol in utero. *J Urol* 125:47–50
  236. Schwartz RH, Jaffe SJ 1980 Drugs and chemical risks to the fetus and newborn. New York: Alan Liss
  237. Wilcox AJ, Baird DD, Weinberg CR, Hornsby PP, Herbst AL 1995 Fertility in men exposed prenatally to diethylstilbestrol. *N Engl J Med* 332:1411–1416
  238. Carmichael SL, Shaw GM, Laurent C, Croughan MS, Olney RS, Lammer EJ 2005 Maternal progestin intake and risk of hypospadias. *Arch Pediatr Adolesc Med* 159:957–962
  239. Stillman RJ 1982 In utero exposure to diethylstilbestrol: adverse effects on the reproductive tract and reproductive performance and male and female offspring. *Am J Obstet Gynecol* 142:905–921
  240. Thomas HV, Murphy MF, Key TJ, Fentiman IS, Allen DS, Kinlen LJ 1998 Pregnancy and menstrual hormone levels in mothers of twins compared to mothers of singletons. *Ann Hum Biol* 25:69–75
  241. Martin OV, Shialis T, Lester JN, Scrimshaw MD, Boobis AR, Voulvoulis N 2008 Testicular dysgenesis syndrome and the estrogen hypothesis: a quantitative meta-analysis. *Environ Health Perspect* 116:149–157
  242. Raman-Wilms L, Tseng AL, Wighardt S, Einarson TR, Koren G 1995 Fetal genital effects of first-trimester sex hormone exposure: a meta-analysis. *Obstet Gynecol* 85:141–149
  243. Storgaard L, Bonde JP, Olsen J 2006 Male reproductive disorders in humans and prenatal indicators of estrogen exposure. A review of published epidemiological studies. *Reprod Toxicol* 21:4–15
  244. Boukari K, Ciampi ML, Guiochon-Mantel A, Young J, Lombès M, Meduri G 2007 Human fetal testis: source of estrogen and target of estrogen action. *Hum Reprod* 22:1885–1892
  245. Gaskell TL, Robinson LL, Groome NP, Anderson RA, Saunders PT 2003 Differential expression of two estrogen receptor  $\beta$  isoforms in the human fetal testis during the second trimester of pregnancy. *J Clin Endocrinol Metab* 88:424–432
  246. Guyot R, Odet F, Leduque P, Forest MG, Le Magueresse-Battistoni B 2004 Diethylstilbestrol inhibits the expression of the steroidogenic acute regulatory protein in mouse fetal testis. *Mol Cell Endocrinol* 220:67–75
  247. Haavisto T, Nurmela K, Pohjanvirta R, Huuskonen H, El-Ghani F, Paranko J 2001 Prenatal testosterone and luteinizing hormone levels in male rats exposed during pregnancy to 2,3,7,8-tetrachlorodibenzo-p-dioxin and diethylstilbestrol. *Mol Cell Endocrinol* 178:169–179
  248. Lasserguère J, Livera G, Habert R, Jégou B 2003 Time- and dose-related effects of estradiol and diethylstilbestrol on the morphology and function of the fetal rat testis in culture. *Toxicol Sci* 73:160–169
  249. Kim KS, Torres Jr CR, Yucel S, Raimondo K, Cunha GR, Baskin LS 2004 Induction of hypospadias in a murine model by maternal exposure to synthetic estrogens. *Environ Res* 94:267–275
  250. Willingham E, Baskin LS 2007 Candidate genes and their response to environmental agents in the etiology of hypospadias. *Nat Clin Pract Urol* 4:270–279
  251. Delbès G, Levacher C, Habert R 2006 Estrogen effects on fetal and neonatal testicular development. *Reproduction* 132:527–538
  252. Cederroth CR, Schaad O, Descombes P, Chambon P, Vassalli JD, Nef S 2007 Estrogen receptor  $\alpha$  is a major contributor to estrogen-mediated fetal testis dysgenesis and cryptorchidism. *Endocrinology* 148:5507–5519
  253. Saunders PT, Majdic G, Parte P, Millar MR, Fisher JS, Turner KJ, Sharpe RM 1997 Fetal and perinatal influence of xenoestrogens on testis gene expression. *Adv Exp Med Biol* 424:99–110
  254. Delbès G, Levacher C, Duquenne C, Racine C, Pakarinen P, Habert R 2005 Endogenous estrogens inhibit mouse fetal Leydig cell development via estrogen receptor  $\alpha$ . *Endocrinology* 146:2454–2461
  255. Fisher JS, Millar MR, Majdic G, Saunders PT, Fraser HM, Sharpe RM 1997 Immunolocalisation of oestrogen receptor- $\alpha$  within the testis and excurrent ducts of the rat and marmoset monkey from perinatal life to adulthood. *J Endocrinol* 153:485–495
  256. O'Donnell L, Robertson KM, Jones ME, Simpson ER 2001 Estrogen and spermatogenesis. *Endocr Rev* 22:289–318
  257. Behrens GH, Petersen PM, Grotmol T, Sørensen DR, Torjesen P, Tretli S, Haugen TB 2000 Reproductive function in male rats after brief in utero exposure to diethylstilboestrol. *Int J Androl* 23:366–371
  258. McKinnell C, Atanassova N, Williams K, Fisher JS, Walker M, Turner KJ, Saunders TK, Sharpe RM 2001 Suppression of androgen action and the induction of gross abnormalities of the reproductive tract in male rats treated neonatally with diethylstilbestrol. *J Androl* 22:323–338
  259. Blaschko SD, Willingham EJ, Baskin LS 2006 Embryonic exposure to low-dose  $17\beta$ -estradiol decreases fetal mass sex specifically in male mice and does not cause hypospadias. *J Invest Med* 54:490–495
  260. Hardy MP, Gao HB, Dong Q, Ge R, Wang Q, Chai WR, Feng X, Sottas C 2005 Stress hormone and male reproductive function. *Cell Tissue Res* 322:147–153
  261. Carmichael SL, Ma C, Werler MM, Olney RS, Shaw GM 2009 Maternal corticosteroid use and hypospadias. *J Pediatr* 155:39–44
  262. Goto M, Piper Hanley K, Marcos J, Wood PJ, Wright S, Postle AD, Cameron IT, Mason JI, Wilson DI, Hanley NA 2006 In humans, early cortisol biosynthesis provides a mechanism to safeguard female sexual development. *J Clin Invest* 116:953–960
  263. Michael AE, Papageorgiou AT 2008 Potential significance of physiological and pharmacological glucocorticoids in early pregnancy. *Hum Reprod Update* 14:497–517
  264. Huhtaniemi I, Koivisto M, Pakarinen A, Tuimala R, Kauppila A 1982 Pituitary-adrenal and testicular function in preterm infants after prenatal dexamethasone treatment. *Acta Paediatr Scand* 71:425–429
  265. Gitau R, Adams D, Fisk NM, Glover V 2005 Fetal plasma

- testosterone correlates positively with cortisol. Arch Dis Child Fetal Neonatal Ed 90:F166–F169
266. Sarkar P, Bergman K, Fisk NM, O'Connor TG, Glover V 2007 Amniotic fluid testosterone: relationship with cortisol and gestational age. Clin Endocrinol (Oxf) 67:743–747
267. Cumming DC, Quigley ME, Yen SS 1983 Acute suppression of circulating testosterone levels by cortisol in men. J Clin Endocrinol Metab 57:671–673
268. Doerr P, Pirke KM 1976 Cortisol-induced suppression of plasma testosterone in normal adult males. J Clin Endocrinol Metab 43:622–629
269. Schaison G, Durand F, Mowszowicz I 1978 Effect of glucocorticoids on plasma testosterone in men. Acta Endocrinol (Copenh) 89:126–131
270. MacAdams MR, White RH, Chipps BE 1986 Reduction of serum testosterone levels during chronic glucocorticoid therapy. Ann Intern Med 104:648–651
271. Gabilove JL, Nicolis GL, Sohval AR 1974 The testis in Cushing's syndrome. J Urol 112:95–99
272. Smals AG, Kloppenborg PW, Benraad TJ 1977 Plasma testosterone profiles in Cushing's syndrome. J Clin Endocrinol Metab 45:240–245
273. Vierhapper H, Nowotny P, Waldhäusl W 2000 Production rates of testosterone in patients with Cushing's syndrome. Metabolism 49:229–231
274. Scott HM 2007 The role of androgens in testicular development and dysgenesis. PhD thesis, University of Edinburgh
275. Holson RR, Gough B, Sullivan P, Badger T, Sheehan DM 1995 Prenatal dexamethasone or stress but not ACTH or corticosterone alter sexual behavior in male rats. Neurotoxicol Teratol 17:393–401
276. Lalau JD, Aubert ML, Carmignac DF, Grégoire I, Dupouy JP 1990 Reduction in testicular function in rats. II. Reduction by dexamethasone in fetal and neonatal rats. Neuroendocrinology 51:289–293
277. O'Shaughnessy PJ, Fleming LM, Jackson G, Hochgeschwender U, Reed P, Baker PJ 2003 Adrenocorticotrophic hormone directly stimulates testosterone production by the fetal and neonatal mouse testis. Endocrinology 144:3279–3284
278. Bambino TH, Hsueh AJ 1981 Direct inhibitory effect of glucocorticoids upon testicular luteinizing hormone receptor and steroidogenesis *in vivo* and *in vitro*. Endocrinology 108:2142–2148
279. Saez JM, Morera AM, Haour F, Evain D 1977 Effects of *in vivo* administration of dexamethasone, corticotropin and human chorionic gonadotropin on steroidogenesis and protein and DNA synthesis of testicular interstitial cells in prepubertal rats. Endocrinology 101:1256–1263
280. Kim P, Hedman M, de la Torre B, Diczfalussy E 1985 Intratesticular steroid levels and their hormonal control. Steroids 45:235–245
281. Dong Q, Salva A, Sottas CM, Niu E, Holmes M, Hardy MP 2004 Rapid glucocorticoid mediation of suppressed testosterone biosynthesis in male mice subjected to immobilization stress. J Androl 25:973–981
282. Orr TE, Taylor MF, Bhattacharyya AK, Collins DC, Mann DR 1994 Acute immobilization stress disrupts testicular steroidogenesis in adult male rats by inhibiting the activities of 17  $\alpha$ -hydroxylase and 17,20-lyase without affecting the binding of LH/hCG receptors. J Androl 15:302–308
283. Welsh Jr TH, Bambino TH, Hsueh AJ 1982 Mechanism of glucocorticoid-induced suppression of testicular androgen biosynthesis *in vitro*. Biol Reprod 27:1138–1146
284. Agular BM, Vinggaard AM, Vind C 1992 Regulation by dexamethasone of the 3  $\beta$ -hydroxysteroid dehydrogenase activity in adult rat Leydig cells. J Steroid Biochem Mol Biol 43:565–571
285. Badrinarayanan R, Rengarajan S, Nithya P, Balasubramanian K 2006 Corticosterone impairs the mRNA expression and activity of 3 $\beta$ - and 17 $\beta$ -hydroxysteroid dehydrogenases in adult rat Leydig cells. Biochem Cell Biol 84:745–754
286. Martin LJ, Tremblay JJ 2008 Glucocorticoids antagonize cAMP-induced Star transcription in Leydig cells through the orphan nuclear receptor NR4A1. J Mol Endocrinol 41:165–175
287. Wang XJ, Dyson MT, Mondillo C, Patrignani Z, Pignataro O, Stocco DM 2002 Interaction between arachidonic acid and cAMP signaling pathways enhances steroidogenesis and Star gene expression in MA-10 Leydig tumor cells. Mol Cell Endocrinol 188:55–63
288. Monder C 1991 Corticosteroids, receptors, and the organ-specific functions of 11  $\beta$ -hydroxysteroid dehydrogenase. FASEB J 5:3047–3054
289. Hardy MP, Ganjam VK 1997 Stress, 11 $\beta$ -HSD, and Leydig cell function. J Androl 18:475–479
290. Phillips DM, Lakshmi V, Monder C 1989 Corticosteroid 11  $\beta$ -dehydrogenase in rat testis. Endocrinology 125:209–216
291. Drake AJ, Walker BR, Seckl JR 2005 Intergenerational consequences of fetal programming by in utero exposure to glucocorticoids in rats. Am J Physiol Regul Integr Comp Physiol 288:R34–R38
292. Derosa G, Salvadeo SA 2008 Pioglitazone and rosiglitazone: effects of treatment with a thiazolidinedione on lipids and non conventional cardiovascular risk factors. Curr Clin Pharmacol 3:77–84
293. Lebovitz HE, Banerji MA 2001 Insulin resistance and its treatment by thiazolidinediones. Recent Prog Horm Res 56:265–294
294. Arlt W, Auchus RJ, Miller WL 2001 Thiazolidinediones but not metformin directly inhibit the steroidogenic enzymes P450c17 and 3 $\beta$ -hydroxysteroid dehydrogenase. J Biol Chem 276:16767–16771
295. Kempná P, Hofer G, Mullis PE, Flück CE 2007 Pioglitazone inhibits androgen production in NCI-H295R cells by regulating gene expression of CYP17 and HSD3B2. Mol Pharmacol 71:787–798
296. Vierhapper H, Nowotny P, Waldhäusl W 2003 Reduced production rates of testosterone and dihydrotestosterone in healthy men treated with rosiglitazone. Metabolism 52:230–232
297. Lehmann JM, Moore LB, Smith-Oliver TA, Wilkison WO, Willson TM, Kliewer SA 1995 An antidiabetic thiazolidinedione is a high affinity ligand for peroxisome proliferator-activated receptor  $\gamma$  (PPAR  $\gamma$ ). J Biol Chem 270:12953–12956
298. Bility MT, Thompson JT, McKee RH, David RM, Butala JH, Vanden Heuvel JP, Peters JM 2004 Activation of mouse and human peroxisome proliferator-activated receptors (PPARs) by phthalate monoesters. Toxicol Sci 82:170–182
299. Chan LY, Yeung JH, Lau TK 2005 Placental transfer of

- rosiglitazone in the first trimester of human pregnancy. *Fertil Steril* 83:955–958
300. Dunaif A, Scott D, Finegood D, Quintana B, Whitcomb R 1996 The insulin-sensitizing agent troglitazone improves metabolic and reproductive abnormalities in the polycystic ovary syndrome. *J Clin Endocrinol Metab* 81:3299–3306
  301. Azziz R, Ehrmann D, Legro RS, Whitcomb RW, Hanley R, Fereshetian AG, O'Keefe M, Ghazzi MN 2001 Troglitazone improves ovulation and hirsutism in the polycystic ovary syndrome: a multicenter, double blind, placebo-controlled trial. *J Clin Endocrinol Metab* 86:1626–1632
  302. Dereli D, Dereli T, Bayraktar F, Ozgen AG, Yilmaz C 2005 Endocrine and metabolic effects of rosiglitazone in non-obese women with polycystic ovary disease. *Endocr J* 52:299–308
  303. Yilmaz M, Biri A, Karakoç A, Törüner F, Bingöl B, Cakir N, Tiras B, Ayvaz G, Arslan M 2005 The effects of rosiglitazone and metformin on insulin resistance and serum androgen levels in obese and lean patients with polycystic ovary syndrome. *J Endocrinol Invest* 28:1003–1008
  304. Haddad GF, Jodicke C, Thomas MA, Williams DB, Aubuchon M 2008 Case series of rosiglitazone used during the first trimester of pregnancy. *Reprod Toxicol* 26:183–184
  305. Choi JS, Han JY, Ahn HK, Shin JS, Yang JH, Koong MK, Nava-Ocampo AA 2006 Exposure to rosiglitazone and fluoxetine in the first trimester of pregnancy. *Diabetes Care* 29:2176
  306. Yaris F, Yaris E, Kadioglu M, Ulku C, Kesim M, Kalyoncu NI 2004 Normal pregnancy outcome following inadvertent exposure to rosiglitazone, gliclazide, and atorvastatin in a diabetic and hypertensive woman. *Reprod Toxicol* 18:619–621
  307. Kalyoncu NI, Yaris F, Ulku C, Kadioglu M, Kesim M, Unsal M, Dikici M, Yaris E 2005 A case of rosiglitazone exposure in the second trimester of pregnancy. *Reprod Toxicol* 19:563–564
  308. Kapoor D, Channer KS, Jones TH 2008 Rosiglitazone increases bioactive testosterone and reduces waist circumference in hypogonadal men with type 2 diabetes. *Diab Vasc Dis Res* 5:135–137
  309. Kapoor D, Aldred H, Clark S, Channer KS, Jones TH 2007 Clinical and biochemical assessment of hypogonadism in men with type 2 diabetes: correlations with bioavailable testosterone and visceral adiposity. *Diabetes Care* 30:911–917
  310. Simon D, Charles MA, Nahoul K, Orssaud G, Kremiski J, Hully V, Joubert E, Papoz L, Eschwege E 1997 Association between plasma total testosterone and cardiovascular risk factors in healthy adult men: the Telecom study. *J Clin Endocrinol Metab* 82:682–685
  311. Martin SS, Qasim A, Reilly MP 2008 Leptin resistance: a possible interface of inflammation and metabolism in obesity-related cardiovascular disease. *J Am Coll Cardiol* 52:1201–1210
  312. Tena-Sempere M, Manna PR, Zhang FP, Pinilla L, González LC, Diéguez C, Huhtaniemi I, Aguilar E 2001 Molecular mechanisms of leptin action in adult rat testis: potential targets for leptin-induced inhibition of steroidogenesis and pattern of leptin receptor messenger ribonucleic acid expression. *J Endocrinol* 170:413–423
  313. Elbrecht A, Chen Y, Cullinan CA, Hayes N, Leibowitz M, Moller DE, Berger J 1996 Molecular cloning, expression and characterization of human peroxisome proliferator activated receptors  $\gamma$  1 and  $\gamma$  2. *Biochem Biophys Res Commun* 224:431–437
  314. Corton JC, Lapinskas PJ 2005 Peroxisome proliferator-activated receptors: mediators of phthalate ester-induced effects in the male reproductive tract? *Toxicol Sci* 83:4–17
  315. Boberg J, Metzдорff S, Wortziger R, Axelstad M, Brokken L, Vinggaard AM, Dalgaard M, Nellemann C 2008 Impact of diisobutyl phthalate and other PPAR agonists on steroidogenesis and plasma insulin and leptin levels in fetal rats. *Toxicology* 250:75–81
  316. Bhasin S, Swerdloff RS 1986 Mechanisms of gonadotropin-releasing hormone agonist action in the human male. *Endocr Rev* 7:106–114
  317. Clayton RN, Huhtaniemi IT 1982 Absence of gonadotropin-releasing hormone receptors in human gonadal tissue. *Nature* 299:56–59
  318. Bahk JY, Hyun JS, Chung SH, Lee H, Kim MO, Lee BH, Choi WS 1995 Stage specific identification of the expression of GnRH mRNA and localization of the GnRH receptor in mature rat and adult human testis. *J Urol* 154:1958–1961
  319. Dong KW, Yu KL, Roberts JL 1993 Identification of a major up-stream transcription start site for the human gonadotropin-releasing hormone gene used in reproductive tissues and cell lines. *Mol Endocrinol* 7:1654–1666
  320. Schaison G, Brailly S, Vuagnat P, Bouchard P, Milgrom E 1984 Absence of a direct inhibitory effect of the gonadotropin-releasing hormone (GnRH) agonist D-Ser (TBU)6, des-Gly-NH2(10) GnRH ethylamide (Buserelin) on testicular steroidogenesis in men. *J Clin Endocrinol Metab* 58:885–888
  321. Namiki M, Nonomura N, Nakamura M, Okuyama A, Sonoda T, Nishimune Y, Matsumoto K 1987 Effects of a gonadotropin-releasing hormone agonist analog (ICI 118630) on endocrine functions of human testis in vivo and in vitro. *Fertil Steril* 48:1012–1017
  322. Mann DR, Adams SR, Gould KG, Orr TE, Collins DC 1989 Evaluation of the possible direct effects of gonadotrophin-releasing hormone analogues on the monkey (*Macaca mulatta*) testis. *J Reprod Fertil* 85:89–95
  323. Sundaram K, Thau RB, Goldstein M, Phillips DM, Rivier J, Vale W, Bardin CW 1984 Effect of an LHRH agonist on pituitary and testicular function in rhesus monkeys. *J Reprod Fertil* 72:365–371
  324. Vicari E, Mongioi A, Recupero D, Coniglione F, Macchi M, Sipione C, Calogero A, D'Agata R 1986 Failure of GnRH analogue to inhibit serum concentrations of testosterone and 17  $\alpha$ -hydroxyprogesterone in hCG-substituted hypogonadotropic hypogonadism. *Acta Endocrinol (Copenh)* 113:305–310
  325. Botté MC, Chamagne AM, Carré MC, Counis R, Kottler ML 1998 Fetal expression of GnRH and GnRH receptor genes in rat testis and ovary. *J Endocrinol* 159:179–189
  326. Huhtaniemi IT, Catt KJ, Clayton RN 1985 Newborn and immature rat testes contain gonadotropin-releasing hormone (GnRH) receptors, and their testosterone production is stimulated by a GnRH agonist in vitro. *Mol Cell Endocrinol* 40:41–44
  327. Clayton RN, Catt KJ 1981 Gonadotropin-releasing hormone receptors: characterization, physiological regula-

- tion, and relationship to reproductive function. *Endocr Rev* 2:186–209
328. Habert R, Devif I, Gangnerau MN, Lecerf L 1991 Ontogenesis of the in vitro response of rat testis to gonadotropin-releasing hormone. *Mol Cell Endocrinol* 82:199–206
  329. Hunter MG, Sullivan MH, Dix CJ, Aldred LF, Cooke BA 1982 Stimulation and inhibition by LHRH analogues of cultured rat Leydig cell function and lack of effect on mouse Leydig cells. *Mol Cell Endocrinol* 27:31–44
  330. Dufau ML, Knox GF 1985 Fetal Leydig cell culture—an in vitro system for the study of trophic hormone and GnRH receptors and actions. *J Steroid Biochem* 23:743–755
  331. Dufau ML, Warren DW, Knox GF, Loumaye E, Castellon ML, Luna S, Catt KJ 1984 Receptors and inhibitory actions of gonadotropin-releasing hormone in the fetal Leydig cell. *J Biol Chem* 259:2896–2899
  332. Hsueh AJ, Bambino TH, Zhuang LZ, Welsh Jr TH, Ling NC 1983 Mechanism of the direct action of gonadotropin-releasing hormone and its antagonist on androgen biosynthesis by cultured rat testicular cells. *Endocrinology* 112:1653–1661
  333. Habert R 1992 Effect of decapitation and chronic in-vivo treatment with a gonadotrophin-releasing hormone agonist on testicular steroidogenesis in the rat fetus. *J Endocrinol* 133:245–251
  334. Bambino TH, Schreiber JR, Hsueh AJ 1980 Gonadotropin-releasing hormone and its agonist inhibit testicular luteinizing hormone receptor and steroidogenesis in immature and adult hypophysectomized rats. *Endocrinology* 107:908–917
  335. Wang NG, Sundaram K, Pavlou S, Rivier J, Vale W, Bardin CW 1983 Mice are insensitive to the antitesticular effects of luteinizing hormone-releasing hormone agonists. *Endocrinology* 112:331–335
  336. Pointis G, Latreille MT 1986 Absence of LHRH effect on testosterone production by Leydig cells from fetal mouse testis. *J Steroid Biochem* 24:307–310
  337. Iwasaki K, Fujii A, Arimura A, Groot K 1989 Suppression of testicular activity by a GnRH agonist in hypophysectomized, gonadotropin-treated mice. *Tokai J Exp Clin Med* 14:25–28
  338. Van den Bossche H, Willemsens G, Cools W, Cornelissen F, Lauwers WF, van Cutsem JM 1980 In vitro and in vivo effects of the antimycotic drug ketoconazole on sterol synthesis. *Antimicrob Agents Chemother* 17:922–928
  339. Pont A, Williams PL, Azhar S, Reitz RE, Bochra C, Smith ER, Stevens DA 1982 Ketoconazole blocks testosterone synthesis. *Arch Intern Med* 142:2137–2140
  340. Pont A, Williams PL, Loose DS, Feldman D, Reitz RE, Bochra C, Stevens DA 1982 Ketoconazole blocks adrenal steroid synthesis. *Ann Intern Med* 97:370–372
  341. Schürmeyer T, Nieschlag E 1984 Effect of ketoconazole and other imidazole fungicides on testosterone biosynthesis. *Acta Endocrinol (Copenh)* 105:275–280
  342. Moudgal VV, Sobel JD 2003 Antifungal drugs in pregnancy: a review. *Expert Opin Drug Saf* 2:475–483
  343. De Coster R, Coene MC, Van Camp C, Van Camp K, Beerens D, Cools W 1989 Comparative effects of ketoconazole on rat, dog and human testicular steroidogenesis. *J Enzyme Inhib* 2:261–268
  344. Sikka SC, Swerdloff RS, Rajfer J 1985 *In vitro* inhibition of testosterone biosynthesis by ketoconazole. *Endocrinology* 116:1920–1925
  345. Rajfer J, Sikka SC, Rivera F, Handelsman DJ 1986 Mechanism of inhibition of human testicular steroidogenesis by oral ketoconazole. *J Clin Endocrinol Metab* 63:1193–1198
  346. Engelhardt D, Weber MM 1994 Therapy of Cushing's syndrome with steroid biosynthesis inhibitors. *J Steroid Biochem Mol Biol* 49:261–267
  347. Amado JA, Pesquera C, Gonzalez EM, Otero M, Freijanes J, Alvarez A 1990 Successful treatment with ketoconazole of Cushing's syndrome in pregnancy. *Postgrad Med J* 66:221–223
  348. Berwaerts J, Verhelst J, Mahler C, Abs R 1999 Cushing's syndrome in pregnancy treated by ketoconazole: case report and review of the literature. *Gynecol Endocrinol* 13:175–182
  349. Kazy Z, Puhó E, Czeizel AE 2005 Population-based case-control study of oral ketoconazole treatment for birth outcomes. *Congenit Anom (Kyoto)* 45:5–8
  350. Hallmark N, Walker M, McKinnell C, Mahood IK, Scott H, Bayne R, Coutts S, Anderson RA, Greig I, Morris K, Sharpe RM 2007 Effects of monobutyl and di(n-butyl) phthalate in vitro on steroidogenesis and Leydig cell aggregation in fetal testis explants from the rat: comparison with effects in vivo in the fetal rat and neonatal marmoset and in vitro in the human. *Environ Health Perspect* 115:390–396
  351. Gray Jr LE, Wolf C, Lambright C, Mann P, Price M, Cooper RL, Ostby J 1999 Administration of potentially antiandrogenic pesticides (procymidone, linuron, iprodione, chlozolinate, p,p'-DDE, and ketoconazole) and toxic substances (dibutyl- and diethylhexyl phthalate, PCB 169, and ethane dimethane sulphonate) during sexual differentiation produces diverse profiles of reproductive malformations in the male rat. *Toxicol Ind Health* 15:94–118
  352. Taxvig C, Vinggaard AM, Hass U, Axelstad M, Metzdorff S, Nellemann C 2008 Endocrine-disrupting properties in vivo of widely used azole fungicides. *Int J Androl* 31:170–177
  353. De Coster R, Beerens D, Dom J, Willemsens G 1984 Endocrinological effects of single daily ketoconazole administration in male beagle dogs. *Acta Endocrinol (Copenh)* 107:275–281
  354. Willard MD, Nachreiner R, McDonald R, Roudabush P 1986 Ketoconazole-induced changes in selected canine hormone concentrations. *Am J Vet Res* 47:2504–2509
  355. Vawda AI, Davies AG 1986 An investigation into the effects of ketoconazole on testicular function in Wistar rats. *Acta Endocrinol (Copenh)* 111:246–251
  356. Higashi Y, Omura M, Suzuki K, Inano H, Oshima H 1987 Ketoconazole as a possible universal inhibitor of cytochrome P-450 dependent enzymes: its mode of inhibition. *Endocrinol Jpn* 34:105–115
  357. Maertens JA 2004 History of the development of azole derivatives. *Clin Microbiol Infect* 10(Suppl 1):1–10
  358. White TC, Marr KA, Bowden RA 1998 Clinical, cellular, and molecular factors that contribute to antifungal drug resistance. *Clin Microbiol Rev* 11:382–402
  359. Hecker M, Newsted JL, Murphy MB, Higley EB, Jones PD, Wu R, Giesy JP 2006 Human adrenocarcinoma (H295R) cells for rapid in vitro determination of effects on steroidogenesis.

- dogeneis: hormone production. *Toxicol Appl Pharmacol* 217:114–124
360. Laier P, Metzдорff SB, Borch J, Hagen ML, Hass U, Christiansen S, Axelstad M, Kledal T, Dalgaard M, McKinnell C, Brokken LJ, Vinggaard AM 2006 Mechanisms of action underlying the antiandrogenic effects of the fungicide prochloraz. *Toxicol Appl Pharmacol* 213: 160–171
  361. Vinggaard AM, Christiansen S, Laier P, Poulsen ME, Breinholt V, Jarfelt K, Jacobsen H, Dalgaard M, Nellemann C, Hass U 2005 Perinatal exposure to the fungicide prochloraz feminizes the male rat offspring. *Toxicol Sci* 85:886–897
  362. Blystone CR, Lambright CS, Howdeshell KL, Furr J, Sternberg RM, Butterworth BC, Durhan EJ, Makynen EA, Ankley GT, Wilson VS, Leblanc GA, Gray Jr LE 2007 Sensitivity of fetal rat testicular steroidogenesis to maternal prochloraz exposure and the underlying mechanism of inhibition. *Toxicol Sci* 97:512–519
  363. Noriega NC, Ostby J, Lambright C, Wilson VS, Gray Jr LE 2005 Late gestational exposure to the fungicide prochloraz delays the onset of parturition and causes reproductive malformations in male but not female rat offspring. *Biol Reprod* 72:1324–1335
  364. Wilson VS, Lambright C, Furr J, Ostby J, Wood C, Held G, Gray Jr LE 2004 Phthalate ester-induced gubernacular lesions are associated with reduced *insl3* gene expression in the fetal rat testis. *Toxicol Lett* 146:207–215
  365. Lambright C, Ostby J, Bobseine K, Wilson V, Hotchkiss AK, Mann PC, Gray Jr LE 2000 Cellular and molecular mechanisms of action of linuron: an antiandrogenic herbicide that produces reproductive malformations in male rats. *Toxicol Sci* 56:389–399
  366. Blystone CR, Furr J, Lambright CS, Howdeshell KL, Ryan BC, Wilson VS, Leblanc GA, Gray Jr LE 2007 Prochloraz inhibits testosterone production at dosages below those that affect androgen-dependent organ weights or the onset of puberty in the male Sprague Dawley rat. *Toxicol Sci* 97:65–74
  367. Shepherd J 2006 Who should receive a statin these days? Lessons from recent clinical trials. *J Intern Med* 260:305–319
  368. Hennekens CH 2001 Current perspectives on lipid lowering with statins to decrease risk of cardiovascular disease. *Clin Cardiol* 24(7 Suppl):II-2–5
  369. Henck JW, Craft WR, Black A, Colgin J, Anderson JA 1998 Pre- and postnatal toxicity of the HMG-CoA reductase inhibitor atorvastatin in rats. *Toxicol Sci* 41:88–99
  370. Kazmin A, Garcia-Bournissen F, Koren G 2007 Risks of statin use during pregnancy: a systematic review. *J Obstet Gynaecol Can* 29:906–908
  371. Brown MS, Kovanen PT, Goldstein JL 1979 Receptor-mediated uptake of lipoprotein-cholesterol and its utilization for steroid synthesis in the adrenal cortex. *Recent Prog Horm Res* 35:215–257
  372. Gwynne JT, Strauss 3rd JF 1982 The role of lipoproteins in steroidogenesis and cholesterol metabolism in steroidogenic glands. *Endocr Rev* 3:299–329
  373. Hosokawa A, Bar-Oz B, Ito S 2003 Use of lipid-lowering agents (statins) during pregnancy. *Can Fam Physician* 49: 747–749
  374. Edison RJ, Muenke M 2004 Central nervous system and limb anomalies in case reports of first-trimester statin exposure. *N Engl J Med* 350:1579–1582
  375. Pollack PS, Shields KE, Burnett DM, Osborne MJ, Cunningham ML, Stepanavage ME 2005 Pregnancy outcomes after maternal exposure to simvastatin and lovastatin. *Birth Defects Res A Clin Mol Teratol* 73:888–896
  376. Dostal LA, Schardein JL, Anderson JA 1994 Developmental toxicity of the HMG-CoA reductase inhibitor, atorvastatin, in rats and rabbits. *Teratology* 50:387–394
  377. Azzarito C, Boiardi L, Vergoni W, Zini M, Portioli I 1996 Testicular function in hypercholesterolemic male patients during prolonged simvastatin treatment. *Horm Metab Res* 28:193–198
  378. Dobs AS, Schrott H, Davidson MH, Bays H, Stein EA, Kush D, Wu M, Mitchel Y, Illingworth RD 2000 Effects of high-dose simvastatin on adrenal and gonadal steroidogenesis in men with hypercholesterolemia. *Metabolism* 49: 1234–1238
  379. Bernini GP, Brogi G, Argenio GF, Moretti A, Salvetti A 1998 Effects of long-term pravastatin treatment on spermatogenesis and on adrenal and testicular steroidogenesis in male hypercholesterolemic patients. *J Endocrinol Invest* 21:310–317
  380. Dobs AS, Miller S, Neri G, Weiss S, Tate AC, Shapiro DR, Musliner TA 2000 Effects of simvastatin and pravastatin on gonadal function in male hypercholesterolemic patients. *Metabolism* 49:115–121
  381. Dobs AS, Sarma PS, Schteingart D 1993 Long-term endocrine function in hypercholesterolemic patients treated with pravastatin, a new 3-hydroxy-3-methylglutaryl coenzyme A reductase inhibitor. *Metabolism* 42:1146–1152
  382. Farnsworth WH, Hoeg JM, Maher M, Brittain EH, Sherins RJ, Brewer Jr HB 1987 Testicular function in type II hyperlipoproteinemic patients treated with lovastatin (mevinolin) or neomycin. *J Clin Endocrinol Metab* 65: 546–550
  383. Kjaer K, Hangaard J, Petersen NE, Hagen C 1992 Effect of simvastatin in patients with type I (insulin-dependent) diabetes mellitus and hypercholesterolemia. *Acta Endocrinol (Copenh)* 126:229–232
  384. Purvis K, Tollefsrud A, Rui H, Haug E, Norseth J, Viksmoen L, Ose L, Lund H 1992 Short-term effects of treatment with simvastatin on testicular function in patients with heterozygous familial hypercholesterolaemia. *Eur J Clin Pharmacol* 42:61–64
  385. Santini SA, Carrozza C, Lulli P, Zuppi C, CarloTonolo G, Musumeci S 2003 Atorvastatin treatment does not affect gonadal and adrenal hormones in type 2 diabetes patients with mild to moderate hypercholesterolemia. *J Atheroscler Thromb* 10:160–164
  386. Travia D, Tosi F, Negri C, Faccini G, Moghetti P, Muggeo M 1995 Sustained therapy with 3-hydroxy-3-methylglutaryl-coenzyme-A reductase inhibitors does not impair steroidogenesis by adrenals and gonads. *J Clin Endocrinol Metab* 80:836–840
  387. Adah F, Benghuzzi H, Tucci M, Russell G, Tsao A, Olivier J, England B 2005 Evaluation of the male reproductive organs after treatment with continuous sustained delivery of statin for fracture healing. *Biomed Sci Instrum* 41:54–61
  388. Hou JW, Collins DC, Schleicher RL 1990 Sources of cho-

- lesterol for testosterone biosynthesis in murine Leydig cells. *Endocrinology* 127:2047–2055
389. Heudorf U, Mersch-Sundermann V, Angerer J 2007 Phthalates: toxicology and exposure. *Int J Hyg Environ Health* 210:623–634
390. Swan SH, Main KM, Liu F, Stewart SL, Kruse RL, Calafat AM, Mao CS, Redmon JB, Ternand CL, Sullivan S, Teague JL 2005 Decrease in anogenital distance among male infants with prenatal phthalate exposure. *Environ Health Perspect* 113:1056–1061
391. Swan SH 2008 Environmental phthalate exposure in relation to reproductive outcomes and other health endpoints in humans. *Environ Res* 108:177–184
392. Bustamante-Montes LP, Hernández-Valero MA, Garcia-Fabila M, Halley-Castillo E, Karam-Calderon MA, Borja-Aburto VH 2008 Prenatal phthalate exposure and decrease in anogenital distance in Mexican male newborns. *Epidemiology* 19:S270
393. Gray Jr LE, Ostby J, Furr J, Price M, Veeramachaneni DN, Parks L 2000 Perinatal exposure to the phthalates DEHP, BBP, and DINP, but not DEP, DMP, or DOTP, alters sexual differentiation of the male rat. *Toxicol Sci* 58:350–365
394. Howdeshell KL, Wilson VS, Furr J, Lambright CR, Rider CV, Blystone CR, Hotchkiss AK, Gray Jr LE 2008 A mixture of five phthalate esters inhibits fetal testicular testosterone production in the Sprague-Dawley rat in a cumulative, dose-additive manner. *Toxicol Sci* 105:153–165
395. Huang PC, Kuo PL, Chou YY, Lin SJ, Lee CC 2009 Association between prenatal exposure to phthalates and the health of newborns. *Environ Int* 35:14–20
396. McKinnell C, Mitchell RT, Walker M, Morris K, Kelnar CJ, Wallace WH, Sharpe RM 2009 Effect of fetal or neonatal exposure to monobutyl phthalate (MBP) on testicular development and function in the marmoset. *Hum Reprod* 24:2244–2254
397. Forest MG, Sizonenko PC, Cathiard AM, Bertrand J 1974 Hypophyso-gonadal function in humans during the first year of life. 1. Evidence for testicular activity in early infancy. *J Clin Invest* 53:819–828
398. Main KM, Mortensen GK, Kaleva MM, Boisen KA, Damgaard IN, Chellakooty M, Schmidt IM, Suomi AM, Virtanen HE, Petersen DV, Andersson AM, Toppari J, Skakkebaek NE 2006 Human breast milk contamination with phthalates and alterations of endogenous reproductive hormones in infants three months of age. *Environ Health Perspect* 114:270–276
399. Duty SM, Calafat AM, Silva MJ, Ryan L, Hauser R 2005 Phthalate exposure and reproductive hormones in adult men. *Hum Reprod* 20:604–610
400. Hodges JK, Eastman SA, Jenkins N 1983 Sex steroids and their relationship to binding proteins in the serum of the marmoset monkey (*Callithrix jacchus*). *J Endocrinol* 96:443–450
401. Pan G, Hanaoka T, Yoshimura M, Zhang S, Wang P, Tsukino H, Inoue K, Nakazawa H, Tsugane S, Takahashi K 2006 Decreased serum free testosterone in workers exposed to high levels of di-n-butyl phthalate (DBP) and di-2-ethylhexyl phthalate (DEHP): a cross-sectional study in China. *Environ Health Perspect* 114:1643–1648
402. Akingbemi BT, Youker RT, Sottas CM, Ge R, Katz E, Klinefelter GR, Zirkin BR, Hardy MP 2001 Modulation of rat Leydig cell steroidogenic function by di(2-ethylhexyl)phthalate. *Biol Reprod* 65:1252–1259
403. Agarwal DK, Eustis S, Lamb 4th JC, Reel JR, Kluwe WM 1986 Effects of di(2-ethylhexyl) phthalate on the gonadal pathophysiology, sperm morphology, and reproductive performance of male rats. *Environ Health Perspect* 65:343–350
404. Jones HB, Garside DA, Liu R, Roberts JC 1993 The influence of phthalate esters on Leydig cell structure and function in vitro and in vivo. *Exp Mol Pathol* 58:179–193
405. Carruthers CM, Foster PM 2005 Critical window of male reproductive tract development in rats following gestational exposure to di-n-butyl phthalate. *Birth Defects Res B Dev Reprod Toxicol* 74:277–285
406. Ema M, Miyawaki E, Kawashima K 1998 Further evaluation of developmental toxicity of di-n-butyl phthalate following administration during late pregnancy in rats. *Toxicol Lett* 98:87–93
407. Parks LG, Ostby JS, Lambright CR, Abbott BD, Klinefelter GR, Barlow NJ, Gray Jr LE 2000 The plasticizer diethylhexyl phthalate induces malformations by decreasing fetal testosterone synthesis during sexual differentiation in the male rat. *Toxicol Sci* 58:339–349
408. Fisher JS, Macpherson S, Marchetti N, Sharpe RM 2003 Human ‘testicular dysgenesis syndrome’: a possible model using in utero exposure of the rat to dibutyl phthalate. *Hum Reprod* 18:1383–1394
409. Mylchreest E, Sar M, Wallace DG, Foster PM 2002 Fetal testosterone insufficiency and abnormal proliferation of Leydig cells and gonocytes in rats exposed to di(n-butyl) phthalate. *Reprod Toxicol* 16:19–28
410. Shultz VD, Phillips S, Sar M, Foster PM, Gaido KW 2001 Altered gene profiles in fetal rat testes after in utero exposure to di(n-butyl) phthalate. *Toxicol Sci* 64:233–242
411. McKee RH, Pavkov KL, Trimmer GW, Keller LH, Stump DG 2006 An assessment of the potential developmental and reproductive toxicity of di-isoheptyl phthalate in rodents. *Reprod Toxicol* 21:241–252
412. Lahousse SA, Wallace DG, Liu D, Gaido KW, Johnson KJ 2006 Testicular gene expression profiling following prepubertal rat mono-(2-ethylhexyl) phthalate exposure suggests a common initial genetic response at fetal and prepubertal ages. *Toxicol Sci* 93:369–381
413. Lehmann KP, Phillips S, Sar M, Foster PM, Gaido KW 2004 Dose-dependent alterations in gene expression and testosterone synthesis in the fetal testes of male rats exposed to di (n-butyl) phthalate. *Toxicol Sci* 81:60–68
414. Plummer S, Sharpe RM, Hallmark N, Mahood IK, Elcombe C 2007 Time-dependent and compartment-specific effects of in utero exposure to di(n-butyl) phthalate on gene/protein expression in the fetal rat testis as revealed by transcription profiling and laser capture microdissection. *Toxicol Sci* 97:520–532
415. Gaido KW, Hensley JB, Liu D, Wallace DG, Borghoff S, Johnson KJ, Hall SJ, Boekelheide K 2007 Fetal mouse phthalate exposure shows that gonocyte multinucleation is not associated with decreased testicular testosterone. *Toxicol Sci* 97:491–503
416. Liu X, He DW, Zhang DY, Lin T, Wei GH 2008 Di(2-ethylhexyl) phthalate (DEHP) increases transforming growth factor- $\beta$ 1 expression in fetal mouse genital tubercles. *J Toxicol Environ Health A* 71:1289–1294

417. Mylchreest E, Wallace DG, Cattley RC, Foster PM 2000 Dose-dependent alterations in androgen-regulated male reproductive development in rats exposed to di(n-butyl) phthalate during late gestation. *Toxicol Sci* 55:143–151
418. Heindel JJ, Gulati DK, Mounce RC, Russell SR, Lamb 4th JC 1989 Reproductive toxicity of three phthalic acid esters in a continuous breeding protocol. *Fundam Appl Toxicol* 12:508–518
419. Shiota K, Nishimura H 1982 Teratogenicity of di(2-ethylhexyl) phthalate (DEHP) and di-n-butyl phthalate (DBP) in mice. *Environ Health Perspect* 45:65–70
420. Song XF, Wei GH, Liu X, Zhang DY, Chen X, Deng YJ 2008 Effects of diethylhexyl phthalate (DEHP) on INSL3 mRNA expression by Leydig cells derived from mouse embryos and in newborn mice. *J Int Med Res* 36:512–521
421. Gunnarsson D, Leffler P, Ekwurtzel E, Martinsson G, Liu K, Selstam G 2008 Mono-(2-ethylhexyl) phthalate stimulates basal steroidogenesis by a cAMP-independent mechanism in mouse gonadal cells of both sexes. *Reproduction* 135:693–703
422. Dees JH, Gazouli M, Papadopoulos V 2001 Effect of mono-ethylhexyl phthalate on MA-10 Leydig tumor cells. *Reprod Toxicol* 15:171–187
423. Lehraiki A, Racine C, Krust A, Habert R, Levacher C 2009 Phthalates impair germ cell number in the mouse fetal testis by an androgen- and estrogen-independent mechanism. *Toxicol Sci* 111:372–382
424. Cook JC, Mullin LS, Frame SR, Biegel LB 1993 Investigation of a mechanism for Leydig cell tumorigenesis by linuron in rats. *Toxicol Appl Pharmacol* 119:195–204
425. McIntyre BS, Barlow NJ, Wallace DG, Maness SC, Gaido KW, Foster PM 2000 Effects of in utero exposure to linuron on androgen-dependent reproductive development in the male Crl:CD(SD)BR rat. *Toxicol Appl Pharmacol* 167:87–99
426. Hotchkiss AK, Parks-Saldutti LG, Ostby JS, Lambright C, Furr J, Vandenberg JG, Gray Jr LE 2004 A mixture of the “antiandrogens” linuron and butyl benzyl phthalate alters sexual differentiation of the male rat in a cumulative fashion. *Biol Reprod* 71:1852–1861
427. Wilson VS, Lambright CR, Furr JR, Howdeshell KL, Earl Gray Jr L 2009 The herbicide linuron reduces testosterone production from the fetal rat testis during both in utero and in vitro exposures. *Toxicol Lett* 186:73–77
428. O'Connor JC, Frame SR, Ladics GS 2002 Evaluation of a 15-day screening assay using intact male rats for identifying antiandrogens. *Toxicol Sci* 69:92–108
429. Guo YL, Hsu PC, Hsu CC, Lambert GH 2000 Semen quality after prenatal exposure to polychlorinated biphenyls and dibenzofurans. *Lancet* 356:1240–1241
430. Mocarelli P, Gerthoux PM, Patterson Jr DG, Milani S, Limonta G, Bertona M, Signorini S, Tramacere P, Colombo L, Crespi C, Brambilla P, Sarto C, Carreri V, Sampson EJ, Turner WE, Needham LL 2008 Dioxin exposure, from infancy through puberty, produces endocrine disruption and affects human semen quality. *Environ Health Perspect* 116:70–77
431. Faqi AS, Dalsenter PR, Merker HJ, Chahoud I 1998 Reproductive toxicity and tissue concentrations of low doses of 2,3,7,8-tetrachlorodibenzo-p-dioxin in male offspring rats exposed throughout pregnancy and lactation. *Toxicol Appl Pharmacol* 150:383–392
432. Gray Jr LE, Kelce WR, Monosson E, Ostby JS, Birnbaum LS 1995 Exposure to TCDD during development permanently alters reproductive function in male Long Evans rats and hamsters: reduced ejaculated and epididymal sperm numbers and sex accessory gland weights in offspring with normal androgenic status. *Toxicol Appl Pharmacol* 131:108–118
433. Mably TA, Moore RW, Peterson RE 1992 In utero and lactational exposure of male rats to 2,3,7,8-tetrachlorodibenzo-p-dioxin. 1. Effects on androgenic status. *Toxicol Appl Pharmacol* 114:97–107
434. Ohsako S, Miyabara Y, Sakaue M, Ishimura R, Kakeyama M, Izumi H, Yonemoto J, Tohyama C 2002 Developmental stage-specific effects of perinatal 2,3,7,8-tetrachlorodibenzo-p-dioxin exposure on reproductive organs of male rat offspring. *Toxicol Sci* 66:283–292
435. Takeda T, Matsumoto Y, Koga T, Mutoh J, Nishimura Y, Shimazoe T, Ishii Y, Ishida T, Yamada H 2009 Maternal exposure to dioxin disrupts gonadotropin production in fetal rats and imprints defects in sexual behavior. *J Pharmacol Exp Ther* 329:1091–1099
436. Taketoh J, Mutoh J, Takeda T, Ogishima T, Takeda S, Ishii Y, Ishida T, Yamada H 2007 Suppression of fetal testicular cytochrome P450 17 by maternal exposure to 2,3,7,8-tetrachlorodibenzo-p-dioxin: a mechanism involving an initial effect on gonadotropin synthesis in the pituitary. *Life Sci* 80:1259–1267
437. Mutoh J, Taketoh J, Okamura K, Kagawa T, Ishida T, Ishii Y, Yamada H 2006 Fetal pituitary gonadotropin as an initial target of dioxin in its impairment of cholesterol transportation and steroidogenesis in rats. *Endocrinology* 147:927–936
438. Theobald HM, Peterson RE 1997 In utero and lactational exposure to 2,3,7,8-tetrachlorodibenzo-p-dioxin: effects on development of the male and female reproductive system of the mouse. *Toxicol Appl Pharmacol* 145:124–135
439. Rouiller-Fabre V, Lecref L, Gautier C, Saez JM, Habert R 1998 Expression and effect of insulin-like growth factor I on rat fetal Leydig cell function and differentiation. *Endocrinology* 139:2926–2934
440. El-Gehani F, Tena-Sempere M, Huhtaniemi I 2000 Evidence that pituitary adenylate cyclase-activating polypeptide is a potent regulator of fetal rat testicular steroidogenesis. *Biol Reprod* 63:1482–1489
441. El-Gehani F, Zhang FP, Pakarinen P, Rannikko A, Huhtaniemi I 1998 Gonadotropin-independent regulation of steroidogenesis in the fetal rat testis. *Biol Reprod* 58:116–123
442. El-Gehani F, Tena-Sempere M, Huhtaniemi I 1998 Vasoactive intestinal peptide is an important endocrine regulatory factor of fetal rat testicular steroidogenesis. *Endocrinology* 139:1474–1480
443. El-Gehani F, Tena-Sempere M, Ruskoaho H, Huhtaniemi I 2001 Natriuretic peptides stimulate steroidogenesis in the fetal rat testis. *Biol Reprod* 65:595–600
